# Supplementary material for: Catalyst-free three-component reaction to synthesize chiral α-amino phosphine oxides
Source: Royal Society of Chemistry journal article supplement (doi:10.1039/c4ra05645k), 2014-01-01

## Supporting Information

### Catalyst-Free Three-Component Reaction to Synthesize Chiral $\alpha$ -Amino Phosphine Oxides

Xi-An Li,<sup>a</sup> Jia-Yuan Li,<sup>a</sup> Bin Yang,<sup>a</sup> and Shang-Dong Yang<sup>a,b\*</sup>

<sup>a</sup> State Key Laboratory of Applied Organic Chemistry, Lanzhou University, Lanzhou  
730000, P. R. China.

<sup>b</sup> State Key Laboratory for Oxo Synthesis and Selective Oxidation, Lanzhou Institute  
of Chemical Physics, Lanzhou, 730000, P. R. China

E-mail: yangshd@lzu.edu.cn

#### Contents:

|                                                                                                                               |    |
|-------------------------------------------------------------------------------------------------------------------------------|----|
| 1. General Information .....                                                                                                  | 1  |
| 2. General Synthesis of Substrates .....                                                                                      | 2  |
| 2.1. Preparation of (S)-ethyl pyrrolidine-2-carboxylate .....                                                                 | 2  |
| 2.2. Preparation of (S)-ethyl 2-amino-3-phenylpropanoate .....                                                                | 2  |
| 3. General procedures for Three-Component System of Chiral Amino Acid Ester to<br>Construct Chiral Phosphorus Compounds. .... | 2  |
| 4. Characterization of products (2a-v and 3) .....                                                                            | 3  |
| 5. NMR Spectra .....                                                                                                          | 13 |

#### 1. General Information

All reactions involving air- and moisture-sensitive reagent were carried out under argon atmosphere. All chemicals were purchased from Aldrich and used without further purification. Thin-layer chromatography (TLC) was performed using 60 mesh silica gel plates visualized with short-wavelength UV light (254 nm). Silica gel 60 (230~400 mesh) was used for column chromatography. IR spectra were recorded with an FT-IR spectrometer as KBr plates or as thin films and peaks are reported in  $\text{cm}^{-1}$ .  $^1\text{H}$  NMR,  $^{13}\text{C}$  NMR and  $^{31}\text{P}$  NMR spectra were recorded on a Bruker INOVA-400 and a Bruker AC-250. NMR spectra were

on a Bruker INOVA-400 and a Bruker AC-250. NMR spectras were recorded on a 400 instrument (400 MHz for  $^1\text{H}$ , 100 MHz for  $^{13}\text{C}$  and 162 MHz for  $^{31}\text{P}$ ). Chemical shifts ( $\delta$ ) were measured in ppm relative to TMS  $\delta = 0$  for  $^1\text{H}$  or to chloroform  $\delta = 77.0$  for  $^{13}\text{C}$  as internal standard. Data are reported as follows: Chemical shift, multiplicity (s = singlet, d = doublet, t = triplet, q = quartet, m = multiplet), Coupling constants,  $J$ , are reported in hertz. Mass spectrometry were measured with MICRO-TOF Q II (ESI).

## 2. General Synthesis of Substrstes

### 2.1. Preparation of (*S*)-ethyl pyrrolidine-2-carboxylate<sup>1</sup>

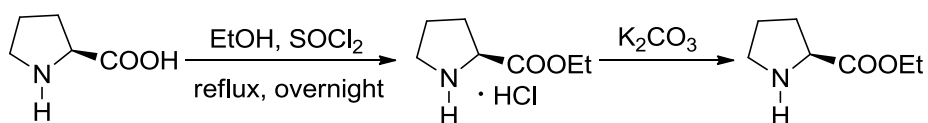

To dissolve L-proline (10 g, 86.9 mmol) in 100 mL ethanol, cooled to 0 °C, (12.9 mL, 173.9 mmol) SOCl<sub>2</sub> was added dropwise and stirred at 0 °C for 1 h. Then, further stirred for 12 h at reflux. After cooling to room temperature and neutralizing the ester hydrochloride with saturated K<sub>2</sub>CO<sub>3</sub> solution, extracted with ethyl acetate, and concentrated under reduced pressure. The residue was purified by column chromatography, affording a yellow liquid 10 g, yield 80.6%.

### 2.2. Preparation of (*S*)-ethyl 2-amino-3-phenylpropanoate<sup>2</sup>

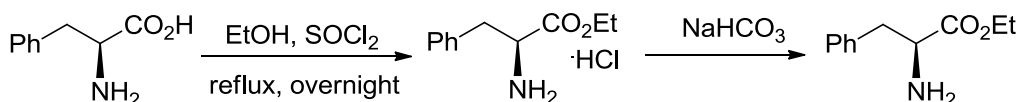

To dissolve (*S*)-2-amino-3-phenylpropanoic acid (10 g, 60.0 mmol) in 100 mL ethanol, cooled to 0 °C, thionyl chloride (6.5 mL, 90.0 mmol) was added dropwise and stirred at 0 °C for 1 h. Then, further stirred for 12 h at reflux. After cooling to room temperature and neutralizing the ester hydrochloride with saturated NaHCO<sub>3</sub> to pH = 8, extracted with ethyl acetate, and concentrated under reduced pressure. The residue was purified by column chromatography, affording a yellow liquid 11.6 g, yield 90.0%.

## 3. General procedures for Three-Component System of Chiral Amino Acid Ester to Construct Chiral Phosphorus Compounds.

(*L*)-ethyl pyrrolidine-2-carboxylate (0.45 mmol, 64 mg), diphenylphosphine oxide (0.3 mmol, 60.6 mg) were added to Schlenk tube, then, the tube was charged with

argon. Benzaldehyde (0.45 mmol, 46  $\mu$ L) and toluene (2 mL) was added using a syringe respectively. The reaction mixture was stirred at 110°C until substrate disappeared as determined by TLC. After cooling to room temperature, the reaction system was purified by silica gel flash chromatography to afford pure **2a** as a yellow oil (101.0 mg, 78%).

#### 4. Characterization of products (2a-v and 3):

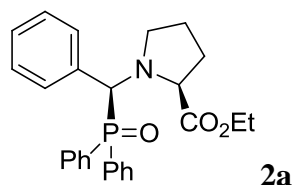

#### (S)-ethyl 1-((S)-(diphenylphosphoryl)(phenyl) methyl) pyrrolidine-2-carboxylate

**(2a)** : Light yellow liquid,  $^1\text{H NMR}$  (400 MHz,  $\text{CDCl}_3$ ):  $\delta$  8.13-8.08 (m, 2H), 7.53-7.41 (m, 7H), 7.28-7.26 (m, 1H), 7.22-7.17 (m, 5H), 4.98 (d,  $J = 9.6$  Hz, 1H), 4.10-4.02 (m, 2H), 3.51-3.47 (m, 1H), 3.23-3.19 (m, 1H), 3.05-2.98 (m, 1H), 1.82-1.76 (m, 2H), 1.70-1.62 (m, 2H), 1.20 (t,  $J = 8.0$  Hz, 3H).  $^{13}\text{C NMR}$  (100 MHz,  $\text{CDCl}_3$ ):  $\delta$  173.6, 132.5 (dd,  $J_{\text{C-P}} = 4.0$  Hz,  $J_{\text{C-P}} = 97.5$  Hz), 131.83, 131.5 (dd,  $J_{\text{C-P}} = 8.0$  Hz,  $J_{\text{C-P}} = 47.0$  Hz), 131.4 (d,  $J_{\text{C-P}} = 3.0$  Hz), 131.1, 131.0, 128.0 (dd,  $J_{\text{C-P}} = 11.0$  Hz,  $J_{\text{C-P}} = 25.0$  Hz), 128.0, 63.0 (d,  $J_{\text{C-P}} = 82.0$  Hz), 61.8 (d,  $J_{\text{C-P}} = 11.0$  Hz), 60.3, 49.6, 27.9, 23.7, 14.2.  $^{31}\text{P NMR}$  (162 MHz,  $\text{CDCl}_3$ ):  $\delta$  30.80. **IR** (neat): 3373, 2976, 1738, 1438, 1216, 1183, 1119, 755, 697, 549  $\text{cm}^{-1}$ . **MS (ESI)**: (M+H) $^+$  434.1736.

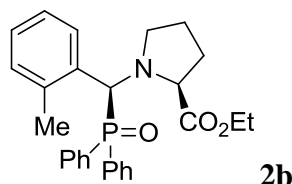

#### (S)-ethyl 1-((S)-(diphenylphosphoryl)(o-tolyl) methyl) pyrrolidine-2-carboxylate

**(2b)**: Light yellow solid,  $^1\text{H NMR}$  (400 MHz,  $\text{CDCl}_3$ ):  $\delta$  8.27-8.15 (m, 2H), 8.07 (d,  $J = 8.0$  Hz, 1H), 7.59-7.51 (m, 3H), 7.35-7.27 (m, 3H), 7.24-7.10 (m, 4H), 6.91 (d,  $J = 8.0$  Hz, 1H), 5.29 (d,  $J = 8.0$  Hz, 1H), 4.10-4.04 (m, 2H), 3.40 (s, 1H), 3.29-3.22 (m, 2H), 1.89-1.76 (m, 2H), 1.85 (s, 3H), 1.71-1.66 (m, 2H), 1.20 (t,  $J = 8.0$  Hz, 3H).  $^{13}\text{C NMR}$  (100 MHz,  $\text{CDCl}_3$ ):  $\delta$  174.2, 137.6, 133.3, 132.6, 132.3, 132.1 (d,  $J_{\text{C-P}} = 9.0$  Hz), 131.8 (d,  $J_{\text{C-P}} = 3.0$  Hz), 131.68, 131.6 (d,  $J_{\text{C-P}} = 3.0$  Hz), 131.3, 131.1 (d,  $J_{\text{C-P}} = 9.0$  Hz), 131.0, 130.0, 128.2 (d,  $J_{\text{C-P}} = 11.0$  Hz), 127.7, 127.6 (d,  $J_{\text{C-P}} = 11.0$  Hz), 125.8, 63.4 (d,  $J_{\text{C-P}} = 11.0$  Hz), 60.22, 57.7 (d,  $J_{\text{C-P}} = 81.0$  Hz), 50.4, 28.6, 23.9, 19.3, 14.2.  $^{31}\text{P NMR}$  (162 MHz,  $\text{CDCl}_3$ ):  $\delta$  30.77. **IR** (neat): 3395, 2975, 1735, 1438, 1186,

1118, 1027, 753, 696, 555  $\text{cm}^{-1}$ . **MS (ESI):** (M+H)<sup>+</sup> 448.2234.

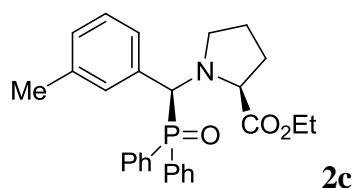

**(S)-ethyl 1-((S)-(diphenylphosphoryl)(m-tolyl) methyl) pyrrolidine-2-carboxylate (2c):** Light yellow liquid, <sup>1</sup>H NMR (400 MHz, CDCl<sub>3</sub>): δ 8.13-8.08 (m, 2H), 7.54-7.44 (m, 5H), 7.29-7.27 (m, 1H), 7.24-7.19 (m, 4H), 7.11 (t, *J* = 8.0 Hz, 1H), 7.02 (d, *J* = 8.0 Hz, 1H), 4.96 (d, *J* = 8.0 Hz, 1H), 4.12-4.02 (m, 2H), 3.50-3.46 (m, 1H), 3.25 (t, *J* = 8.0 Hz, 1H), 3.03 (d, *J* = 8.0 Hz, 1H), 2.26 (s, 3H), 1.83-1.78 (m, 2H), 1.71-1.63 (m, 2H), 1.22 (t, *J* = 8.0 Hz, 3H). <sup>13</sup>C NMR (100 MHz, CDCl<sub>3</sub>): δ 173.6, 137.5, 132.4 (dd, *J*<sub>C-P</sub> = 32.0 Hz, *J*<sub>C-P</sub> = 67.5 Hz), 131.8, 131.7, 131.4 (d, *J*<sub>C-P</sub> = 9.0 Hz, *J*<sub>C-P</sub> = 66.5 Hz), 131.1 (dd, *J*<sub>C-P</sub> = 3 Hz, *J*<sub>C-P</sub> = 42 Hz), 128.6, 128.3 (d, *J*<sub>C-P</sub> = 6.0 Hz), 128.1 (d, *J*<sub>C-P</sub> = 12.0 Hz), 127.8 (t, *J*<sub>C-P</sub> = 5.5 Hz), 63.1 (d, *J*<sub>C-P</sub> = 83 Hz), 61.8 (d, *J*<sub>C-P</sub> = 12 Hz), 60.3, 49.6, 27.9, 23.9, 14.2. <sup>31</sup>P NMR (162 MHz, CDCl<sub>3</sub>): δ 30.69. **IR** (neat): 3397, 2974, 1737, 1438, 1185, 1118, 1031, 701, 560, 518  $\text{cm}^{-1}$ . **MS (ESI):** (M+H)<sup>+</sup> 448.1971.

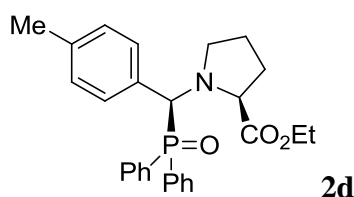

**(S)-ethyl 1-((S)-(diphenylphosphoryl)(p-tolyl) methyl) pyrrolidine-2-carboxylate (2d):** Light yellow liquid, <sup>1</sup>H NMR (400 MHz, CDCl<sub>3</sub>): δ 8.12-8.08 (m, 2H), 7.52-7.46 (m, 5H), 7.34-7.27 (m, 3H), 7.23-7.19 (m, 2H), 7.04-7.02 (m, 2H), 4.97 (d, *J* = 8.0 Hz, 1H), 4.12-4.02 (m, 2H), 3.53-3.48 (m, 1H), 3.23-3.19 (m, 1H), 3.02-2.96 (m, 1H), 2.27 (s, 3H), 1.82-1.74 (m, 2H), 1.72-1.59 (m, 2H), 1.22 (t, *J* = 8.0 Hz, 3H). <sup>13</sup>C NMR (100 MHz, CDCl<sub>3</sub>): δ 173.5, 137.5, 132.8 (dd, *J*<sub>C-P</sub> = 5.0 Hz, *J*<sub>C-P</sub> = 97.0 Hz), 131.7 (d, *J*<sub>C-P</sub> = 9.0 Hz), 131.6 (dd, *J*<sub>C-P</sub> = 3 Hz, *J*<sub>C-P</sub> = 40 Hz), 131.1 (dd, *J*<sub>C-P</sub> = 7.0 Hz, *J*<sub>C-P</sub> = 17.0 Hz), 128.7, 128.5, 128.0 (d, *J*<sub>C-P</sub> = 12.0 Hz), 127.9 (d, *J*<sub>C-P</sub> = 11.0 Hz), 62.6 (d, *J*<sub>C-P</sub> = 84.0 Hz), 61.8 (d, *J*<sub>C-P</sub> = 12.0 Hz), 60.3, 49.4, 27.9, 23.6, 14.2. <sup>31</sup>P NMR (162 MHz, CDCl<sub>3</sub>): δ 30.87. **IR** (neat): 3404, 2975, 1736, 1438, 1186, 1118, 1030, 752, 698, 562, 542  $\text{cm}^{-1}$ . **MS (ESI):** (M+H)<sup>+</sup> 448.2336.

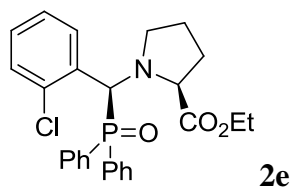

**(S)-ethyl 1-((S)-(2-chlorophenyl)(diphenylphosphoryl) methyl)pyrrolidine-2-carboxylate (2e):** Light yellow solid,  $^1\text{H NMR}$  (400 MHz,  $\text{CDCl}_3$ ):  $\delta$  8.23-8.18 (m, 3H), 7.53-7.48 (m, 5H), 7.28-7.11 (m, 6H), 5.73 (d,  $J = 10.8$  Hz, 1H), 4.09-4.04 (m, 2H), 3.60-3.57 (m, 1H), 3.24-3.20 (m, 1H), 2.99-2.97 (m, 1H), 1.88-1.62 (m, 4H), 1.20 (t,  $J = 8.0$  Hz, 3H).  $^{13}\text{C NMR}$  (100 MHz,  $\text{CDCl}_3$ ):  $\delta$  173.6, 135.4 (d,  $J_{\text{C-P}} = 9.0$  Hz), 133.2 (d,  $J_{\text{C-P}} = 4.0$  Hz), 131.5, 131.4 (dd,  $J_{\text{C-P}} = 9$  Hz,  $J_{\text{C-P}} = 99.0$  Hz), 131.4 (dd,  $J_{\text{C-P}} = 3.0$  Hz,  $J_{\text{C-P}} = 39.0$  Hz), 130.2 (d,  $J_{\text{C-P}} = 2.0$  Hz), 129.1, 128.0 (dd,  $J_{\text{C-P}} = 12.0$  Hz,  $J_{\text{C-P}} = 29.0$  Hz), 61.6 (d,  $J_{\text{C-P}} = 12.0$  Hz), 60.24, 57.4 (d,  $J_{\text{C-P}} = 83.0$  Hz), 49.5, 28.4, 23.4, 14.2.  $^{31}\text{P NMR}$  (162 MHz,  $\text{CDCl}_3$ ):  $\delta$  31.52. **IR** (neat): 3411, 2977, 1740, 1438, 1191, 1118, 1032, 755, 694, 552, 521  $\text{cm}^{-1}$ . **MS (ESI):** (M+H) $^+$  468.1679.

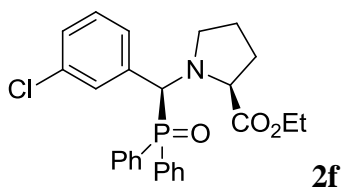

**(S)-ethyl 1-((S)-(3-chlorophenyl)(diphenylphosphoryl) methyl)pyrrolidine-2-carboxylate (2f):** Light yellow liquid,  $^1\text{H NMR}$  (400 MHz,  $\text{CDCl}_3$ ):  $\delta$  8.11-8.05 (m, 2H), 7.53-7.44 (m, 5H), 7.38-7.28 (m, 3H), 7.25-7.15 (m, 4H), 4.98 (d,  $J = 10.4$  Hz, 1H), 4.13-4.02 (m, 2H), 3.47-3.42 (m, 1H), 3.20 (t,  $J = 8.0$  Hz, 1H), 2.99-2.95 (m, 1H), 1.84-1.78 (m, 2H), 1.76-1.58 (m, 2H), 1.21 (t,  $J = 8.0$  Hz, 3H).  $^{13}\text{C NMR}$  (100 MHz,  $\text{CDCl}_3$ ):  $\delta$  173.3, 134.0 (d,  $J_{\text{C-P}} = 28.0$  Hz), 133.7 (d,  $J_{\text{C-P}} = 6.0$  Hz), 131.7, 131.3 (dd,  $J_{\text{C-P}} = 9.0$  Hz,  $J_{\text{C-P}} = 68.5$  Hz), 131.6, 131.2 (d,  $J_{\text{C-P}} = 2.0$  Hz), 130.9 (d,  $J_{\text{C-P}} = 7.0$  Hz), 129.3, 129.2, 128.1 (dd,  $J_{\text{C-P}} = 11$  Hz,  $J_{\text{C-P}} = 17.5$  Hz), 62.6 (d,  $J_{\text{C-P}} = 81.0$  Hz), 61.7 (d,  $J_{\text{C-P}} = 11.0$  Hz), 60.4, 49.6, 27.9, 23.6, 14.2.  $^{31}\text{P NMR}$  (162 MHz,  $\text{CDCl}_3$ ):  $\delta$  30.27. **IR** (neat): 3399, 2977, 1735, 1438, 1188, 1118, 1026, 752, 724, 700, 564, 516  $\text{cm}^{-1}$ . **MS (ESI):** (M+H) $^+$  468.1139.

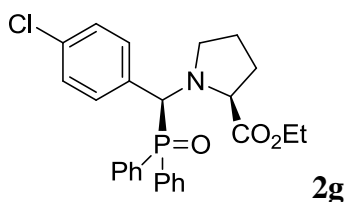

**(S)-ethyl 1-((S)-(4-chlorophenyl)(diphenylphosphoryl) methyl)pyrrolidine-2-carboxylate (2g):** Light yellow liquid,  $^1\text{H NMR}$  (400 MHz,  $\text{CDCl}_3$ ):  $\delta$  8.10-8.07 (m, 2H),

7.52-7.45 (m, 5H), 7.44-7.43 (m, 2H), 7.38-7.36 (m, 1H), 7.30-7.18 (m, 4H), 4.99 (d,  $J = 9.6$  Hz, 1H), 4.10-4.03 (m, 2H), 3.49-3.43 (m, 1H), 3.18-3.14 (m, 1H), 2.98-2.92 (m, 1H), 1.82-1.76 (m, 2H), 1.68-1.61 (m, 2H), 1.20 (t,  $J = 8.0$  Hz, 3H).  $^{13}\text{C}$  NMR (100 MHz,  $\text{CDCl}_3$ ):  $\delta$  173.3, 133.9 (d,  $J_{\text{C-P}} = 1.0$  Hz), 132.3 (dd,  $J_{\text{C-P}} = 11.0$  Hz,  $J_{\text{C-P}} = 140.0$  Hz), 131.7 (dd,  $J_{\text{C-P}} = 6.0$  Hz,  $J_{\text{C-P}} = 150.0$  Hz), 131.6 (d,  $J_{\text{C-P}} = 8.0$  Hz), 131.4 (dd,  $J_{\text{C-P}} = 3.0$  Hz,  $J_{\text{C-P}} = 30.0$  Hz), 130.4, 128.2, 128.1 (d,  $J_{\text{C-P}} = 2.0$  Hz), 128.0, 62.2 (d,  $J_{\text{C-P}} = 82.0$  Hz), 61.7 (d,  $J_{\text{C-P}} = 11.0$  Hz), 60.4, 49.4, 27.8, 23.6, 14.2.  $^{31}\text{P}$  NMR (162 MHz,  $\text{CDCl}_3$ ):  $\delta$  30.42. **IR** (neat): 3412, 2978, 1735, 1488, 1438, 1187, 1118, 1092, 1017, 754, 723, 695, 553, 526  $\text{cm}^{-1}$ . **MS (ESI)**:  $(\text{M}+\text{H})^+ 468.1794$ .

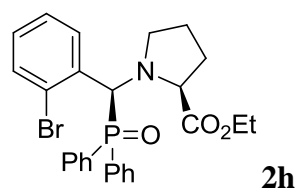

**(S)-ethyl 1-((S)-(2-bromophenyl)(diphenylphosphoryl)methyl)pyrrolidine-2-carboxylate (2h)**: White solid,  $^1\text{H}$  NMR (400 MHz,  $\text{CDCl}_3$ ):  $\delta$  8.25-8.20 (m, 3H), 7.54-7.46 (m, 5H), 7.34-7.27 (m, 3H), 7.22-7.17 (m, 2H), 7.04 (t,  $J = 8.0$  Hz, 1H), 5.68 (d,  $J = 12.0$  Hz, 1H), 4.10-4.04 (m, 2H), 3.58-3.55 (m, 1H), 3.29-3.25 (m, 1H), 3.06-3.00 (m, 1H), 1.85-1.62 (m, 4H), 1.21 (t,  $J = 8.0$  Hz, 3H).  $^{13}\text{C}$  NMR (100 MHz,  $\text{CDCl}_3$ ):  $\delta$  173.8, 133.2 (d,  $J_{\text{C-P}} = 16.0$  Hz), 132.5, 132.0 (d,  $J_{\text{C-P}} = 130.0$  Hz), 132.2 (d,  $J_{\text{C-P}} = 3.0$  Hz), 132.0 (d,  $J_{\text{C-P}} = 66.0$  Hz), 131.4 (dd,  $J_{\text{C-P}} = 9.0$  Hz,  $J_{\text{C-P}} = 88.5$  Hz), 131.4 (dd,  $J_{\text{C-P}} = 3.0$  Hz,  $J_{\text{C-P}} = 41.5$  Hz), 128.2 (d,  $J_{\text{C-P}} = 224.0$  Hz), 127.9 (dd,  $J_{\text{C-P}} = 11.0$  Hz,  $J_{\text{C-P}} = 37.5$  Hz), 126.7 (d,  $J_{\text{C-P}} = 9.0$  Hz), 61.4 (d,  $J_{\text{C-P}} = 12.0$  Hz), 61.7 (d,  $J_{\text{C-P}} = 82.0$  Hz), 60.3, 49.7, 28.6, 23.5, 14.2.  $^{31}\text{P}$  NMR (162 MHz,  $\text{CDCl}_3$ ):  $\delta$  30.25. **IR** (neat): 3415, 2977, 1739, 1464, 1437, 1189, 1118, 1022, 754, 695, 551, 520  $\text{cm}^{-1}$ . **MS (ESI)**:  $(\text{M}+\text{H})^+ 512.1246$ .

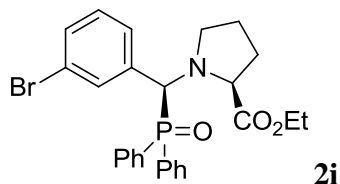

**(S)-ethyl 1-((S)-(3-bromophenyl)(diphenylphosphoryl)methyl)pyrrolidine-2-carboxylate (2i)**: Light yellow liquid,  $^1\text{H}$  NMR (400 MHz,  $\text{CDCl}_3$ ):  $\delta$  8.09-8.07 (m, 2H), 7.54-7.43 (m, 7H), 7.34-7.29 (m, 2H), 7.25-7.21 (m, 2H), 7.09 (t,  $J = 7.6$  Hz, 1H), 4.96 (d,  $J = 9.2$  Hz, 1H), 4.13-4.02 (m, 2H), 3.45-3.41 (m, 1H), 3.22-3.18 (m, 1H), 3.01-2.95 (m, 1H), 1.84-1.76 (m, 2H), 1.69-1.63 (m, 2H), 1.22 (t,  $J = 8.0$  Hz, 3H).  $^{13}\text{C}$  NMR (100 MHz,  $\text{CDCl}_3$ ):  $\delta$  173.3, 134.5, 133.8 (d,  $J_{\text{C-P}} = 7.0$  Hz), 132.6 (d,  $J_{\text{C-P}} = 6.0$

Hz), 131.6, 131.3 (dd,  $J_{C-P} = 9.0$  Hz,  $J_{C-P} = 68.5$  Hz), 131.2 (d,  $J_{C-P} = 3.0$  Hz), 129.7 (d,  $J_{C-P} = 3.0$  Hz), 129.5, 128.1 (dd,  $J_{C-P} = 12.0$  Hz,  $J_{C-P} = 17.0$  Hz), 122.1, 62.6 (d,  $J_{C-P} = 81.0$  Hz), 61.7 (d,  $J_{C-P} = 11.0$  Hz), 60.4, 49.6, 27.9, 23.6, 14.2.  $^{31}\text{P}$  NMR (162 MHz,  $\text{CDCl}_3$ ):  $\delta$  30.25. IR (neat): 3391, 3058, 2372, 1735, 1438, 1187, 1118, 751, 700, 560, 516  $\text{cm}^{-1}$ . MS (ESI):  $(\text{M}+\text{H})^+ 514.0572$ .

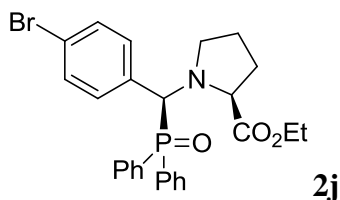

**(S)-ethyl 1-((S)-(4-bromophenyl)(diphenylphosphoryl)methyl)pyrrolidine-2-carboxylate (2j):** Yellow liquid,  $^1\text{H}$  NMR (400 MHz,  $\text{CDCl}_3$ ):  $\delta$  8.16-8.04 (m, 2H), 7.53-7.48 (m, 5H), 7.46-7.28 (m, 6H), 7.24-7.22 (m, 2H), 4.98 (d,  $J = 9.6$  Hz, 1H), 4.10-4.03 (m, 2H), 3.45-3.42 (m, 1H), 3.16 (t,  $J = 8.0$  Hz, 1H), 2.88-2.98 (m, 1H), 1.82-1.76 (m, 2H), 1.68-1.61 (m, 2H), 1.20 (t,  $J = 8.0$  Hz, 3H).  $^{13}\text{C}$  NMR (100 MHz,  $\text{CDCl}_3$ ):  $\delta$  173.2, 132.7 (d,  $J_{C-P} = 6.0$  Hz), 132.6 (d,  $J_{C-P} = 11.0$  Hz), 131.2 (dd,  $J_{C-P} = 9.0$  Hz,  $J_{C-P} = 71.0$  Hz), 131.3, 131.2 (d,  $J_{C-P} = 3.0$  Hz), 131.1, 128.1 (d,  $J_{C-P} = 24.0$  Hz), 128.1, 122.2 (d,  $J_{C-P} = 2.0$  Hz), 62.1 (d,  $J_{C-P} = 94.0$  Hz), 61.7 (d,  $J_{C-P} = 23.0$  Hz), 60.3, 49.4, 27.8, 23.5, 14.1.  $^{31}\text{P}$  NMR (162 MHz,  $\text{CDCl}_3$ ):  $\delta$  30.59, 29.26. IR (neat): 3396, 2970, 2374, 1731, 1438, 1187, 1118, 699, 550, 521  $\text{cm}^{-1}$ . MS (ESI):  $(\text{M}+\text{H})^+ 512.0805$ .

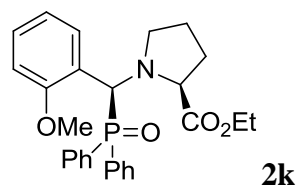

**(S)-ethyl 1-((S)-(diphenylphosphoryl)(2-methoxyphenyl)methyl)pyrrolidine-2-carboxylate (2k):** Light yellow solid,  $^1\text{H}$  NMR (400 MHz,  $\text{CDCl}_3$ ):  $\delta$  8.19-8.14 (m, 2H), 8.09 (d,  $J = 7.6$  Hz, 1H), 7.54-7.45 (m, 5H), 7.28-7.13 (m, 4H), 6.90 (t,  $J = 7.2$  Hz, 1H), 6.67 (d,  $J = 8.4$  Hz, 1H), 5.71 (d,  $J = 10.2$  Hz, 1H), 4.14-4.01 (m, 2H), 3.60 (s, 3H), 3.10-3.06 (m, 1H), 2.90-2.83 (m, 1H), 1.81-1.56 (m, 4H), 1.21 (t,  $J = 8.0$  Hz, 3H).  $^{13}\text{C}$  NMR (100 MHz,  $\text{CDCl}_3$ ):  $\delta$  173.7, 157.5 (d,  $J_{C-P} = 8.0$  Hz), 133.0 (dd,  $J_{C-P} = 26.0$  Hz,  $J_{C-P} = 97.5$  Hz), 132.0 (dd,  $J_{C-P} = 4.0$  Hz,  $J_{C-P} = 155.5$  Hz), 131.3 (dd,  $J_{C-P} = 9.0$  Hz,  $J_{C-P} = 107.5$  Hz), 130.8, 129.0, 127.8 (dd,  $J_{C-P} = 12.0$  Hz,  $J_{C-P} = 28.0$  Hz), 120.1, 119.9 (d,  $J_{C-P} = 2.0$  Hz), 109.8, 62.1 (d,  $J_{C-P} = 12.0$  Hz), 59.9, 55.0, 52.8 (d,  $J_{C-P} = 86.0$  Hz), 49.1, 28.2, 23.1, 14.2.  $^{31}\text{P}$  NMR (162 MHz,  $\text{CDCl}_3$ ):  $\delta$  32.23. IR (neat): 3418, 2973, 1741, 1487, 1438, 1243, 1179, 1118, 1027, 755, 696, 555, 515

cm<sup>-1</sup>. **MS (ESI):** (M+H)<sup>+</sup> 464.1631.

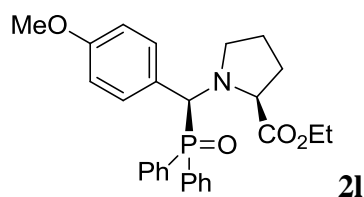

**(S)-ethyl 1-((S)-(diphenylphosphoryl)(2-methoxyphenyl) methyl) pyrrolidine-2-carboxylate (2l):** Light yellow liquid, <sup>1</sup>H NMR (400 MHz, CDCl<sub>3</sub>): δ 8.07-8.06 (m, 2H), 7.52-7.46 (m, 5H), 7.44-7.35 (m, 2H), 7.28-7.26 (m, 1H), 7.22-7.20 (m, 2H), 6.75 (d, *J* = 8.8 Hz, 2H), 4.94 (d, *J* = 10.4 Hz, 1H), 4.08-4.05 (m, 2H), 3.74 (s, 3H), 3.49-3.44 (m, 1H), 3.22-3.19 (m, 1H), 2.99-2.93 (m, 1H), 1.82-1.75 (m, 2H), 1.69-1.58 (m, 2H), 1.21 (t, *J* = 8.0 Hz, 3H). <sup>13</sup>C NMR (100 MHz, CDCl<sub>3</sub>): δ 173.5, 159.1, 132.8 (dd, *J*<sub>C-P</sub> = 16.0 Hz, *J*<sub>C-P</sub> = 97.0 Hz), 132.1 (dd, *J*<sub>C-P</sub> = 7.0 Hz, *J*<sub>C-P</sub> = 77.5 Hz), 131.32, 131.6 (d, *J*<sub>C-P</sub> = 9.0 Hz), 128.0 (dd, *J*<sub>C-P</sub> = 11.0 Hz, *J*<sub>C-P</sub> = 16.5 Hz), 123.7, 113.4, 62.2 (d, *J*<sub>C-P</sub> = 95.0 Hz), 61.8, 60.3, 55.0, 49.4, 27.9, 23.6, 14.2. <sup>31</sup>P NMR (162 MHz, CDCl<sub>3</sub>): δ 31.00. **IR** (neat): 3400, 2971, 1736, 1606, 1510, 1438, 1254, 1182, 1117, 1031, 751, 698, 550, 519 cm<sup>-1</sup>. **MS (ESI):** (M+H)<sup>+</sup> 464.2101.

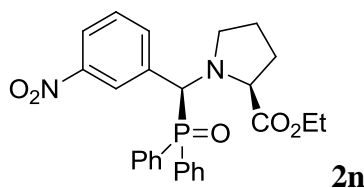

**(S)-ethyl 1-((S)-(diphenylphosphoryl)(3-nitrophenyl) methyl) pyrrolidine-2-carboxylate (2n):** Yellow liquid, <sup>1</sup>H NMR (400 MHz, CDCl<sub>3</sub>): δ 8.16-8.11 (m, 2H), 8.07-8.03 (m, 2H), 7.98-7.96 (m, 1H), 7.57-7.51 (m, 3H), 7.48-7.42 (m, 3H), 7.32-7.28 (m, 1H), 7.24-7.20 (m, 1H), 5.17 (d, *J* = 8.0 Hz, 1H), 4.16-4.06 (m, 2H), 3.45-3.40 (m, 1H), 3.17 (t, *J* = 8.0, 1H), 3.01 (q, *J* = 8.0, 1H), 1.85-1.81 (m, 2H), 1.71-1.67 (m, 2H), 1.22 (t, *J* = 8.0 Hz, 3H). <sup>13</sup>C NMR (100 MHz, CDCl<sub>3</sub>): δ 173.1, 147.7, 136.8 (d, *J*<sub>C-P</sub> = 5.0 Hz), 134.7, 132.3, 131.8 (d, *J*<sub>C-P</sub> = 2.0 Hz), 131.6, 131.2, 131.1 (d, *J*<sub>C-P</sub> = 24.0 Hz), 130.8 (d, *J*<sub>C-P</sub> = 9.0 Hz), 129.0, 128.3 (dd, *J*<sub>C-P</sub> = 12.0 Hz, *J*<sub>C-P</sub> = 15.5 Hz), 125.4 (d, *J*<sub>C-P</sub> = 8.0 Hz), 122.8, 62.5 (d, *J*<sub>C-P</sub> = 80.0 Hz), 61.8 (d, *J*<sub>C-P</sub> = 10.0 Hz), 60.5, 49.6, 27.9, 23.5, 14.1. <sup>31</sup>P NMR (162 MHz, CDCl<sub>3</sub>): δ 30.07. **IR** (neat): 3240, 2927, 1740, 1705, 1531, 1439, 1351, 1196, 1130, 753, 727, 697, 551 cm<sup>-1</sup>. **MS (ESI):** (M+H)<sup>+</sup> 479.1876.



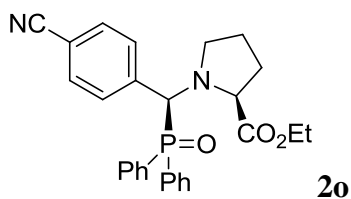

**(S)-ethyl 1-((S)-(4-cyanophenyl)(diphenylphosphoryl) methyl) pyrrolidine-2-carboxylate (2o):** Light yellow liquid,  $^1\text{H NMR}$  (400 MHz,  $\text{CDCl}_3$ ):  $\delta$  8.18-8.04 (m, 2H), 7.55-7.53 (m, 7H), 7.52-7.48 (m, 2H), 7.48-7.30 (m, 1H), 7.28-7.21 (m, 2H), 5.08 (s, 1H), 4.11-4.05 (m, 2H), 3.45-3.41 (m, 1H), 3.16-3.12 (m, 1H), 3.04-2.94 (m, 1H), 1.84-1.80 (m, 2H), 1.72-1.64 (m, 2H), 1.21 (t,  $J = 8.0$  Hz, 3H).  $^{13}\text{C NMR}$  (100 MHz,  $\text{CDCl}_3$ ):  $\delta$  173.2, 138.0, 132.3 (d,  $J_{\text{C-P}} = 14.0$  Hz), 131.6 (dd,  $J_{\text{C-P}} = 3.0$  Hz,  $J_{\text{C-P}} = 39.5$  Hz), 131.7 (d,  $J_{\text{C-P}} = 4.0$  Hz), 131.4 (d,  $J_{\text{C-P}} = 1.0$  Hz), 131.3 (d,  $J_{\text{C-P}} = 15.0$  Hz), 130.9 (d,  $J_{\text{C-P}} = 9.0$  Hz), 128.3 (dd,  $J_{\text{C-P}} = 12.0$  Hz,  $J_{\text{C-P}} = 17.5$  Hz), 118.5, 111.7, 62.8 (d,  $J_{\text{C-P}} = 80.0$  Hz), 61.7 (d,  $J_{\text{C-P}} = 11.0$  Hz), 60.5, 49.7, 28.0, 23.6, 14.2.  $^{31}\text{P NMR}$  (162 MHz,  $\text{CDCl}_3$ ):  $\delta$  29.93. **IR** (neat): 3402, 2978, 2229, 1732, 1438, 1189, 1117, 1023, 754, 730, 697, 566, 529  $\text{cm}^{-1}$ . **MS (ESI):** ( $\text{M}+\text{H}$ ) $^+$  495.1957.

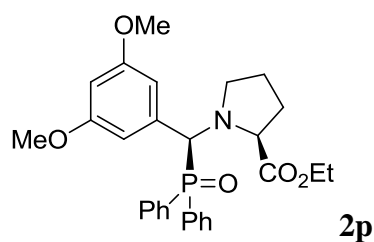

**(S)-ethyl 1-((S)-(3,5-dimethoxyphenyl)(diphenylphosphoryl) methyl) pyrrolidine-2-carboxylate (2p):** Yellow liquid,  $^1\text{H NMR}$  (400 MHz,  $\text{CDCl}_3$ ):  $\delta$  8.14-8.04 (m, 2H), 7.52-7.47 (m, 5H), 7.31-7.21 (m, 3H), 6.59 (s, 2H), 6.31 (s, 1H), 4.92 (d,  $J = 9.2$  Hz, 2H), 4.04-4.08 (m, 2H), 3.70 (s, 6H), 3.46-3.41 (m, 1H), 3.32 (t,  $J = 7.2$  Hz, 1H), 3.08-3.02 (m, 1H), 1.83-1.79 (m, 2H), 1.68-1.65 (m, 2H), 1.20 (t,  $J = 8.0$  Hz, 3H).  $^{13}\text{C NMR}$  (100 MHz,  $\text{CDCl}_3$ ):  $\delta$  173.6, 160.2, 134.2, 132.7 (d,  $J_{\text{C-P}} = 97.0$  Hz), 132.5 (d,  $J_{\text{C-P}} = 97.0$  Hz), 131.4 (dd,  $J_{\text{C-P}} = 9.0$  Hz,  $J_{\text{C-P}} = 63.0$  Hz), 131.4 (d,  $J_{\text{C-P}} = 2.0$  Hz), 131.0, 128.0 (dd,  $J_{\text{C-P}} = 11.0$  Hz,  $J_{\text{C-P}} = 21.0$  Hz), 109.1 (d,  $J_{\text{C-P}} = 7.0$  Hz), 100.4, 63.1 (d,  $J_{\text{C-P}} = 82.0$  Hz), 61.8 (d,  $J_{\text{C-P}} = 11.0$  Hz), 60.3, 55.3, 49.8, 28.0, 23.7, 14.2.  $^{31}\text{P NMR}$  (162 MHz,  $\text{CDCl}_3$ ):  $\delta$  30.41. **IR** (neat): 3298, 2935, 1736, 1594, 1461, 1436, 1202, 1157, 1117, 1064, 723, 700, 530, 516  $\text{cm}^{-1}$ . **MS (ESI):** ( $\text{M}+\text{H}$ ) $^+$  494.2084.

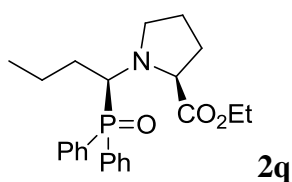

**(S)-ethyl 1-((S)-1-(diphenylphosphoryl) butyl) pyrrolidine-2-carboxylate (2q):**

Light yellow liquid,  $^1\text{H NMR}$  (400 MHz,  $\text{CDCl}_3$ ):  $\delta$  7.94-7.82 (m, 4H), 7.49-7.29 (m, 6H), 4.12-4.07 (m, 1H), 4.01-3.96 (m, 1H), 3.93-3.87 (m, 1 H), 3.67 (t,  $J = 6.4$  Hz, 0.5H), 3.38-3.35 (m, 1H), 3.12-3.11 (m, 1H), 2.84-2.82 (m, 0.5H), 1.93-1.80 (m, 2H), 1.78-1.57 (m, 2H), 1.54-1.51 (m, 2H), 1.29-1.22 (m, 3H), 1.18-1.14 (m, 2H), 0.89-0.78 (m, 3H),  $^{13}\text{C NMR}$  (100 MHz,  $\text{CDCl}_3$ ):  $\delta$  174.5 (d,  $J_{\text{C-P}} = 3.0$  Hz), 173.6, 134.1 (d,  $J_{\text{C-P}} = 128.0$  Hz), 133.8, 133.7, 132.9 (d,  $J_{\text{C-P}} = 6.0$  Hz), 132.4, 131.6, 131.5, 131.4 (d,  $J_{\text{C-P}} = 3.0$  Hz), 131.3 (d,  $J_{\text{C-P}} = 3.0$  Hz), 131.1, 131.0 (d,  $J_{\text{C-P}} = 3.0$  Hz), 131.0 (d,  $J_{\text{C-P}} = 2.0$  Hz), 130.9, 130.8, 130.6 (d,  $J_{\text{C-P}} = 11.0$  Hz), 128.8 (d,  $J_{\text{C-P}} = 13.0$  Hz), 128.5 (d,  $J_{\text{C-P}} = 14.0$  Hz), 128.4, 128.3 (d,  $J_{\text{C-P}} = 4.0$  Hz), 127.8 (d,  $J_{\text{C-P}} = 12.0$  Hz), 63.6 (d,  $J_{\text{C-P}} = 12.0$  Hz), 63.2, 60.2 (d,  $J_{\text{C-P}} = 7.0$  Hz), 59.0 (d,  $J_{\text{C-P}} = 36.0$  Hz), 58.2 (d,  $J_{\text{C-P}} = 21.0$  Hz), 48.4, 47.3, 30.0 (d,  $J_{\text{C-P}} = 7.0$  Hz), 29.2 (d,  $J_{\text{C-P}} = 68.0$  Hz), 26.5 (d,  $J_{\text{C-P}} = 4.0$  Hz), 24.4 (d,  $J_{\text{C-P}} = 32.0$  Hz), 21.6 (d,  $J_{\text{C-P}} = 9.0$  Hz), 20.0 (d,  $J_{\text{C-P}} = 12.0$  Hz), 14.1 (d,  $J_{\text{C-P}} = 11.0$  Hz), 14.0 (d,  $J_{\text{C-P}} = 26.0$  Hz).  $^{31}\text{P NMR}$  (162 MHz,  $\text{CDCl}_3$ ):  $\delta$  32.20, 31.25. **IR** (neat): 3395, 2962, 1739, 1655, 1438, 1184, 1117, 1097, 1028, 750, 722, 698, 545  $\text{cm}^{-1}$ . **MS (ESI):** ( $\text{M}+\text{H}$ ) $^+$  400.1971.

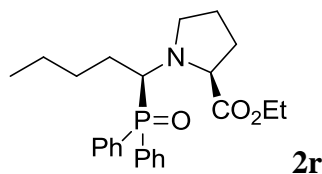

**(S)-ethyl 1-((S)-1-(diphenylphosphoryl) pentyl) pyrrolidine-2-carboxylate (2r):**

Light yellow liquid,  $^1\text{H NMR}$  (400 MHz,  $\text{CDCl}_3$ ):  $\delta$  7.94-7.81 (m, 4H), 7.49-7.39 (m, 6H), 4.11-4.07 (m, 1H), 3.96-3.86 (m, 2H), 3.69-3.65 (m, 0.5 H), 3.36-3.34 (m, 1H), 3.15-3.12 (m, 1H), 2.85-2.83 (m, 0.5H), 1.92-1.87 (m, 2H), 1.81-1.52 (m, 4H), 1.27-1.13 (m, 7H), 0.83-0.74 (m, 3H),  $^{13}\text{C NMR}$  (100 MHz,  $\text{CDCl}_3$ ):  $\delta$  174.4 (d,  $J_{\text{C-P}} = 3.0$  Hz), 173.6, 134.3 (d,  $J_{\text{C-P}} = 87.0$  Hz), 133.8 (d,  $J_{\text{C-P}} = 4.0$  Hz), 133.2 (d,  $J_{\text{C-P}} = 48.0$  Hz), 132.7 (d,  $J_{\text{C-P}} = 39.0$  Hz), 131.6, 131.51, 131.48, 131.4 (d,  $J_{\text{C-P}} = 3.0$  Hz), 131.3 (d,  $J_{\text{C-P}} = 2.0$  Hz), 131.14, 131.10, 131.0, 130.9 (d,  $J_{\text{C-P}} = 5.0$  Hz), 130.8, 130.7 (d,  $J_{\text{C-P}} = 8.0$  Hz), 128.9 (d,  $J_{\text{C-P}} = 13.0$  Hz), 128.6, 128.5 (d,  $J_{\text{C-P}} = 4.0$  Hz), 128.3 (d,  $J_{\text{C-P}} = 3.0$  Hz), 127.9 (d,  $J_{\text{C-P}} = 11.0$  Hz), 63.7 (d,  $J_{\text{C-P}} = 11.0$  Hz), 63.2, 60.3 (d,  $J_{\text{C-P}} = 7.0$  Hz), 59.2 (d,  $J_{\text{C-P}} = 33.0$  Hz), 58.5 (d,  $J_{\text{C-P}} = 18.0$  Hz), 48.4, 47.4, 30.7 (d,  $J_{\text{C-P}} = 10.0$  Hz), 29.6, 29.1, 29.0 (d,  $J_{\text{C-P}} = 2.0$  Hz), 27.5 (d,  $J_{\text{C-P}} = 6.0$  Hz), 24.4 (d,  $J_{\text{C-P}} = 32.0$  Hz), 24.1 (d,  $J_{\text{C-P}} = 5.0$  Hz), 22.4 (d,  $J_{\text{C-P}} = 28.0$  Hz), 14.1 (d,  $J_{\text{C-P}} = 12.0$  Hz), 13.8 (d,  $J_{\text{C-P}} = 14.0$  Hz).  $^{31}\text{P NMR}$  (162 MHz,  $\text{CDCl}_3$ ):  $\delta$  32.24, 31.25. **IR** (neat):

3399, 2956, 2931, 2866, 1738, 1438, 1271, 1186, 1115, 1028, 720, 699, 552, 531  $\text{cm}^{-1}$ . **MS (ESI):** (M+H)<sup>+</sup> 414.2137.

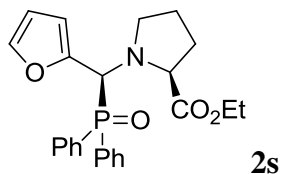

**(S)-ethyl 1-((S)-(diphenylphosphoryl)(furan-2-yl) methyl) pyrrolidine-2-carboxylate (2s):** Yellow liquid, <sup>1</sup>H NMR (400 MHz, CDCl<sub>3</sub>):  $\delta$  8.10-8.05 (m, 2H), 7.59-7.45 (m, 5H), 7.37-7.27 (m, 4H), 6.68 (d,  $J = 3.0$  Hz, 1H), 6.27-6.26 (m, 1H), 5.21 (d,  $J = 32.0$  Hz, 1H), 4.11-4.06 (m, 2H), 3.43-3.39 (m, 1H), 3.28 (t,  $J = 8.0$  Hz, 1H), 2.96-2.88 (m, 1H), 1.84-1.80 (m, 2H), 1.74-1.53 (m, 4H), 1.22 (t,  $J = 8.0$  Hz, 3H). <sup>13</sup>C NMR (100 MHz, CDCl<sub>3</sub>):  $\delta$  173.3, 146.5 (d,  $J_{\text{C-P}} = 6.0$  Hz), 142.5 (d,  $J_{\text{C-P}} = 1.0$  Hz), 132.6 (d,  $J_{\text{C-P}} = 60.0$  Hz), 131.9, 131.84, 131.75, 131.5 (d,  $J_{\text{C-P}} = 3.0$  Hz), 131.3, 131.2, 130.9 (d,  $J_{\text{C-P}} = 9.0$  Hz), 128.1, 128.0, 63.2 (d,  $J_{\text{C-P}} = 12.0$  Hz), 60.4, 57.6 (d,  $J_{\text{C-P}} = 86.0$  Hz), 49.4, 28.0, 23.6, 14.1. <sup>31</sup>P NMR (162 MHz, CDCl<sub>3</sub>):  $\delta$  29.54. **IR** (neat): 3427, 2976, 2372, 1736, 1438, 1199, 1118, 1012, 749, 724, 698, 541, 522  $\text{cm}^{-1}$ . **MS (ESI):** (M+H)<sup>+</sup> 424.1829.

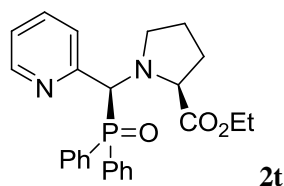

**(S)-ethyl 1-((S)-(diphenylphosphoryl)(pyridin-2-yl) methyl) pyrrolidine-2-carboxylate (2t):** Light yellow liquid, <sup>1</sup>H NMR (400 MHz, CDCl<sub>3</sub>):  $\delta$  8.40-8.39 (m, 1H), 8.11-8.09 (m, 2H), 8.07-8.06 (m, 1H), 7.85-7.82 (m, 0.25H), 7.71-7.63 (m, 0.5H), 7.59-7.45 (m, 7H), 7.31-7.21 (m, 4H), 7.09-7.06 (m, 1H), 5.31 (d,  $J = 9.6$  Hz, 1H), 5.21 (d,  $J = 7.6$  Hz, 0.25H), 4.06-3.96 (m, 2H), 3.89-3.86 (m, 0.5H), 3.52-3.42 (m, 2H), 3.22-3.18 (m, 0.5H), 3.13-3.07 (m, 1H), 1.82-1.60 (m, 5H), 1.19-1.15 (m, 3H), 1.07 (t,  $J = 7.2$  Hz, 1H). <sup>13</sup>C NMR (100 MHz, CDCl<sub>3</sub>):  $\delta$  174.4, 173.3, 155.2 (d,  $J_{\text{C-P}} = 3.0$  Hz), 153.4 (d,  $J_{\text{C-P}} = 4.0$  Hz), 149.0, 148.6, 135.9, 135.7, 133.6, 132.9, 132.6 (d,  $J_{\text{C-P}} = 14.0$  Hz), 131.9, 131.7, 131.6, 131.54, 131.48, 131.41, 131.38, 131.3 (d,  $J_{\text{C-P}} = 9.0$  Hz), 131.2, 131.1, 131.0, 130.9, 128.1 (d,  $J_{\text{C-P}} = 11.0$  Hz), 128.0 (d,  $J_{\text{C-P}} = 25.0$  Hz), 127.9, 127.8, 125.7 (d,  $J_{\text{C-P}} = 3.0$  Hz), 125.2 (d,  $J_{\text{C-P}} = 3.0$  Hz), 122.5, 122.3, 67.4 (d,  $J_{\text{C-P}} = 77.0$  Hz), 65.2 (d,  $J_{\text{C-P}} = 80.0$  Hz), 63.3 (d,  $J_{\text{C-P}} = 4.0$  Hz), 62.2 (d,  $J_{\text{C-P}} = 11.0$  Hz), 60.8, 60.2, 60.0, 58.4, 50.7 (d,  $J_{\text{C-P}} = 6.0$  Hz), 49.5, 47.6, 30.2, 29.5, 29.3, 28.3, 24.6, 23.9, 23.3, 22.1, 14.0, 13.8. <sup>31</sup>P NMR (162 MHz, CDCl<sub>3</sub>):  $\delta$  33.19, 29.56.

**IR** (neat): 3424, 3056, 2977, 2873, 1737, 1586, 1467, 1436, 1189, 1118, 1028, 752, 722, 696, 551, 521  $\text{cm}^{-1}$ . **MS (ESI)**:  $(\text{M}+\text{H})^+$  435.1947.

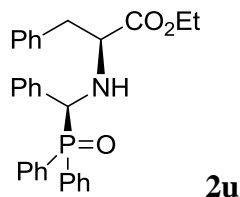

**(S)-ethyl 2-(((S)-(diphenylphosphoryl)(phenyl) methyl) amino)-3-phenylpropanoate (2u)**: Light yellow liquid,  $^1\text{H NMR}$  (400 MHz,  $\text{CDCl}_3$ ):  $\delta$  7.89-7.84 (m, 2H), 7.76-7.71 (m, 1H), 7.60-7.49 (m, 4H), 7.47-7.40 (m, 5H), 7.35-7.28 (m, 8H), 7.26-7.01 (m, 8H), 6.76 (d,  $J = 7.6$  Hz, 1H), 4.69 (d,  $J = 10.0$  Hz, 1H), 4.28-4.38 (d,  $J = 9.6$  Hz, 0.5H), 4.13-4.08 (m, 2H), 3.70-3.67 (m, 1H), 3.42-3.38 (m, 0.5H), 3.37-3.32 (m, 1H), 3.00-2.87 (m, 1H), 2.82-2.74 (m, 2H), 2.36 (s, 1H), 1.16 (t,  $J = 7.2$  Hz, 3H), 0.96 (t,  $J = 8.0$  Hz, 1.5H).  $^{13}\text{C NMR}$  (100 MHz,  $\text{CDCl}_3$ ):  $\delta$  173.6, 173.3, 137.5, 136.9, 135.1, 133.5 (d,  $J_{\text{C-P}} = 4.0$  Hz), 132.4 (d,  $J_{\text{C-P}} = 8.0$  Hz), 131.9 (d,  $J_{\text{C-P}} = 3.0$  Hz), 131.7, 131.6, 131.4 (d,  $J_{\text{C-P}} = 11.0$  Hz), 131.35 (d,  $J_{\text{C-P}} = 8.0$  Hz), 130.7, 130.6 (d,  $J_{\text{C-P}} = 95.0$  Hz), 130.2 (d,  $J_{\text{C-P}} = 50.0$  Hz), 129.3, 129.2, 129.1, 129.0, 128.9, 128.2 (d,  $J_{\text{C-P}} = 4.0$  Hz), 128.1, 127.83 (d,  $J_{\text{C-P}} = 11.0$  Hz), 127.82 (d,  $J_{\text{C-P}} = 1.0$  Hz), 127.8, 127.6 (d,  $J_{\text{C-P}} = 2.0$  Hz), 127.5 (d,  $J_{\text{C-P}} = 2.0$  Hz), 126.6, 126.4, 62.8 (d,  $J_{\text{C-P}} = 80.0$  Hz), 62.2 (d,  $J_{\text{C-P}} = 13.0$  Hz), 61.4 (d,  $J_{\text{C-P}} = 77.0$  Hz), 60.59, 60.55, 59.4 (d,  $J_{\text{C-P}} = 14.0$  Hz), 39.5, 39.3, 14.1, 13.7.  $^{31}\text{P NMR}$  (162 MHz,  $\text{CDCl}_3$ ):  $\delta$  31.35, 30.05. **IR** (neat): 3331, 1731, 1438, 1187, 1119, 1028, 752, 722, 699, 552, 501  $\text{cm}^{-1}$ . **MS (ESI)**:  $(\text{M}+\text{H})^+$  484.1971.

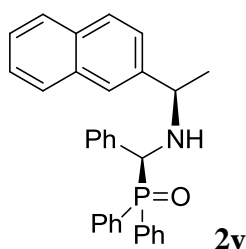

**((S)-(((R)-1-(naphthalen-2-yl) ethyl) amino)(phenyl) methyl) diphenylphosphine oxide (2v)**: Light yellow liquid,  $^1\text{H NMR}$  (400 MHz,  $\text{CDCl}_3$ ):  $\delta$  7.97-7.92 (m, 0.5H), 7.82-7.70 (m, 4H), 7.65 (d,  $J = 8.0$  Hz, 0.5H), 7.56-7.49 (m, 2H), 7.43-7.34 (m, 3H), 7.32-7.14 (m, 10H), 7.07-7.04 (m, 2H), 4.72 (d,  $J = 10.0$  Hz, 0.25H), 4.48-4.42 (m, 1H), 4.14-4.08 (m, 0.75H), 2.76 (s, 1H), 1.40-1.34 (m, 3H).  $^{13}\text{C NMR}$  (100 MHz,  $\text{CDCl}_3$ ):  $\delta$  140.6, 139.5, 135.9, 135.5, 133.7, 133.6, 132.0 (d,  $J_{\text{C-P}} = 10.0$  Hz), 131.8, 131.73, 131.69, 131.6, 131.51, 131.47, 131.30, 131.26, 131.2, 131.1, 131.0, 130.9, 130.8, 130.6 (d,  $J_{\text{C-P}} = 5.0$  Hz), 128.9 (d,  $J_{\text{C-P}} = 6.0$  Hz), 128.7 (d,  $J_{\text{C-P}} = 5.0$  Hz),

128.5, 128.1, 128.0, 128.0 (d,  $J_{C-P} = 40.0$  Hz), 127.74, 127.69, 127.6, 127.5, 127.3, 127.2, 125.4 (d,  $J_{C-P} = 4.0$  Hz), 125.1, 124.6, 123.2 (d,  $J_{C-P} = 42.0$  Hz), 60.4, 60.3, 59.6, 59.5, 24.2, 21.2.  $^{31}\text{P}$  NMR (162 MHz,  $\text{CDCl}_3$ ):  $\delta$  31.87, 31.13. IR (neat): 3328, 3058, 2969, 1595, 1438, 1187, 1120, 801, 780, 753, 722, 699, 551, 527, 502  $\text{cm}^{-1}$ . MS (ESI): (M+H)<sup>+</sup> 462.1884.

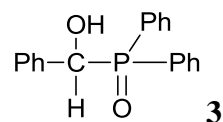

**(hydroxyl (phenyl) methyl) diphenylphosphine oxide (3):** Light yellow liquid,  $^1\text{H}$  NMR (400 MHz,  $\text{CD}_3\text{OD}$ ):  $\delta$  7.89-7.75 (m, 4H), 7.61-7.56 (m, 2H), 7.51-7.45 (m, 4H), 7.24-7.18 (m, 5H), 5.62 (d,  $J = 7.2$  Hz, 1H).  $^{13}\text{C}$  NMR (100 MHz,  $\text{CD}_3\text{OD}$ ):  $\delta$  138.4, 133.8 (d,  $J_{C-P} = 9.0$  Hz), 133.5 (d,  $J_{C-P} = 8.0$  Hz), 133.0 (d,  $J_{C-P} = 9.0$  Hz), 132.7 (d,  $J_{C-P} = 96.0$  Hz), 130.1 (d,  $J_{C-P} = 96.0$  Hz), 129.8 (d,  $J_{C-P} = 11.0$  Hz), 129.4 (d,  $J_{C-P} = 11.0$  Hz), 129.1, 129.0, 128.9, 74.6, 73.8.  $^{31}\text{P}$  NMR (162 MHz,  $\text{CD}_3\text{OD}$ ):  $\delta$  33.04. IR (neat): 3274, 2923, 1593, 1436, 1161, 1119, 1027, 722, 695, 546, 502  $\text{cm}^{-1}$ . MS (ESI): (M+H)<sup>+</sup> 309.0854.

#### References:

1. G. J. Wang, N. Goyal and B. Hopkinson, *Bioorg. Med. Chem. Lett.*, 2009, **19**, 3798.
2. S. Stella and A. Chadha, *Tetrahedron: Asymmetry*, 2010, **21**, 457.

#### 5. NMR Spectra

8.086  
8.082  
7.532  
7.518  
7.514  
7.509  
7.495  
7.489  
7.481  
7.469  
7.451  
7.448  
7.442  
7.424  
7.420  
7.406  
7.298  
7.295  
7.277  
7.270  
7.262  
7.258  
7.216  
7.207  
7.201  
7.191  
7.180  
7.177  
7.172  
4.996  
4.972  
4.105  
4.096  
4.087  
4.078  
4.070  
4.060  
4.051  
4.042  
4.033  
4.024  
4.015  
3.514  
3.505  
3.496  
3.491  
3.488  
3.482  
3.474  
3.465  
3.231  
3.213  
3.195  
3.042  
3.022  
3.001  
2.981  
1.824  
1.819  
1.809  
1.800  
1.800  
1.786  
1.781  
1.761  
1.750  
1.742  
1.725  
1.714  
1.705  
1.696  
1.675  
1.654  
1.645  
1.636  
1.626  
1.621  
1.603  
1.223  
1.206  
1.188

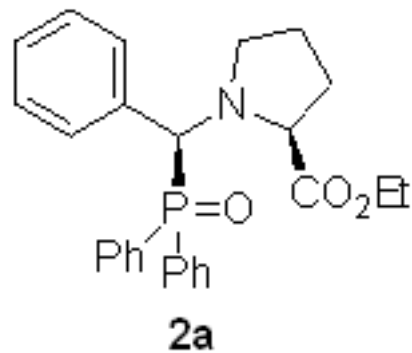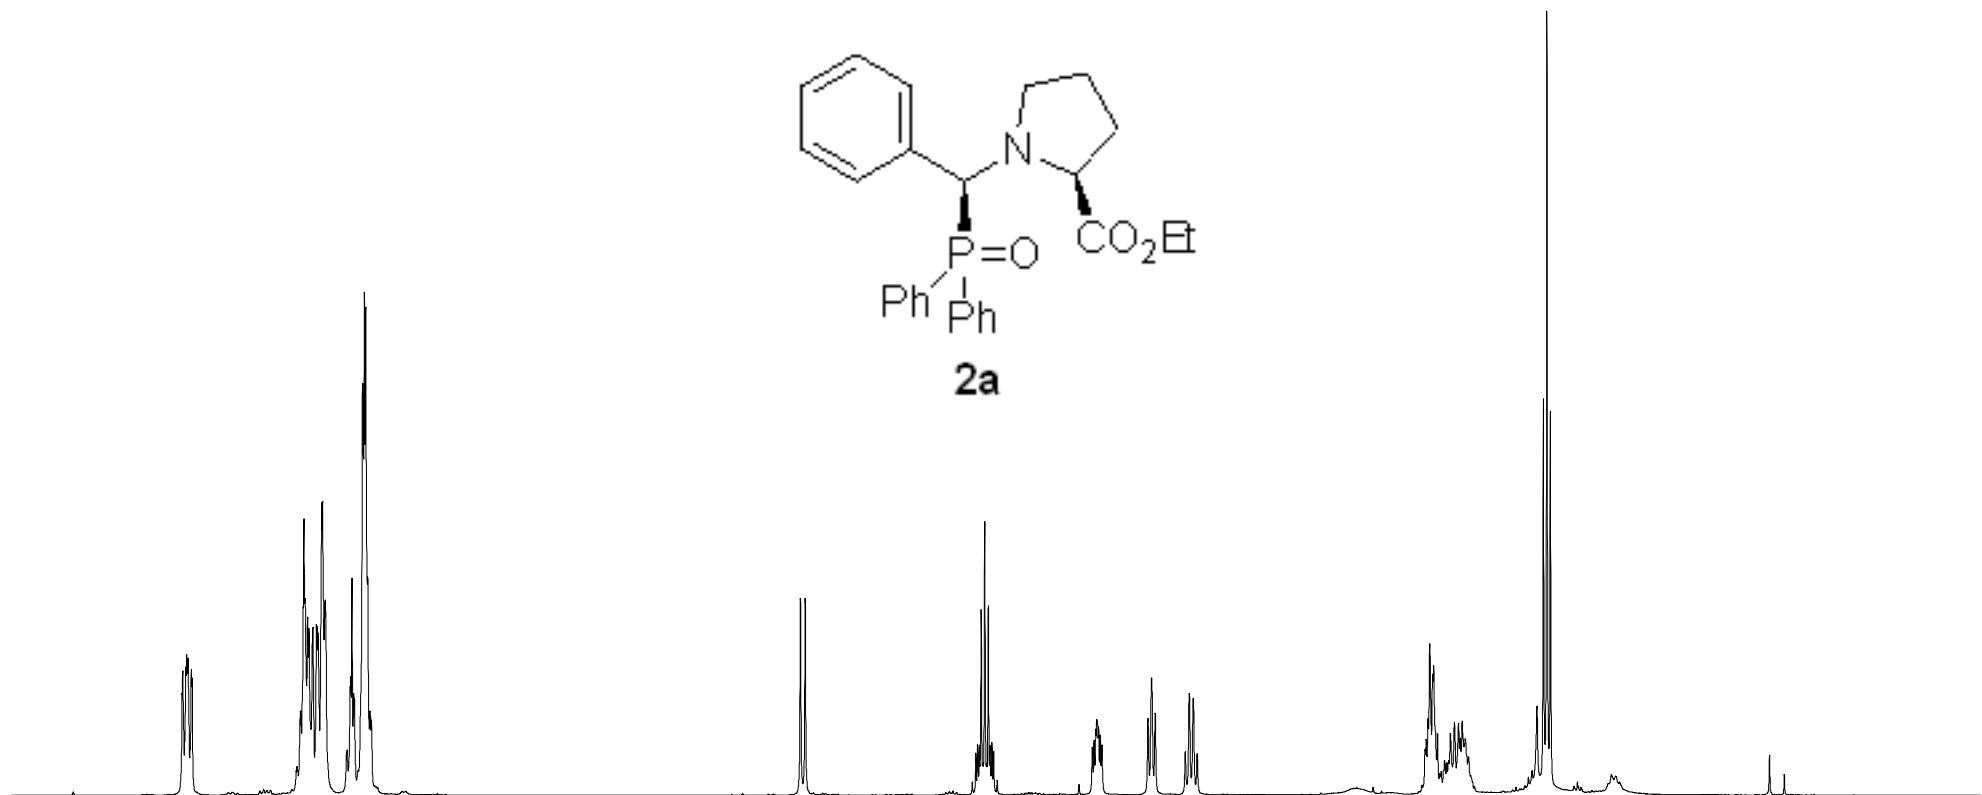

1.96  
7.14  
1.16  
5.05  
0.99  
1.96  
0.99  
1.00  
1.00  
2.04  
2.19  
3.24

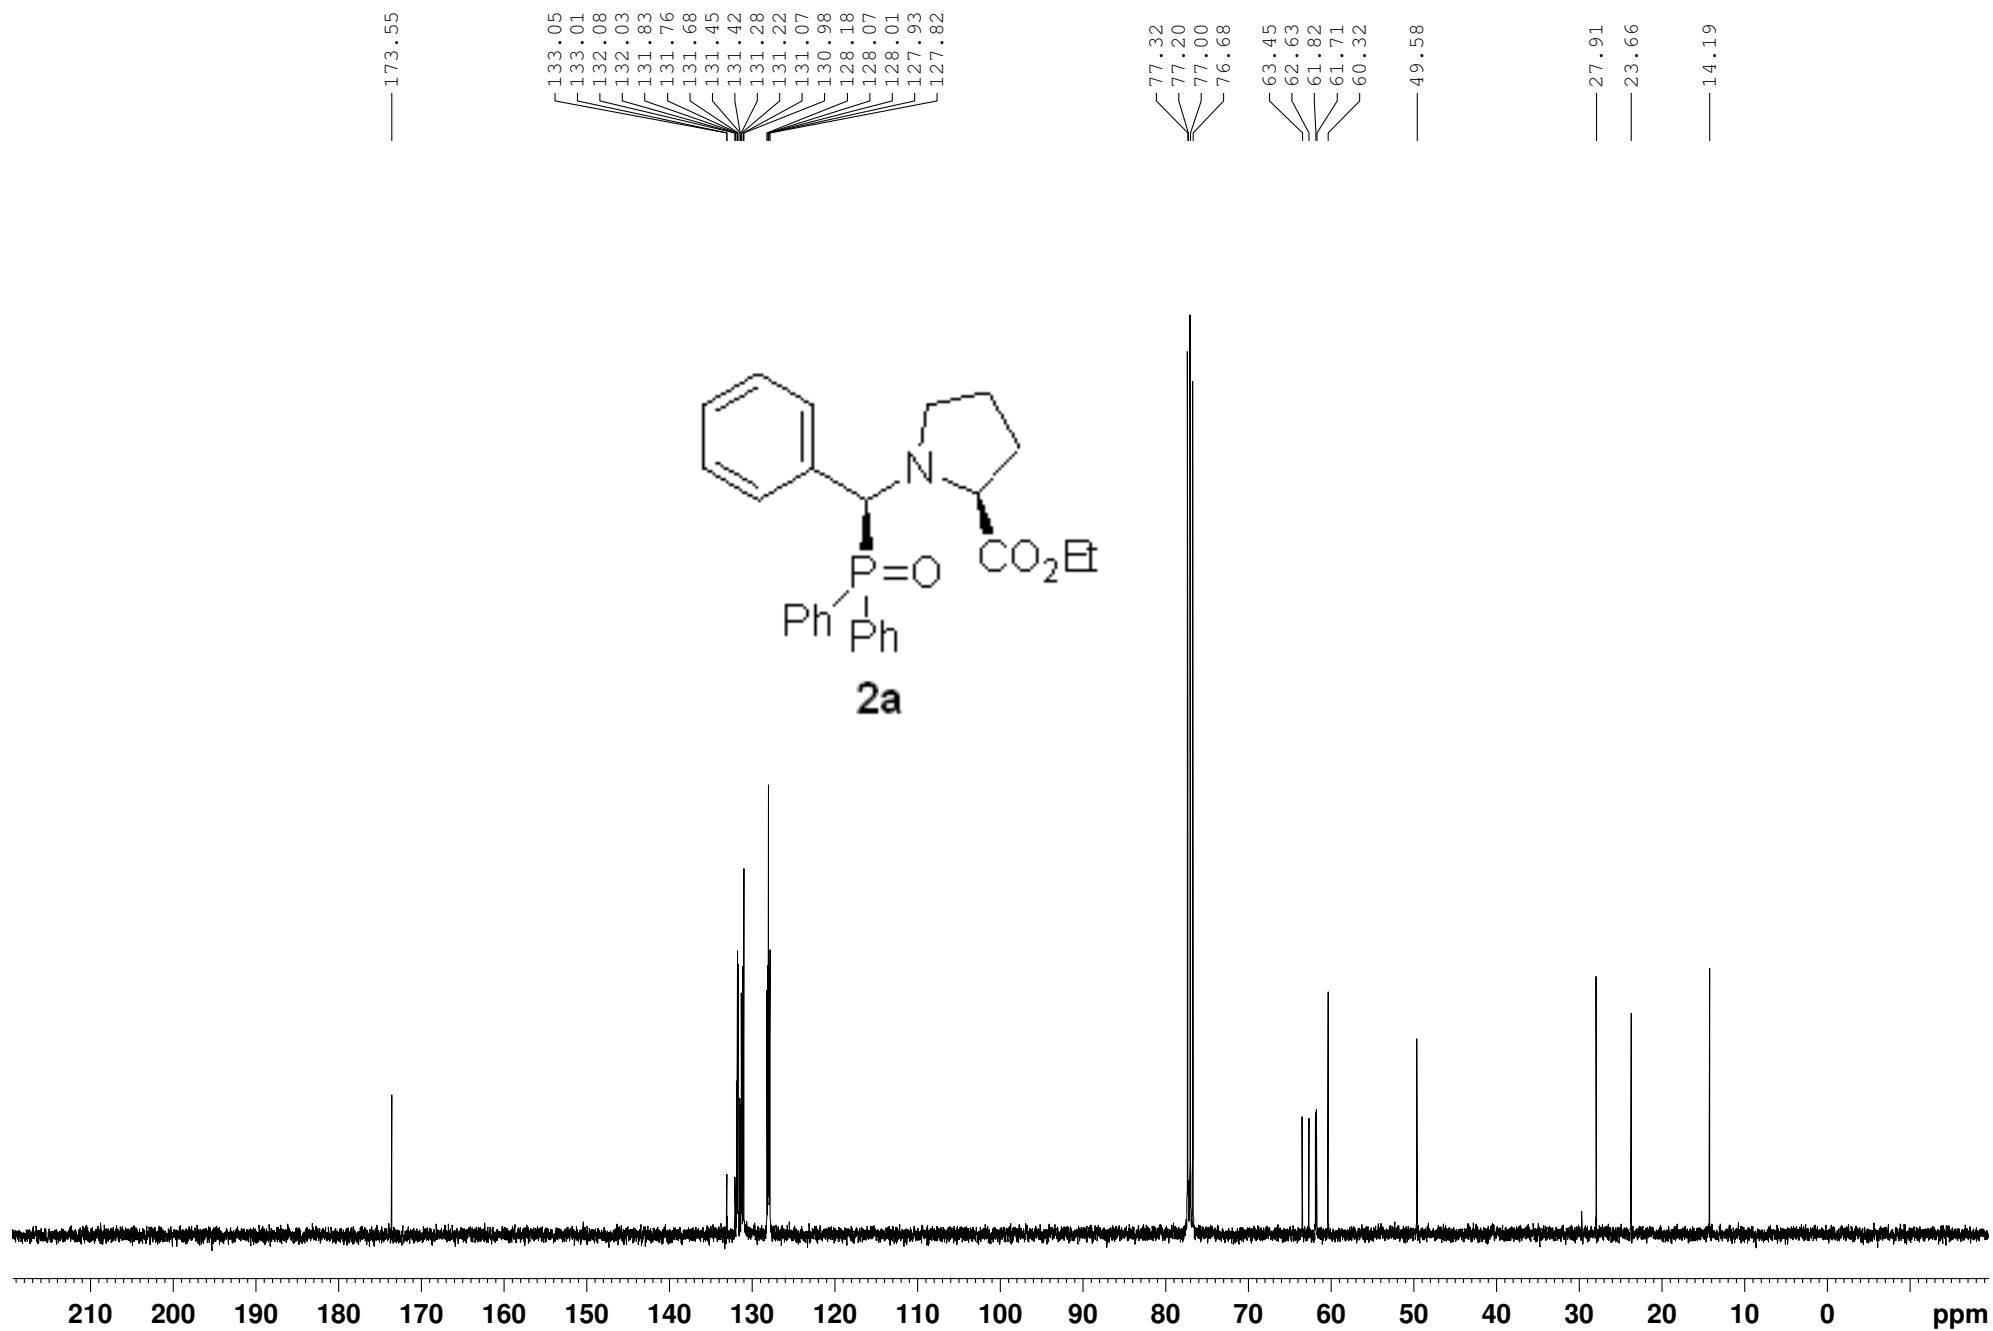

— 30.80

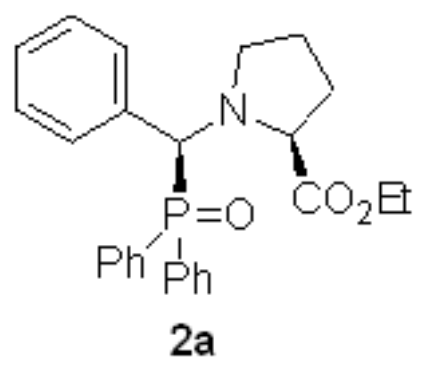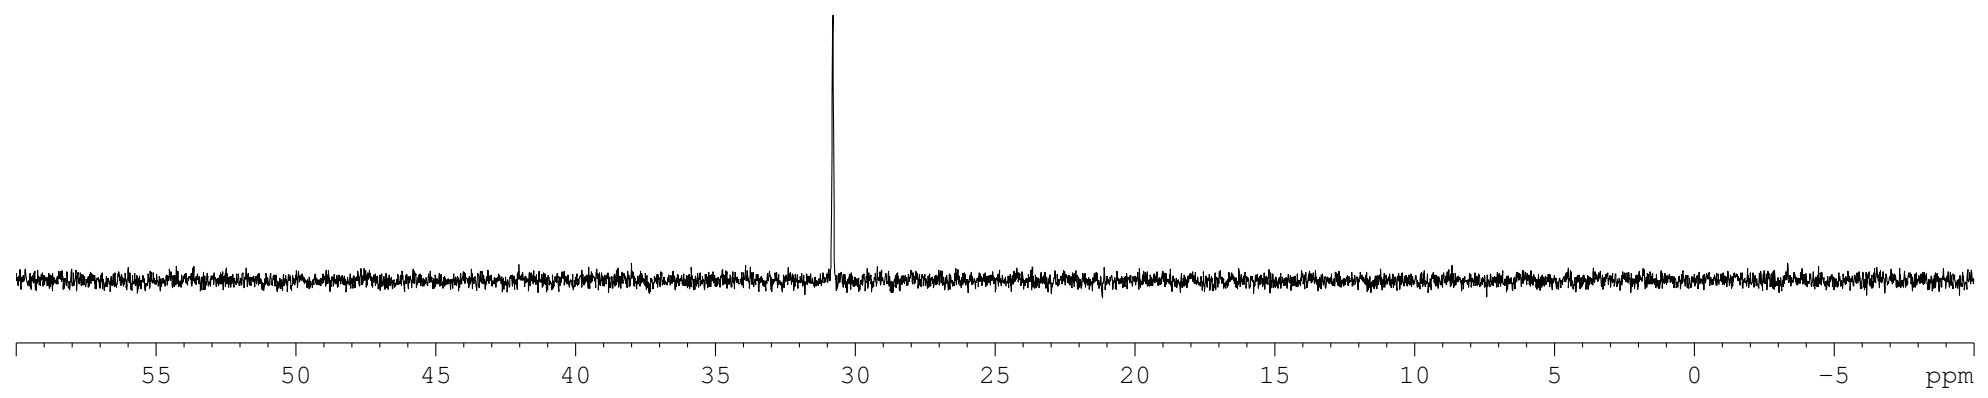



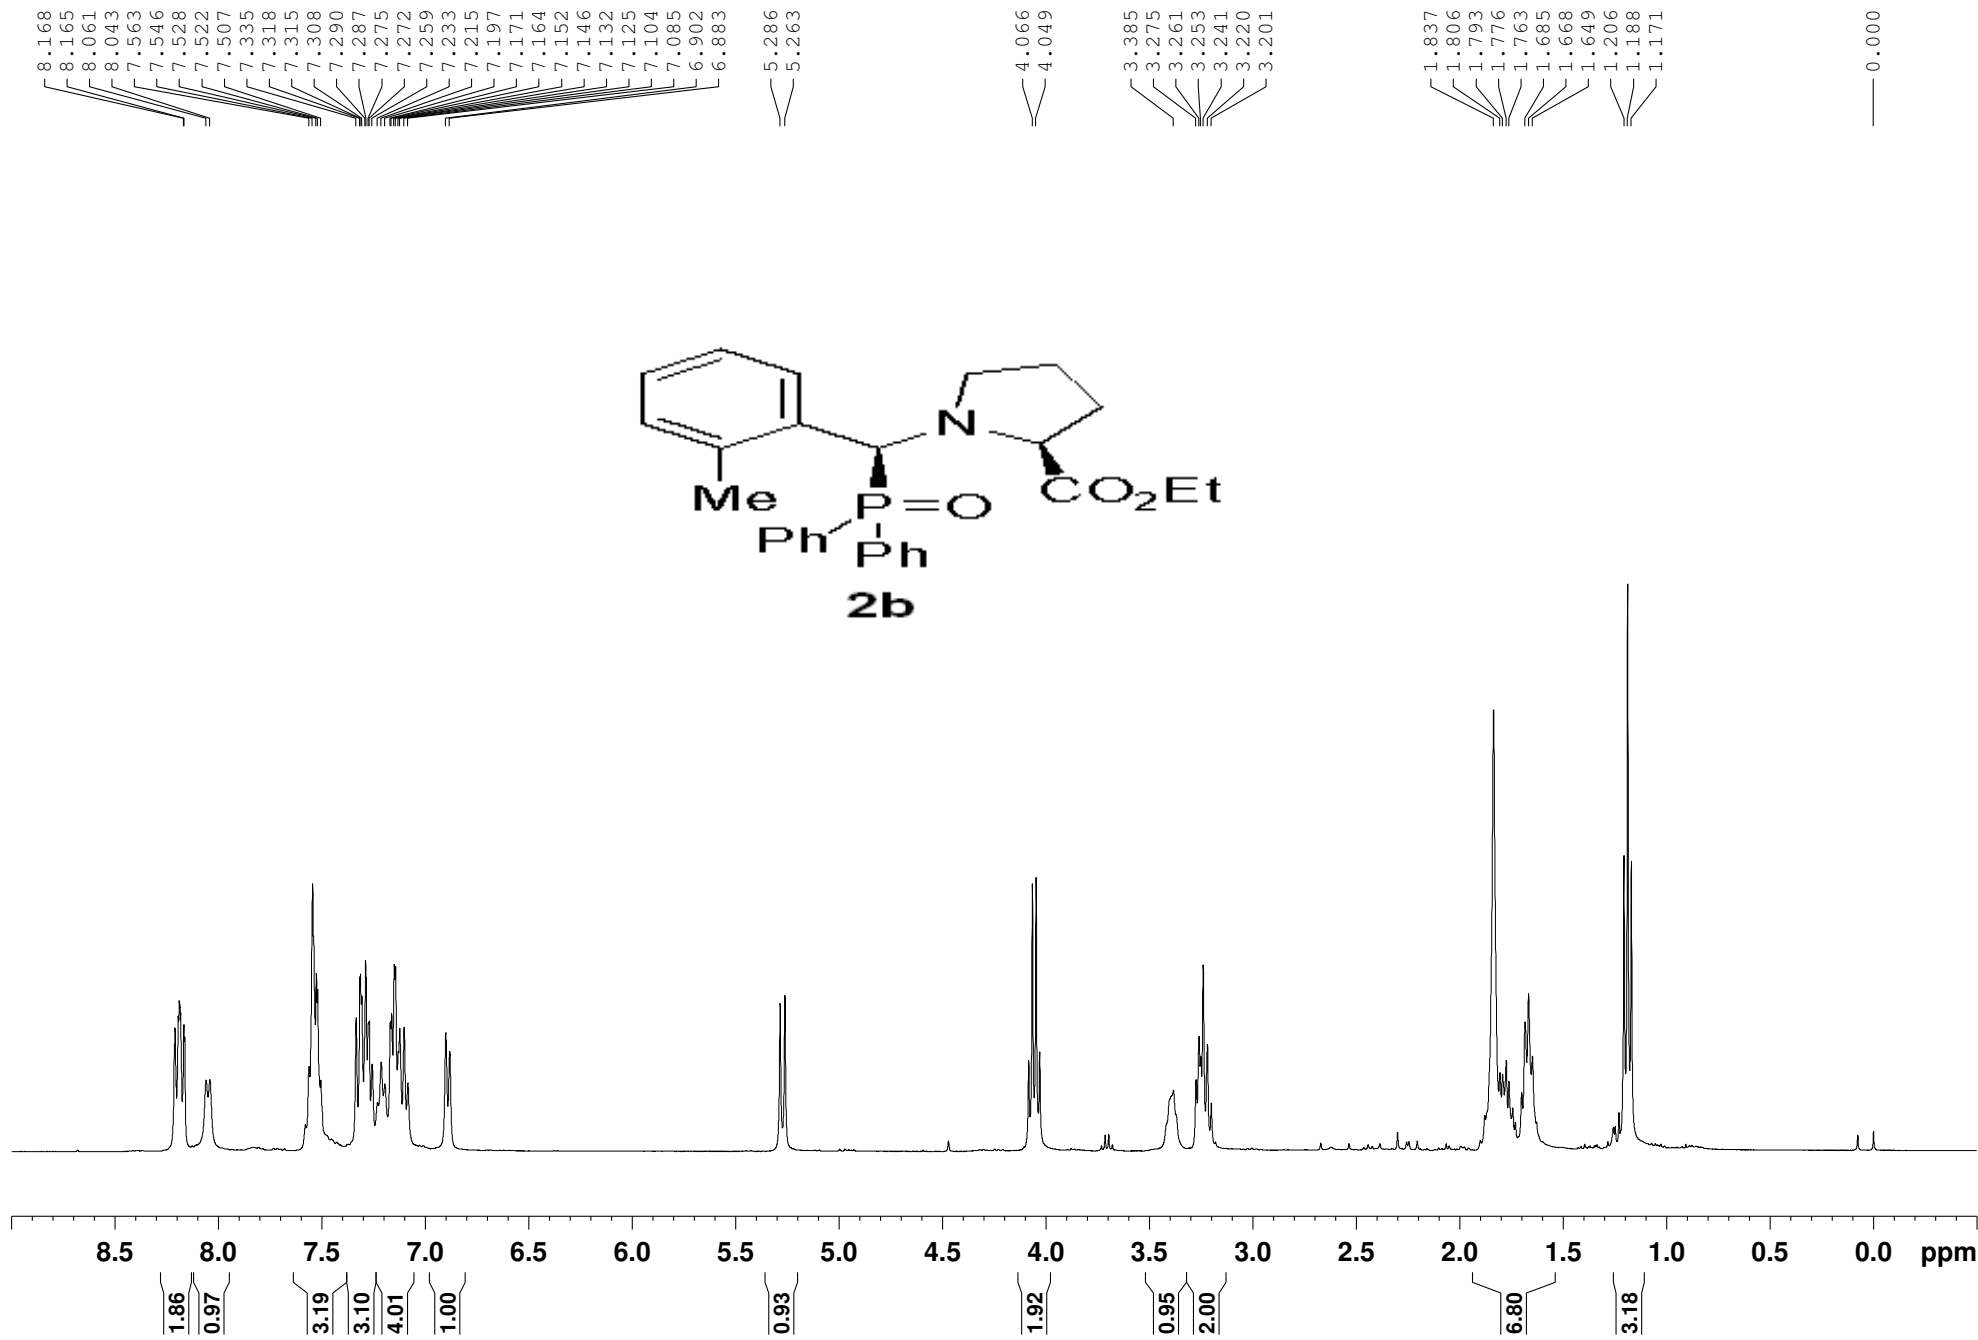

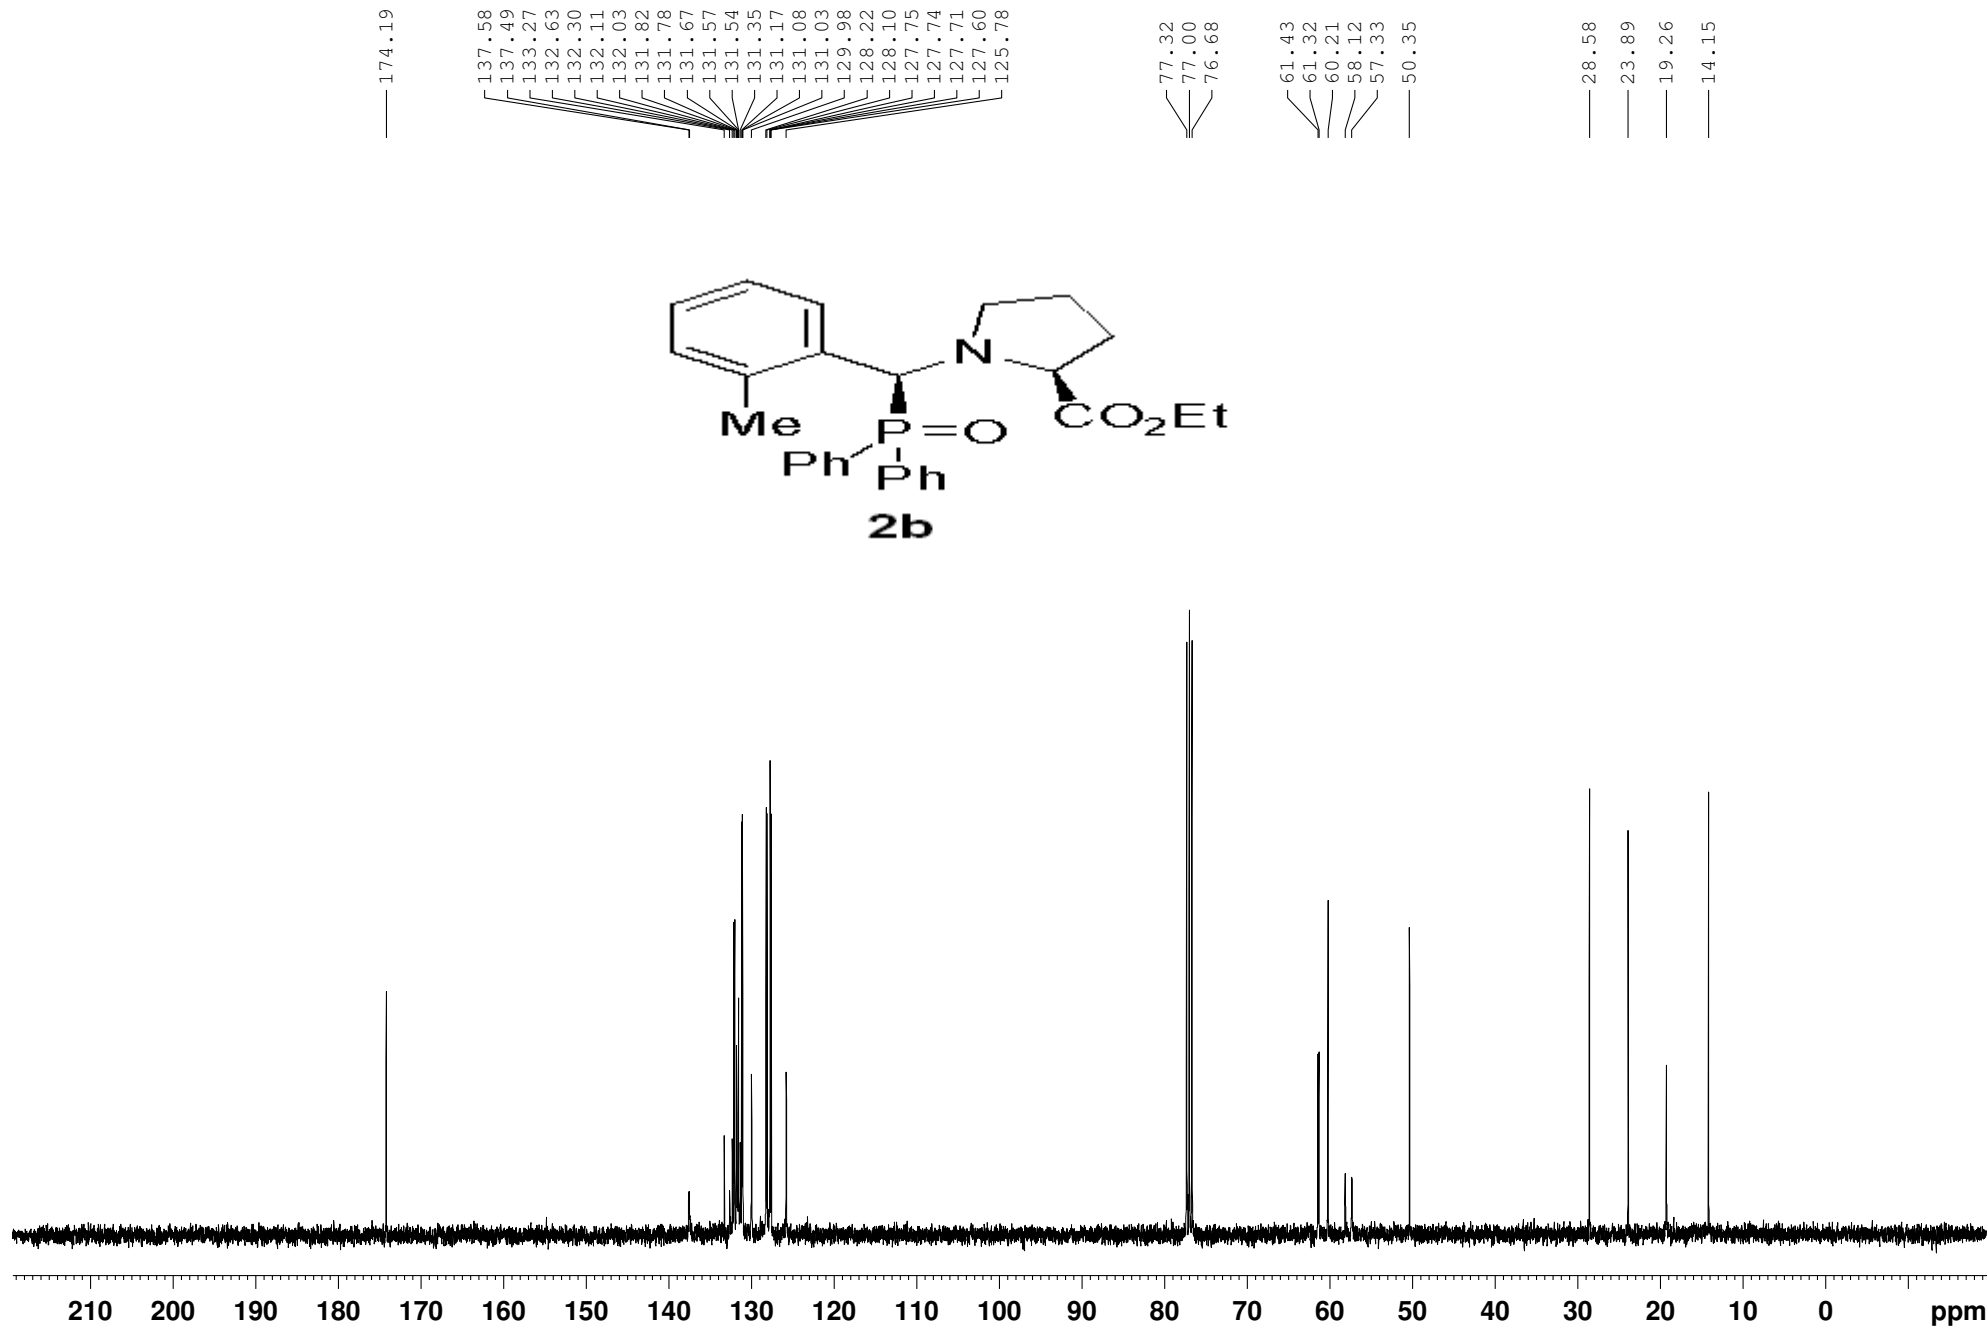

— 30.77

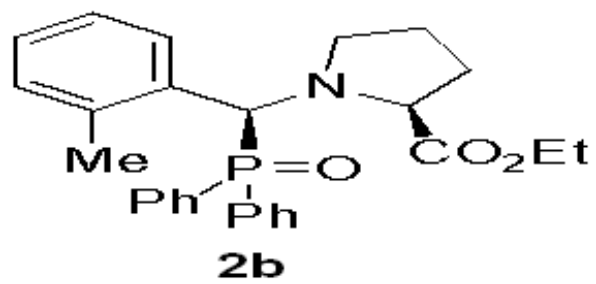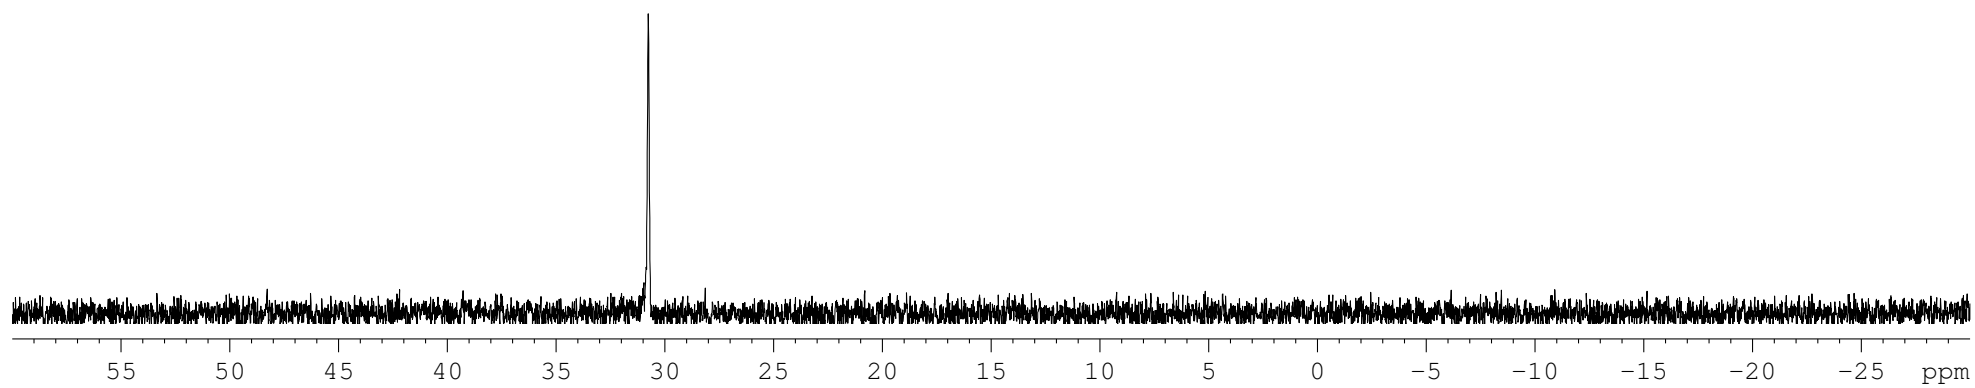

8.13  
8.13  
8.11  
8.11  
8.10  
8.10  
8.09  
8.08  
7.54  
7.52  
7.51  
7.50  
7.49  
7.47  
7.47  
7.46  
7.45  
7.44  
7.29  
7.28  
7.28  
7.27  
7.24  
7.23  
7.22  
7.20  
7.19  
7.13  
7.11  
7.09  
7.03  
7.01  
4.97  
4.95  
4.12  
4.11  
4.10  
4.08  
4.06  
4.04  
4.03  
4.02  
3.50  
3.49  
3.49  
3.48  
3.48  
3.47  
3.46  
3.27  
3.25  
3.23  
3.04  
3.02  
2.26  
1.83  
1.81  
1.80  
1.78  
1.78  
1.71  
1.69  
1.66  
1.65  
1.64  
1.63  
1.24  
1.22  
1.20

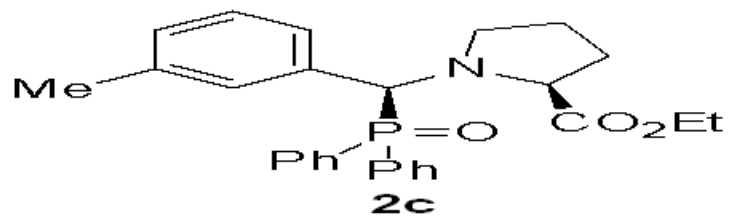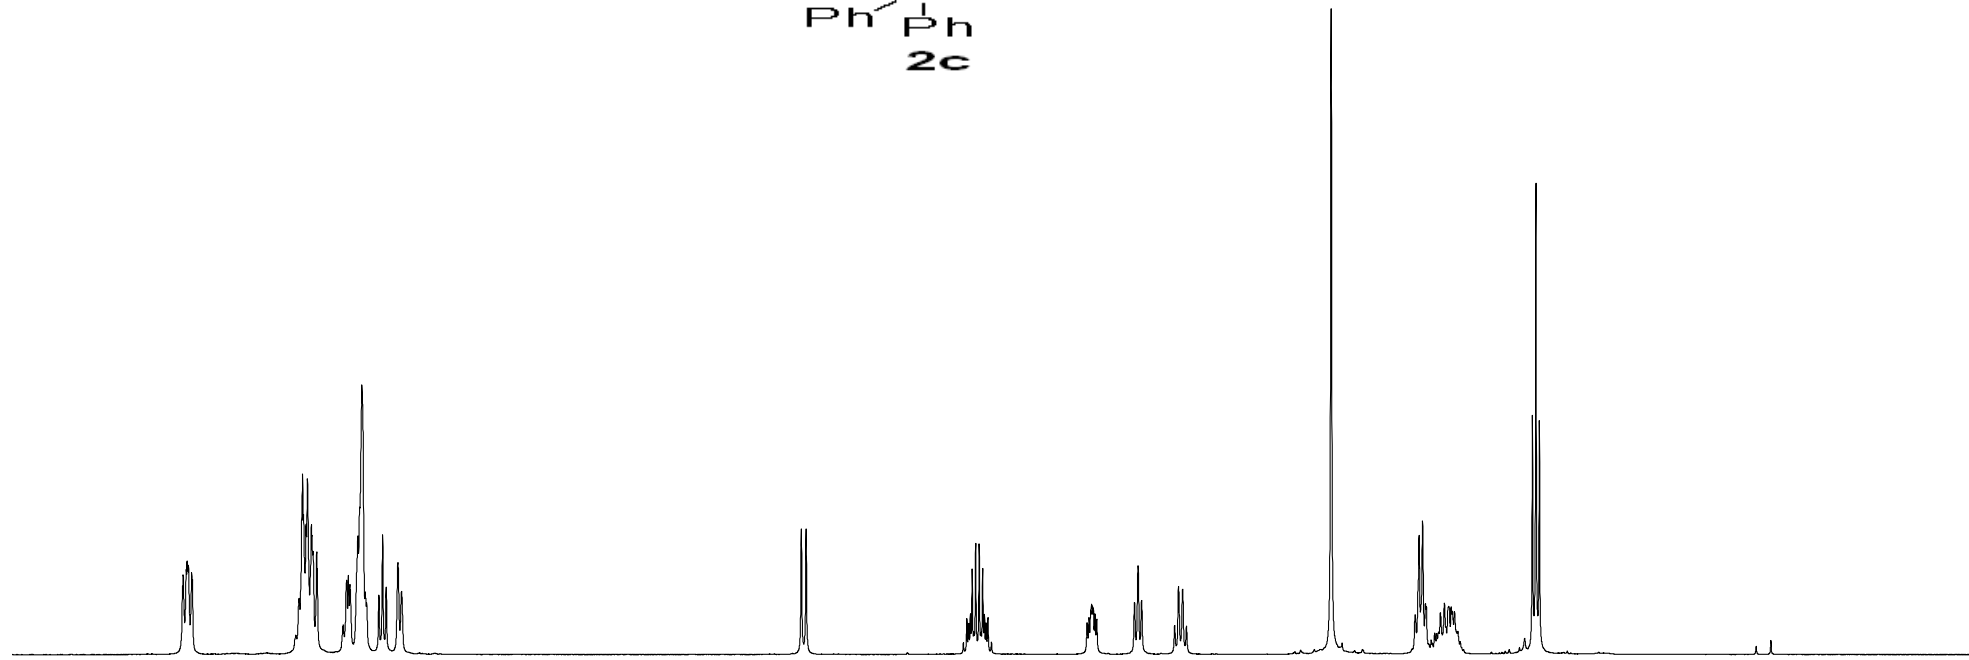

8.5 8.0 7.5 7.0 6.5 6.0 5.5 5.0 4.5 4.0 3.5 3.0 2.5 2.0 1.5 1.0 0.5 0.0 -0.5 ppm

1.98  
5.12  
1.23  
3.98  
1.06  
1.05  
0.98  
1.98  
1.00  
1.01  
1.00  
3.15  
2.01  
2.06  
3.01

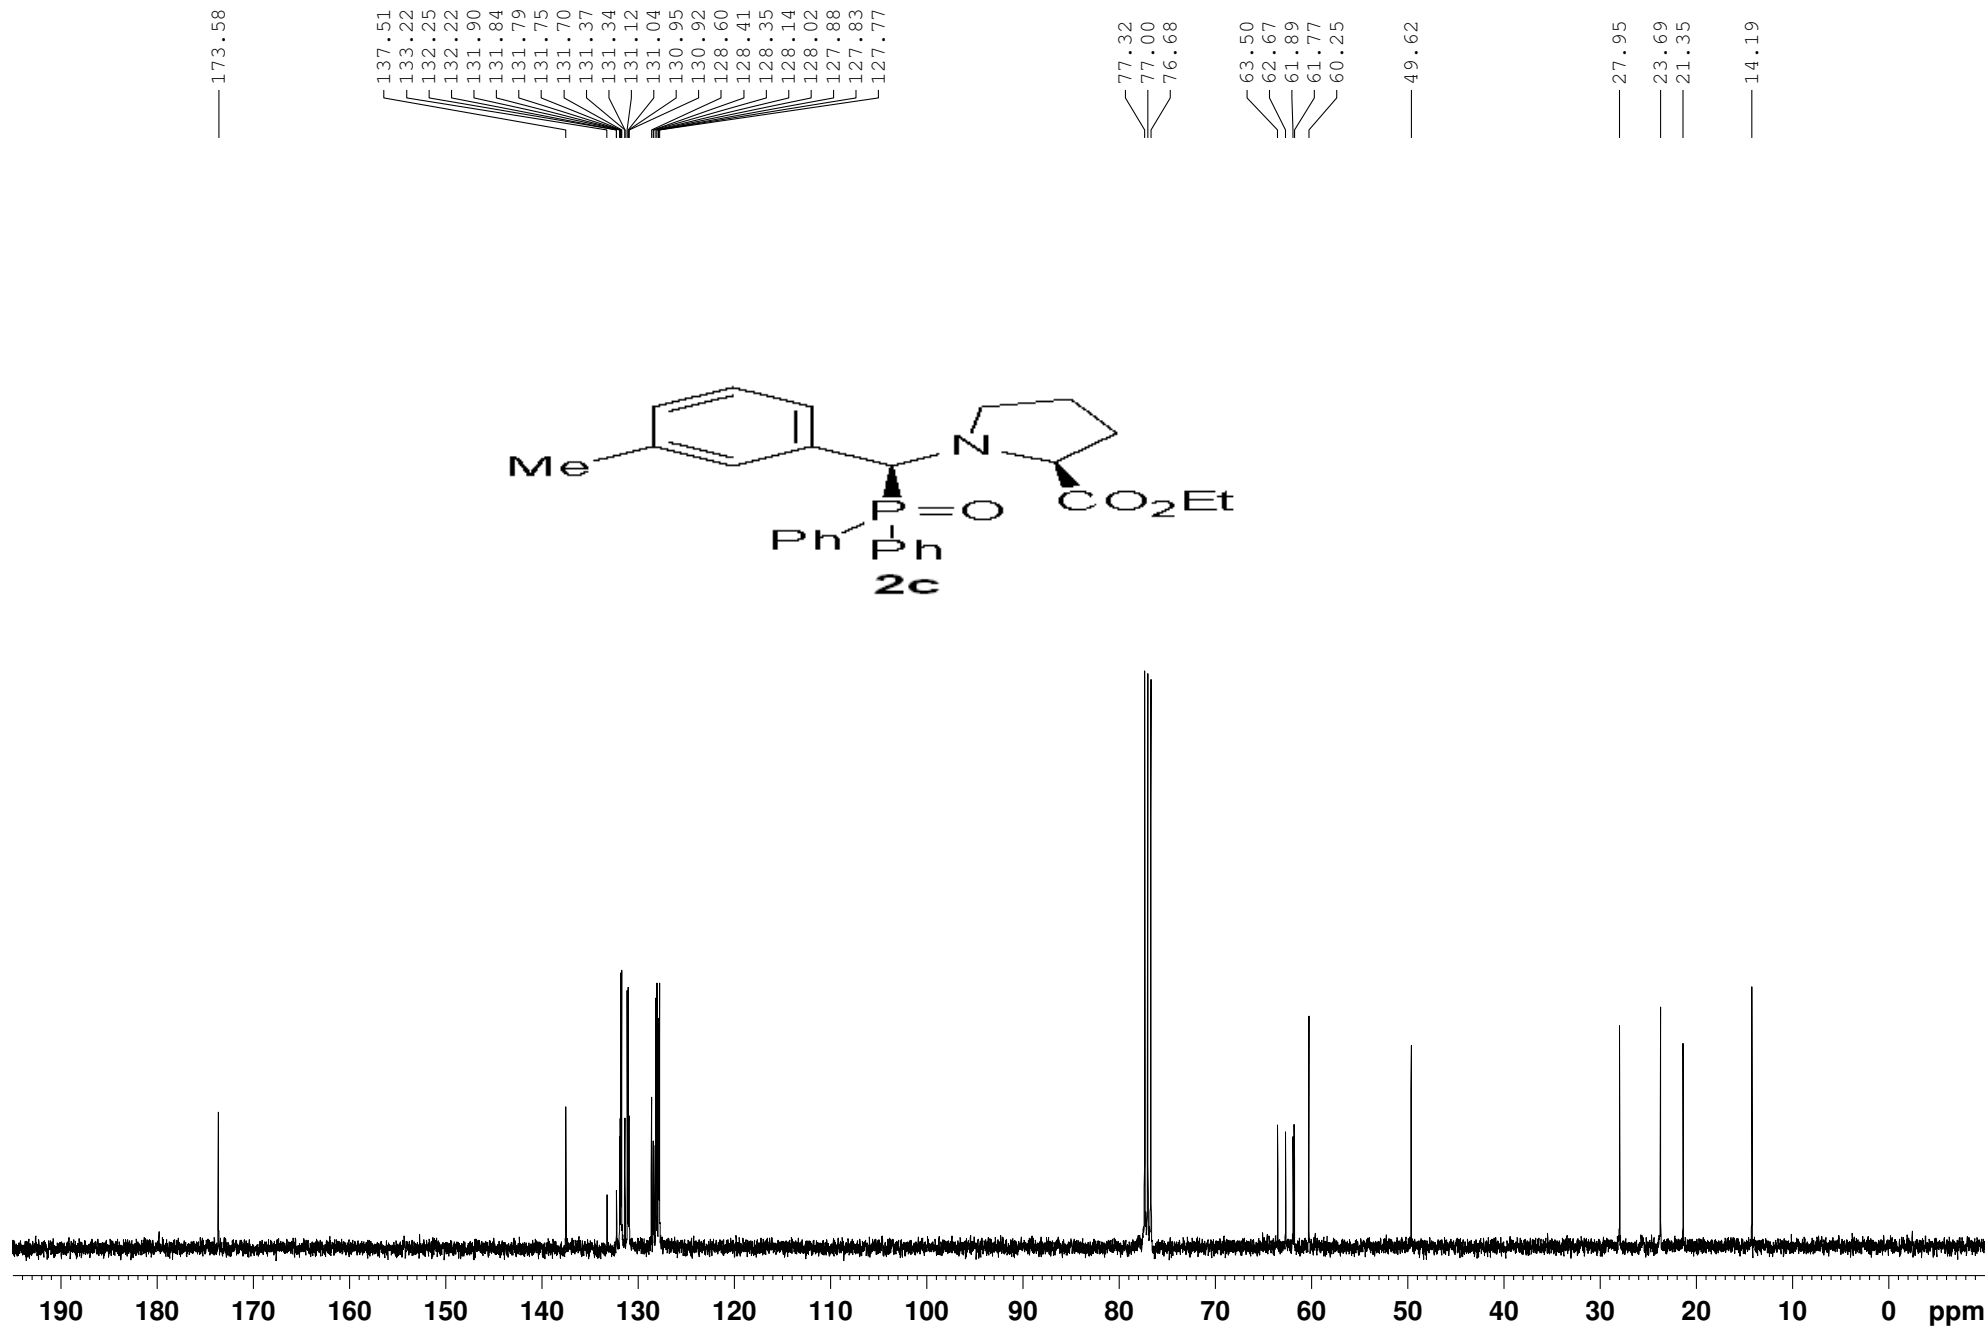

— 30.69

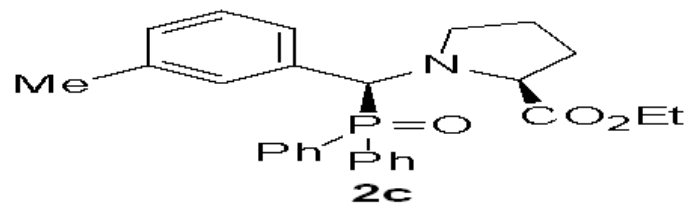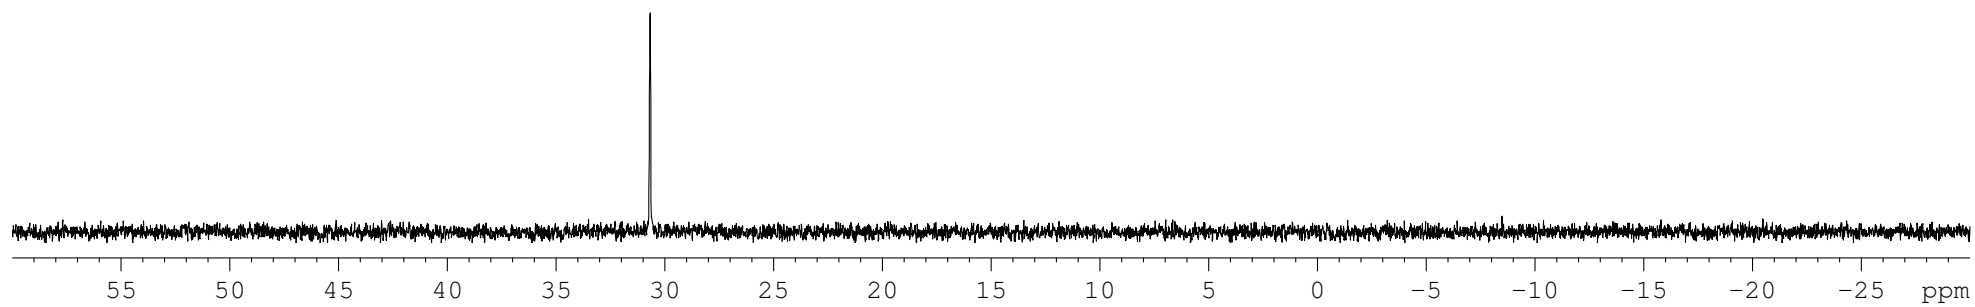

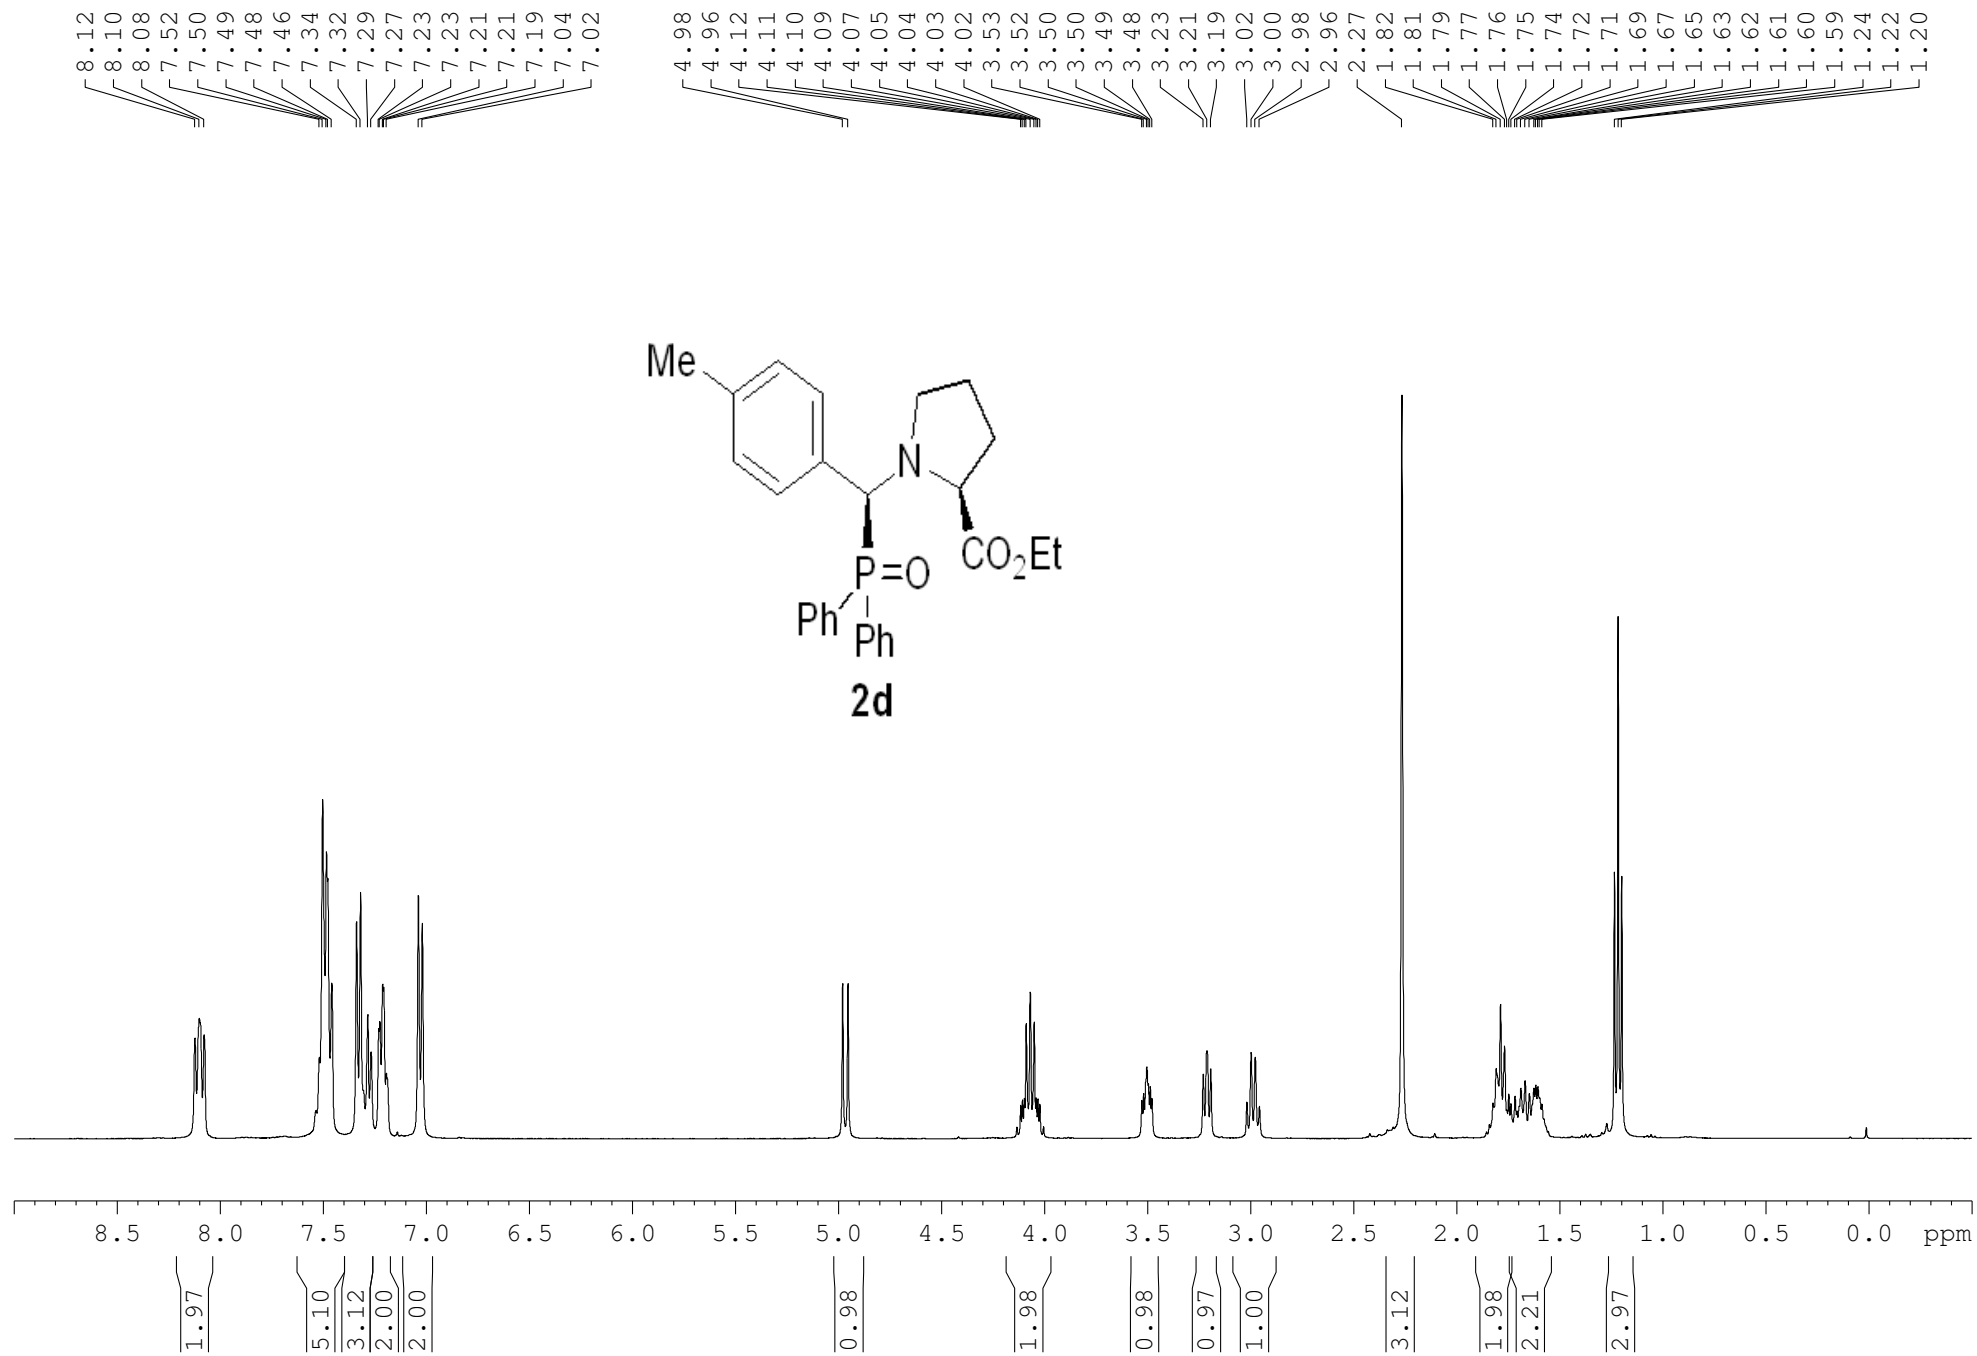

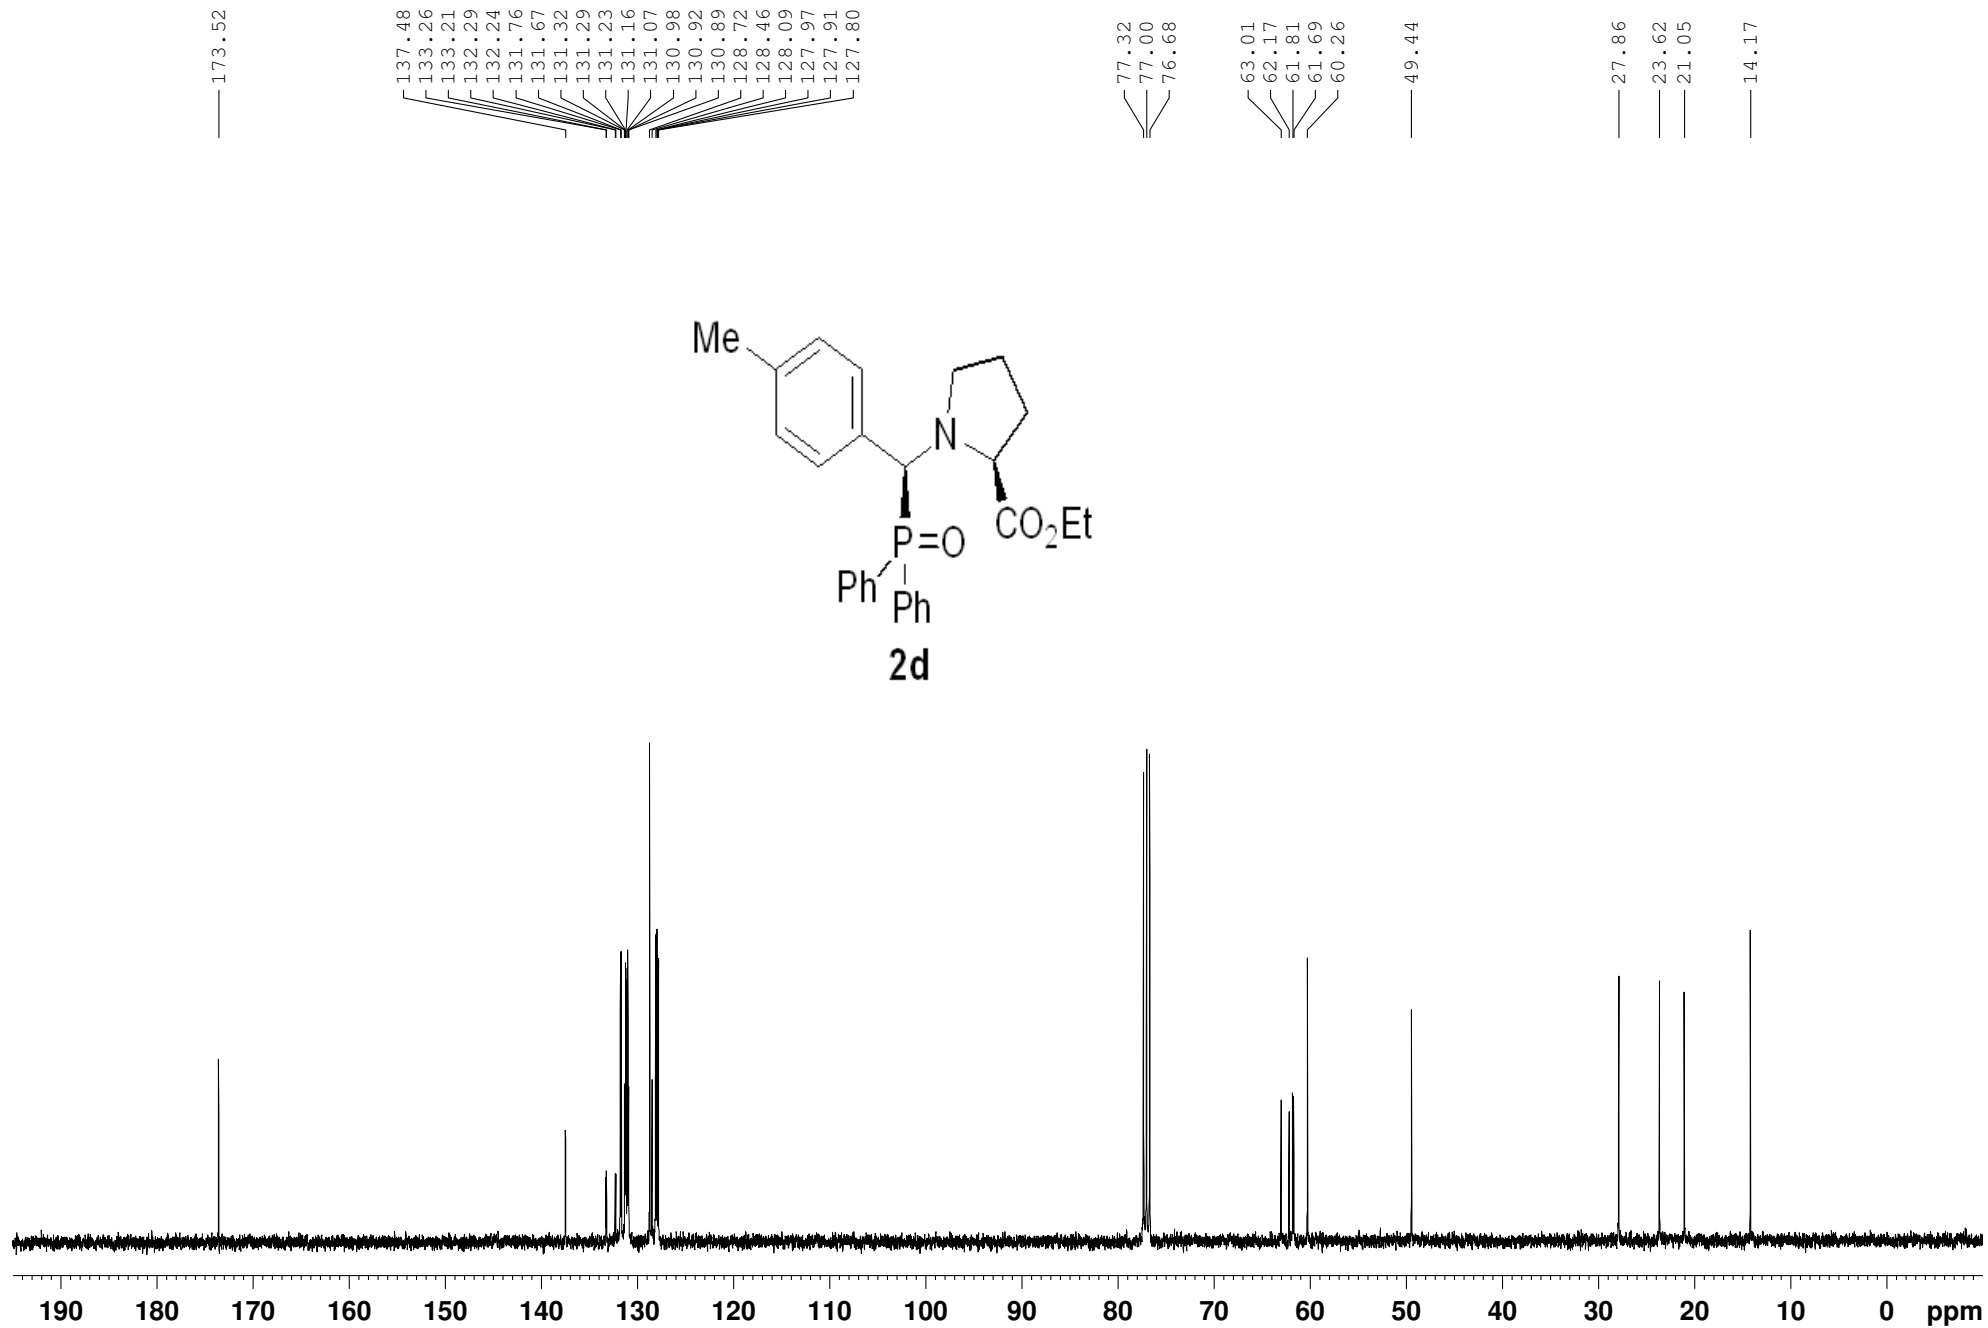



— 30.87

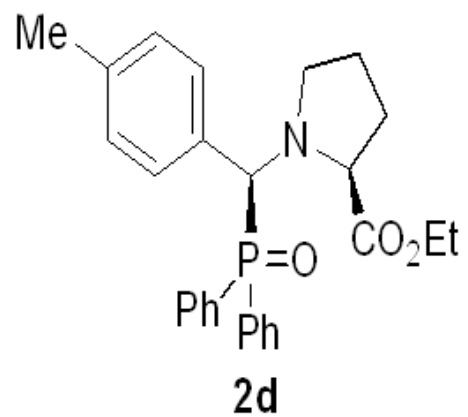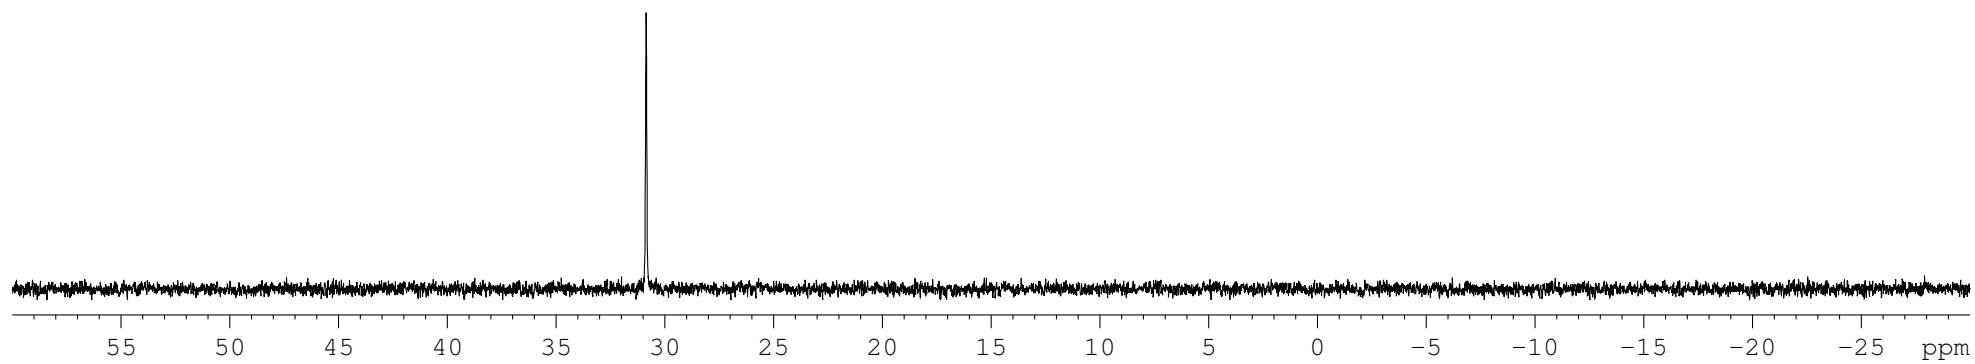

8.202  
8.198  
8.183  
8.178  
7.527  
7.523  
7.508  
7.504  
7.498  
7.480  
7.477  
7.284  
7.281  
7.277  
7.266  
7.262  
7.256  
7.238  
7.222  
7.219  
7.215  
7.202  
7.198  
7.195  
7.184  
7.166  
7.147  
7.129  
7.111  
5.741  
5.714

4.090  
4.072  
4.055  
4.037  
3.604  
3.596  
3.589  
3.583  
3.574  
3.242  
3.229  
3.220  
3.205  
2.993  
2.973  
1.872  
1.862  
1.851  
1.841  
1.828  
1.819  
1.799  
1.787  
1.778  
1.775  
1.767  
1.754  
1.734  
1.715  
1.706  
1.697  
1.686  
1.678  
1.666  
1.656  
1.647  
1.637  
1.627  
1.617  
1.607  
1.204  
1.186

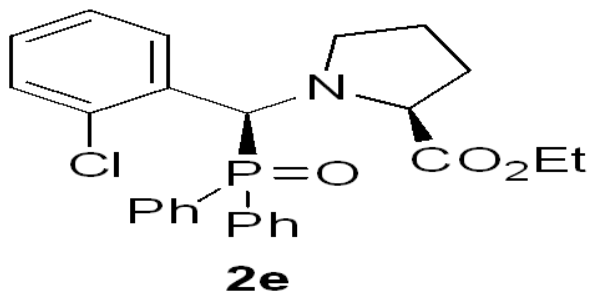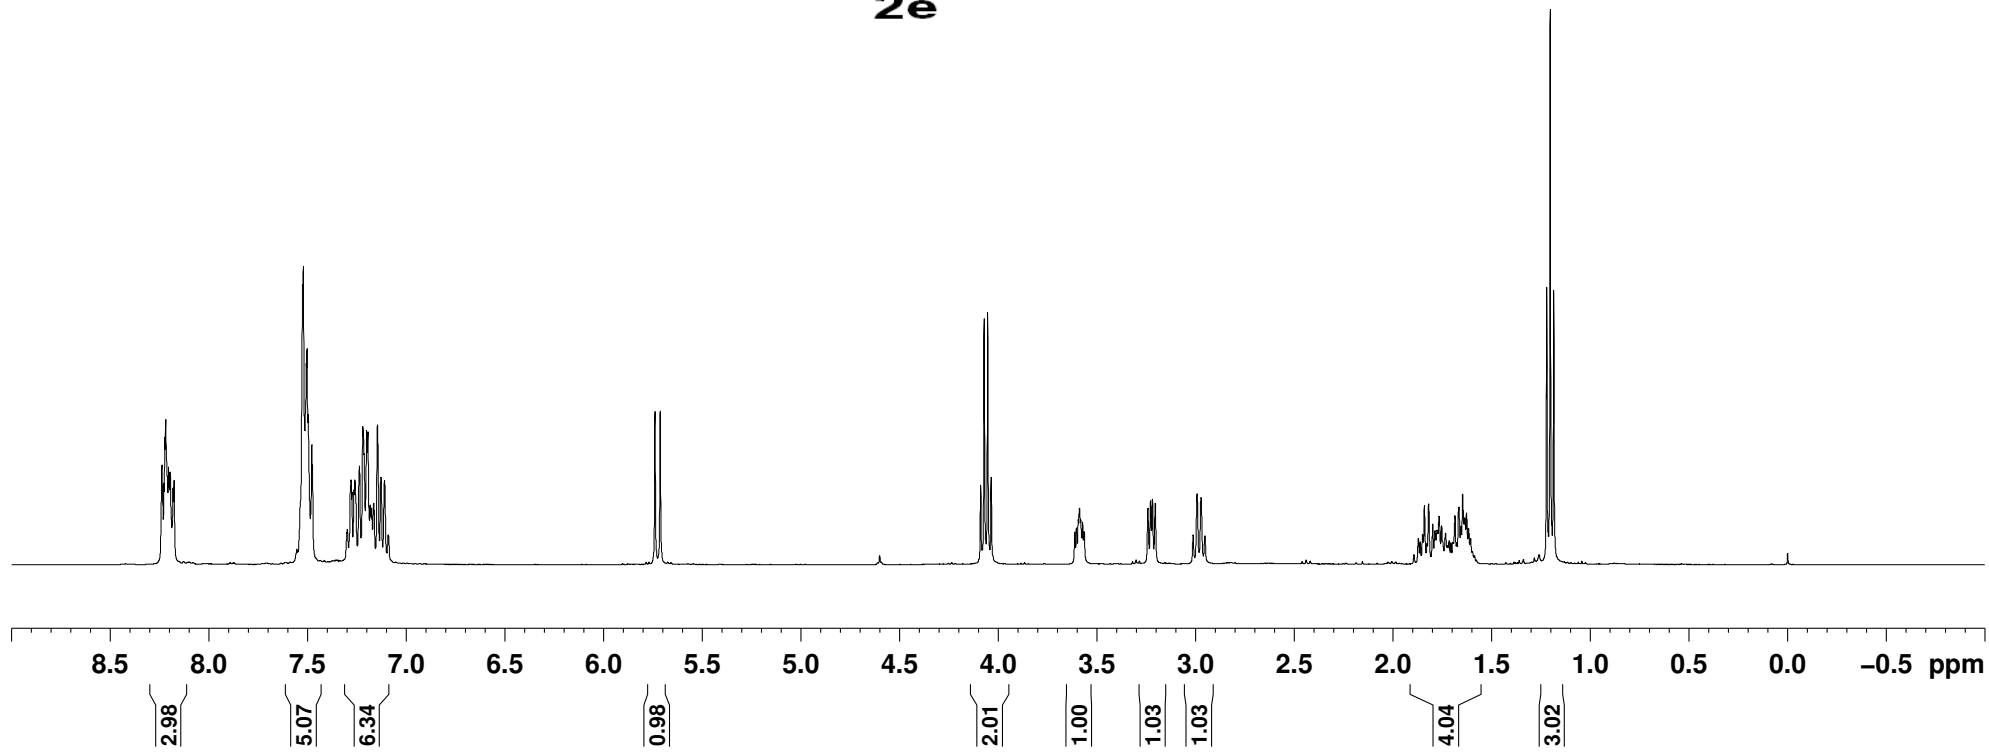

— 173.64

135.47  
135.38  
133.23  
133.19  
132.81  
132.47  
131.89  
131.80  
131.56  
131.53  
131.50  
131.17  
131.14  
130.90  
130.81  
130.26  
130.24  
129.12  
128.17  
128.05  
127.88  
127.76  
126.48  
126.47

77.32  
77.00  
76.68

61.69  
61.57  
60.24  
57.77  
56.94

— 49.53

— 28.41

— 23.38

— 14.15

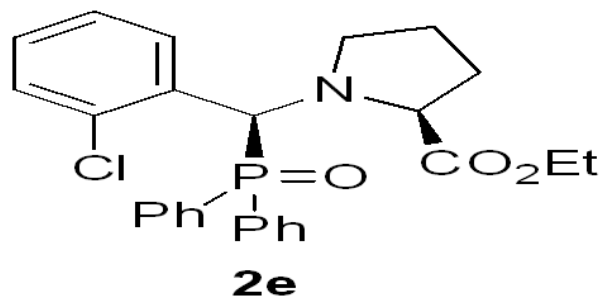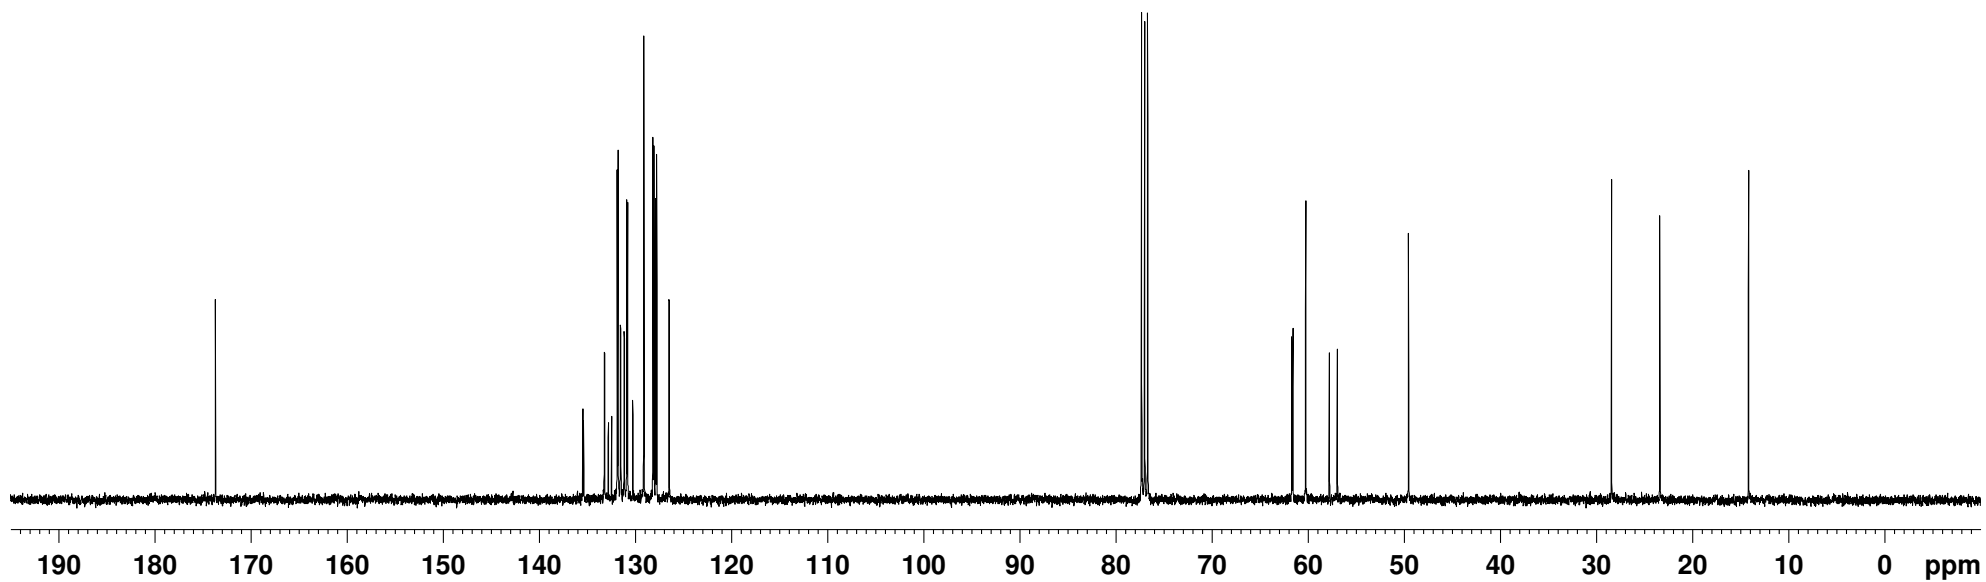

— 31.52

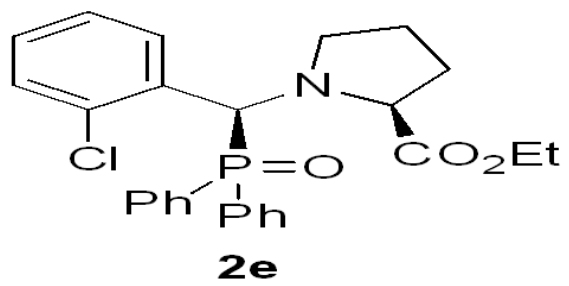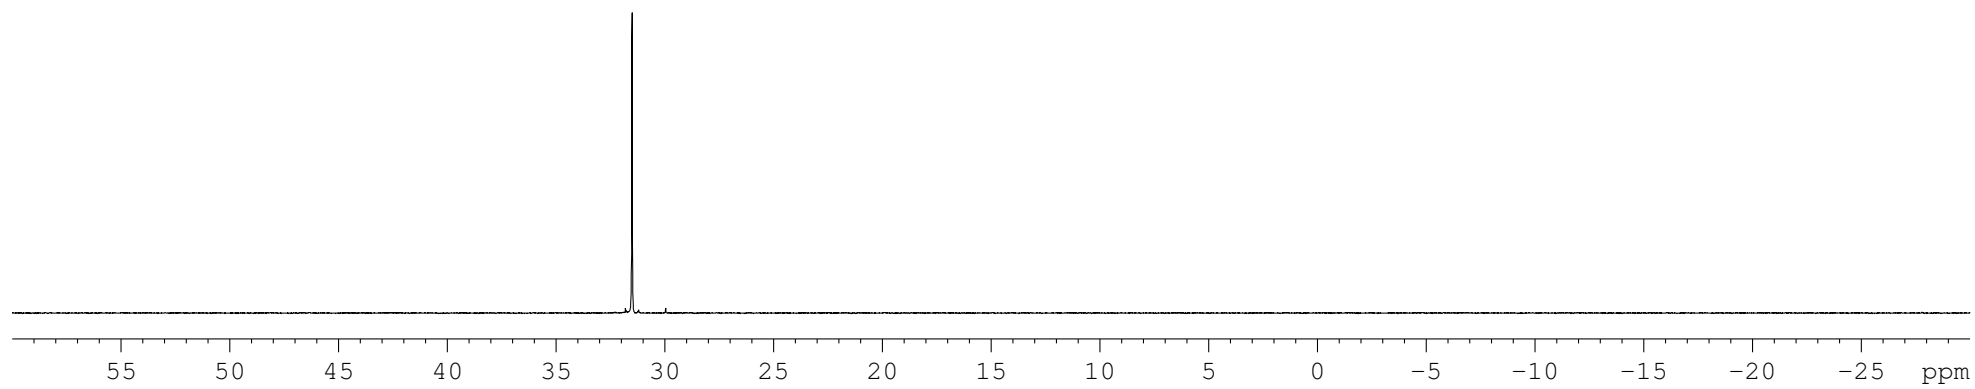

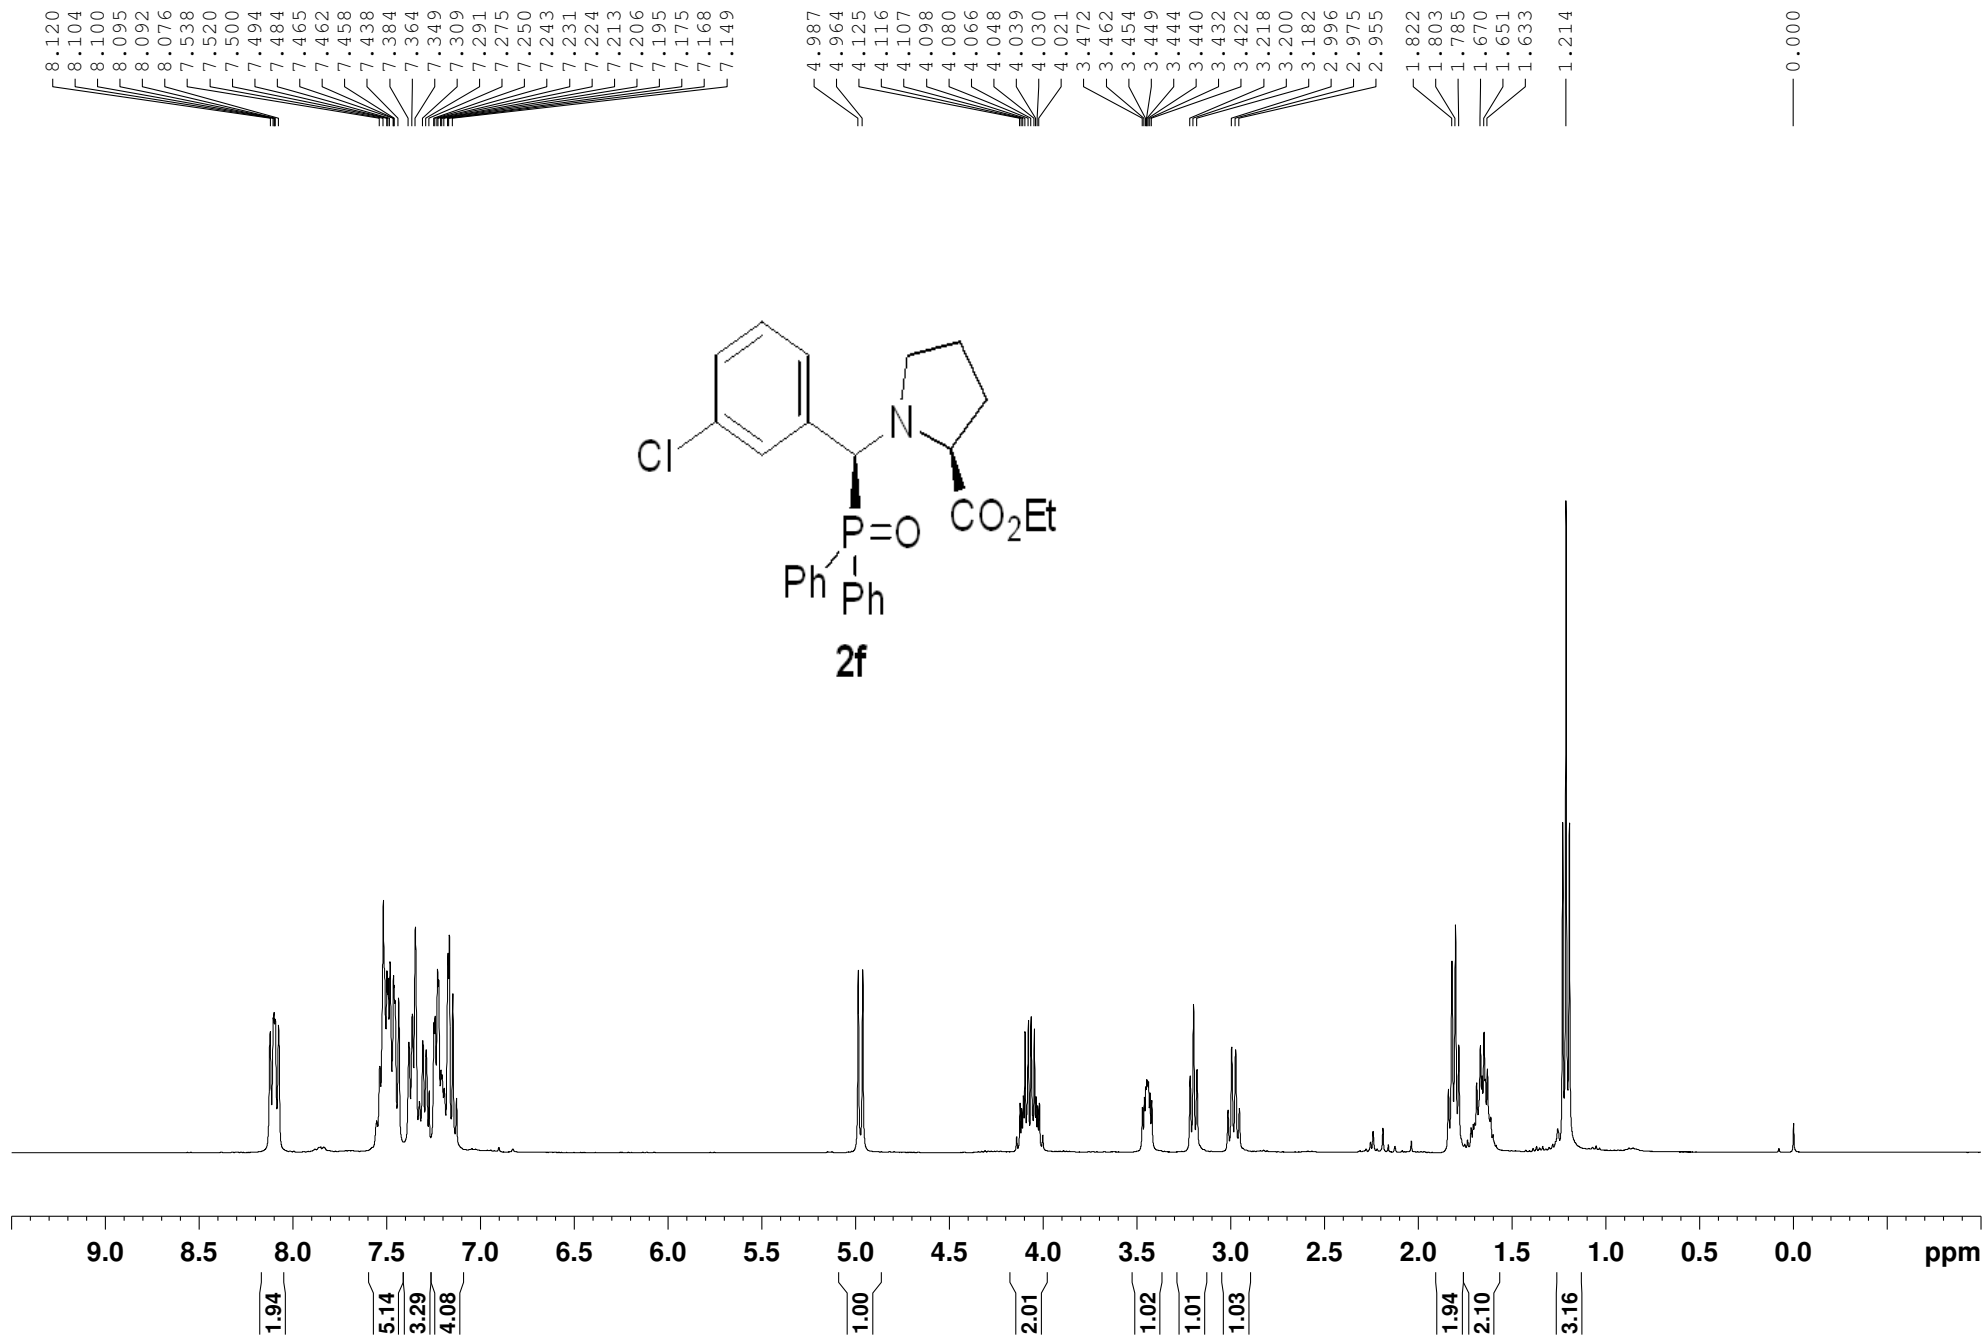

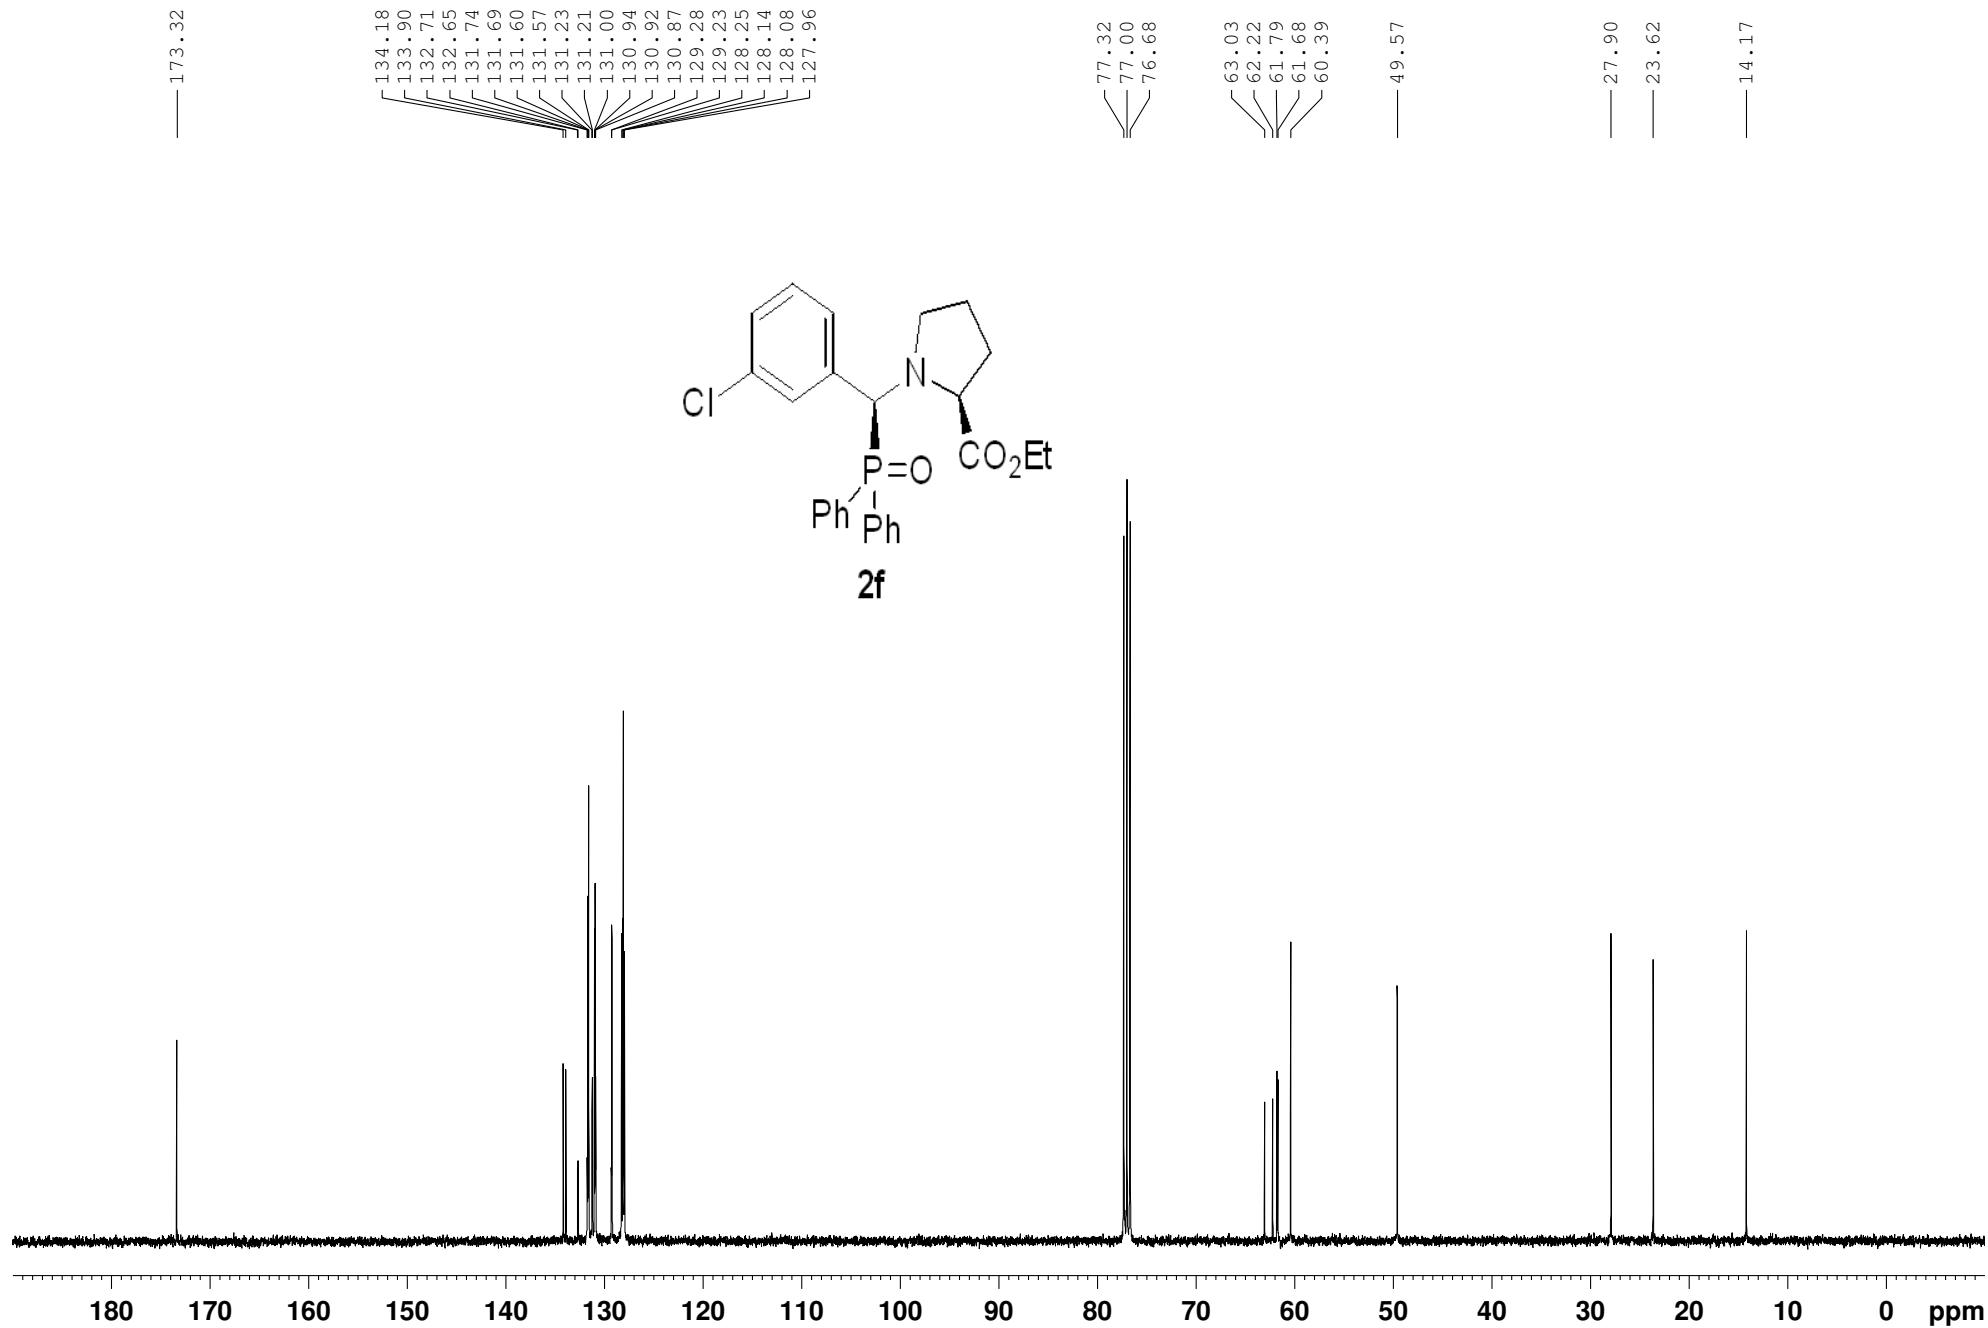

— 30.27

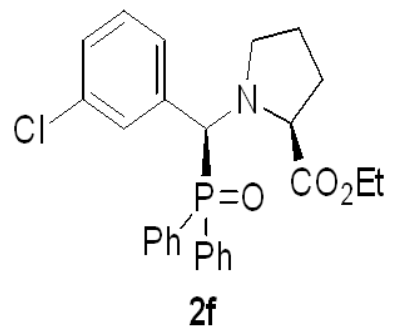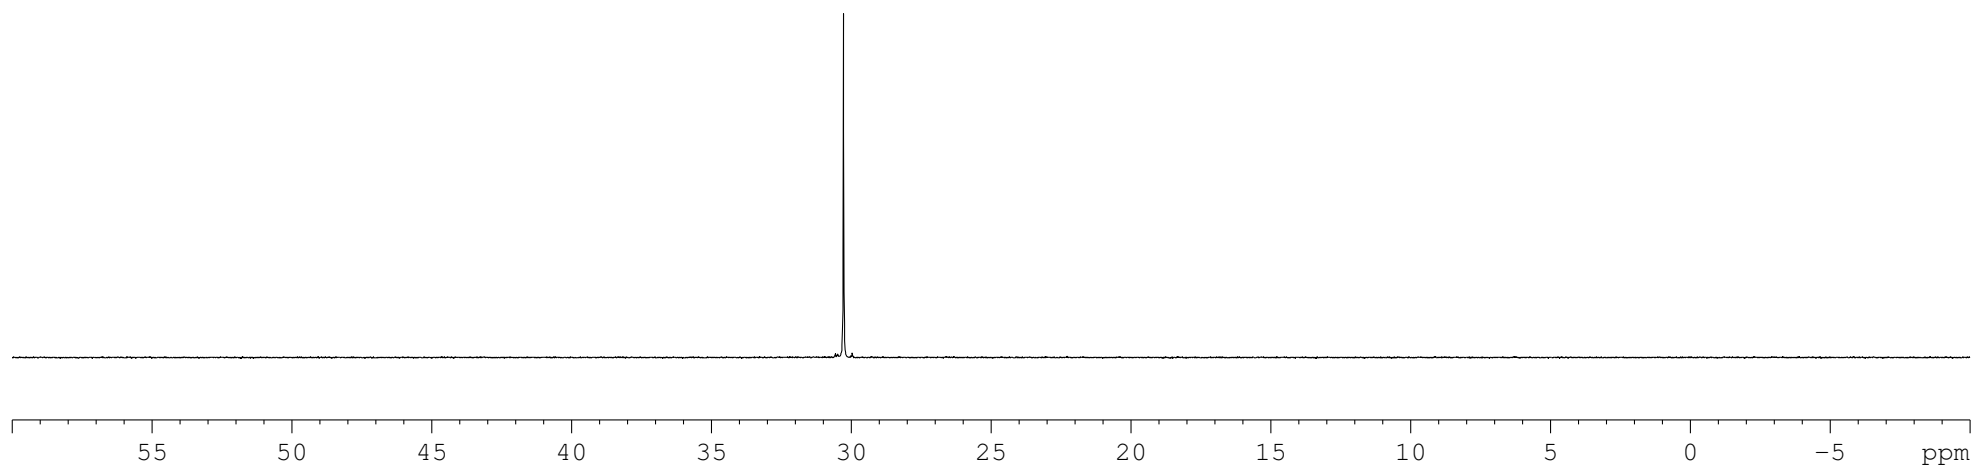

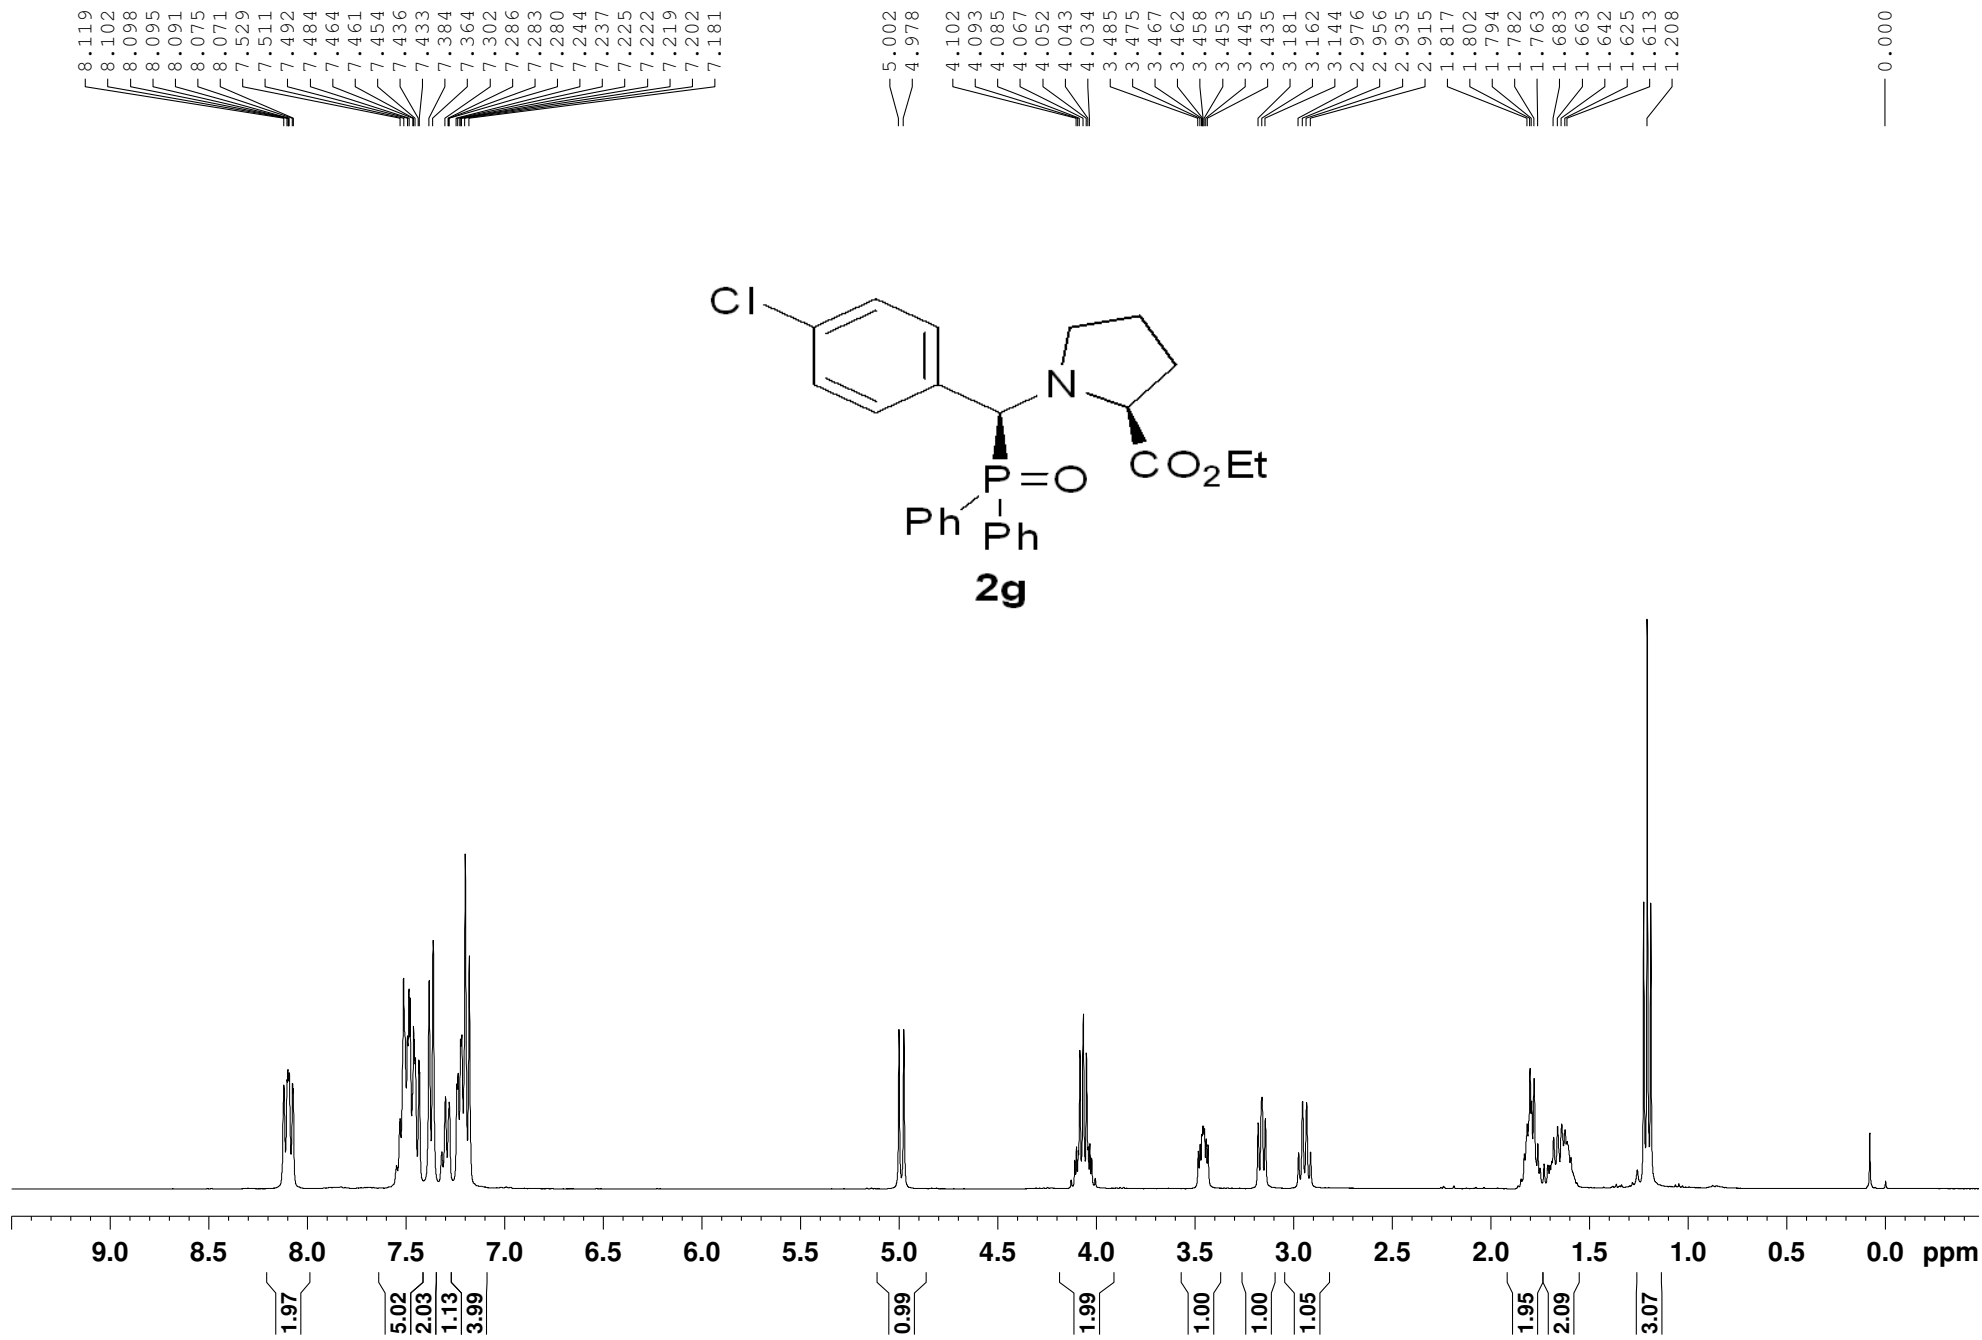



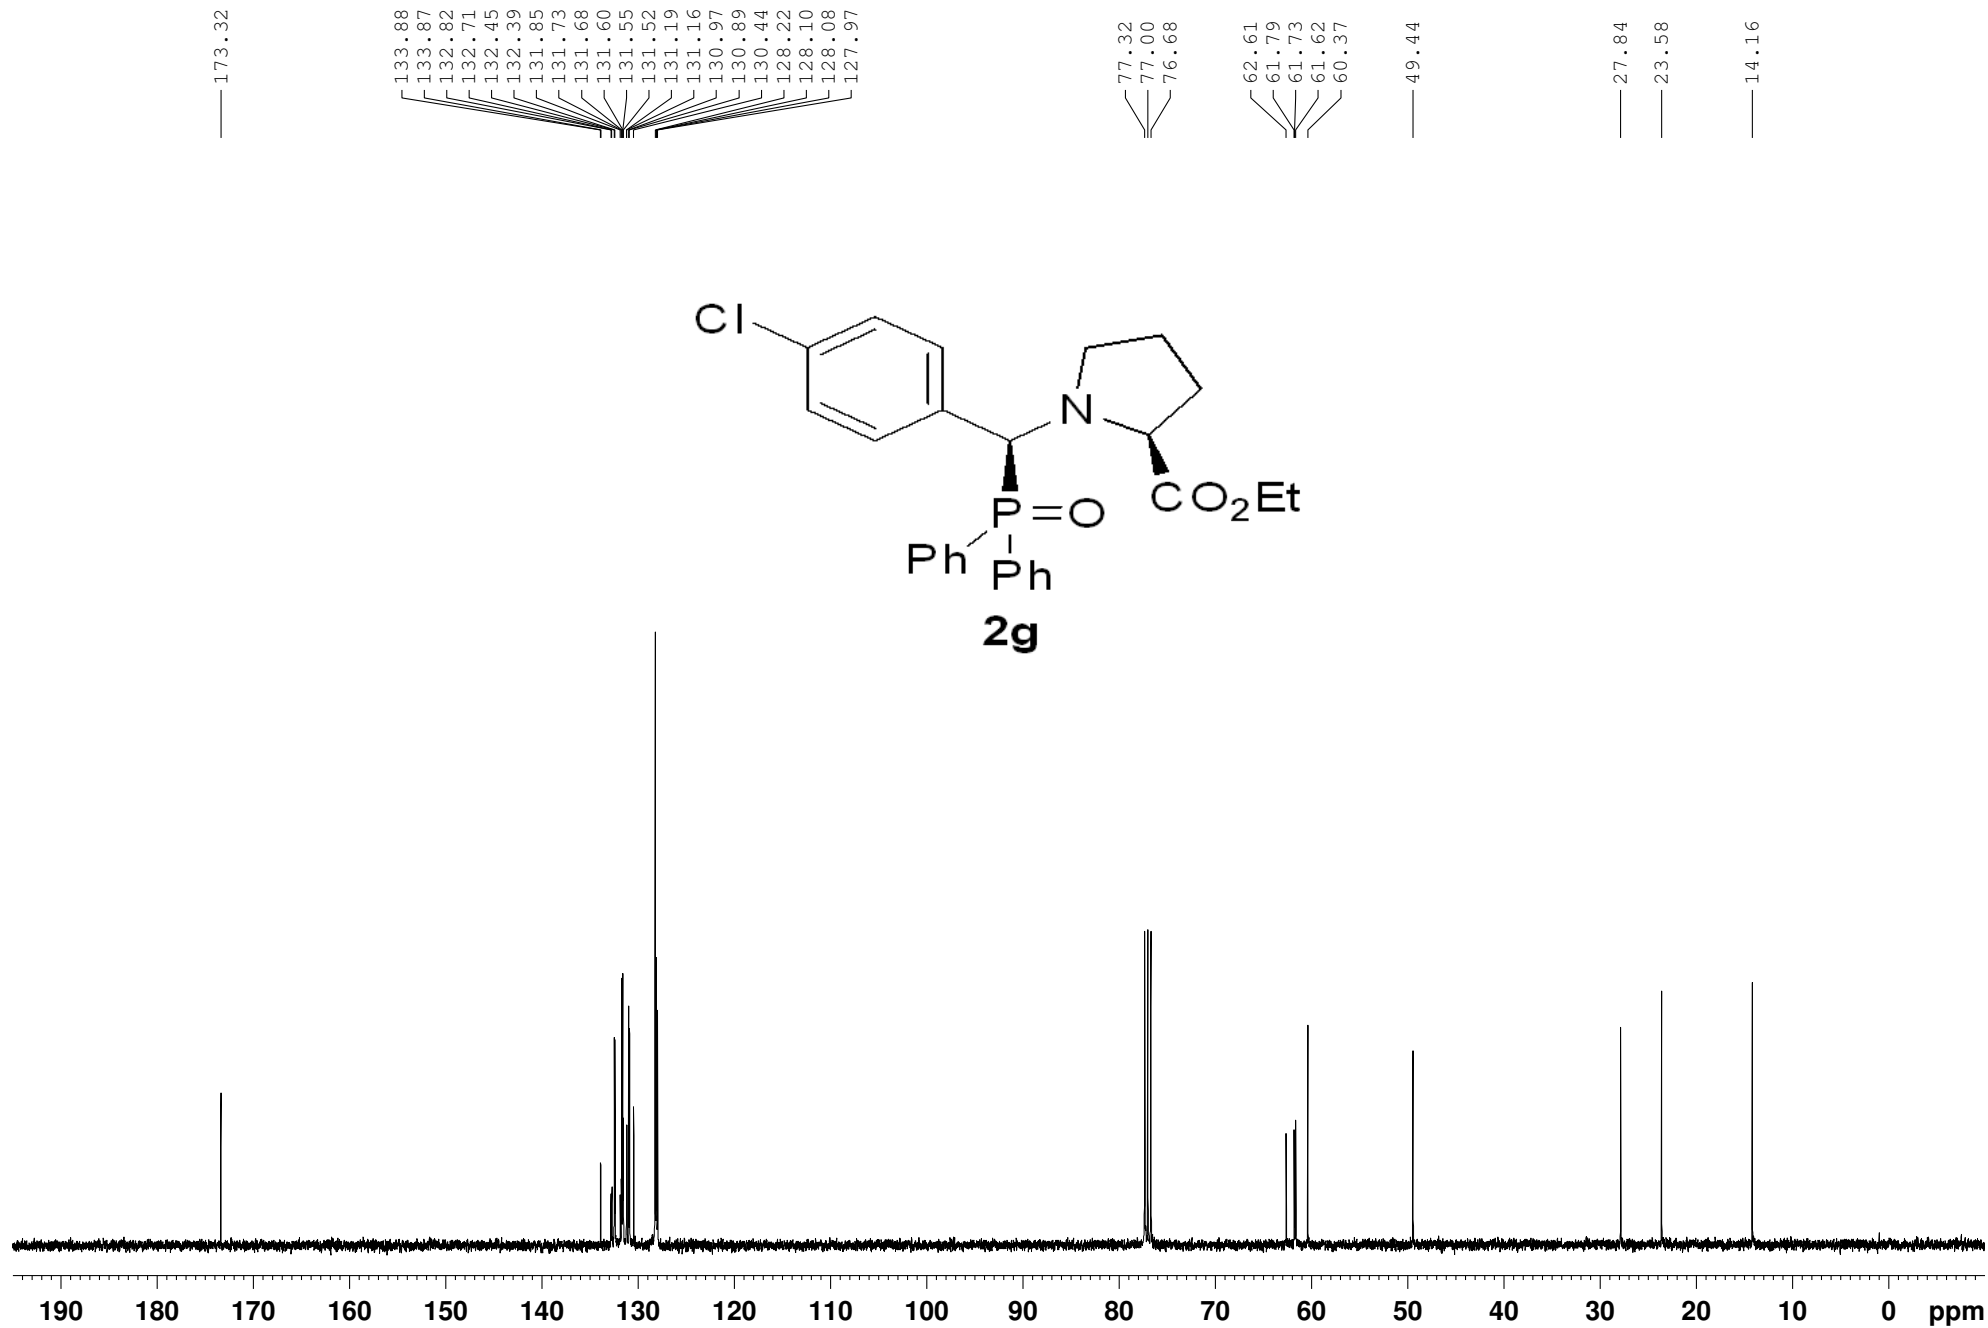

— 30.42

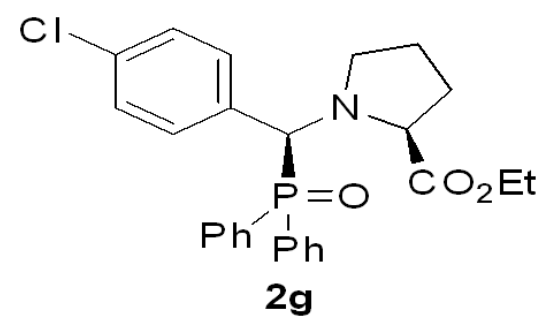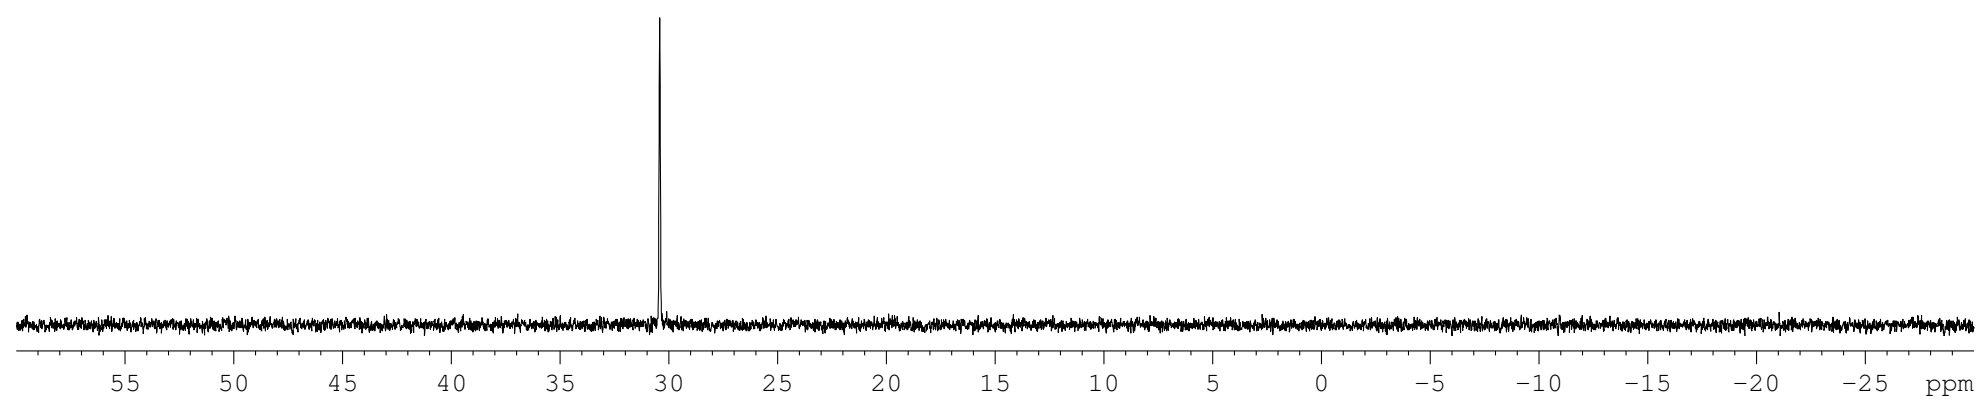

8.1199  
7.539  
7.536  
7.516  
7.512  
7.494  
7.491  
7.484  
7.466  
7.463  
7.344  
7.324  
7.308  
7.296  
7.290  
7.286  
7.279  
7.271  
7.268  
7.217  
7.210  
7.198  
7.191  
7.180  
7.173  
7.056  
7.037  
7.018  
5.690  
5.664  
4.107  
4.099  
4.091  
4.081  
4.074  
4.063  
4.056  
4.045  
4.038  
4.029  
3.589  
3.580  
3.573  
3.565  
3.559  
3.551  
3.542  
3.291  
3.278  
3.268  
3.255  
3.063  
3.043  
3.023  
3.004  
1.884  
1.875  
1.862  
1.853  
1.840  
1.831  
1.810  
1.802  
1.789  
1.781  
1.777  
1.769  
1.757  
1.738  
1.728  
1.710  
1.702  
1.681  
1.672  
1.663  
1.644  
1.635  
1.624  
1.614  
1.226  
1.208  
1.190

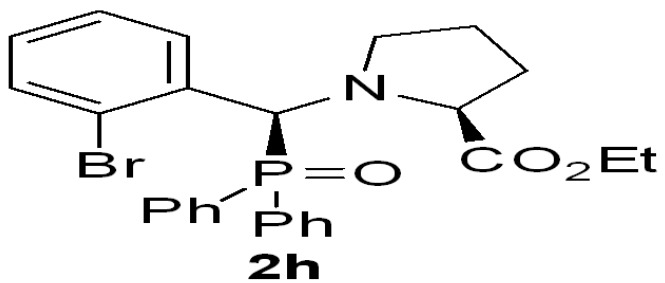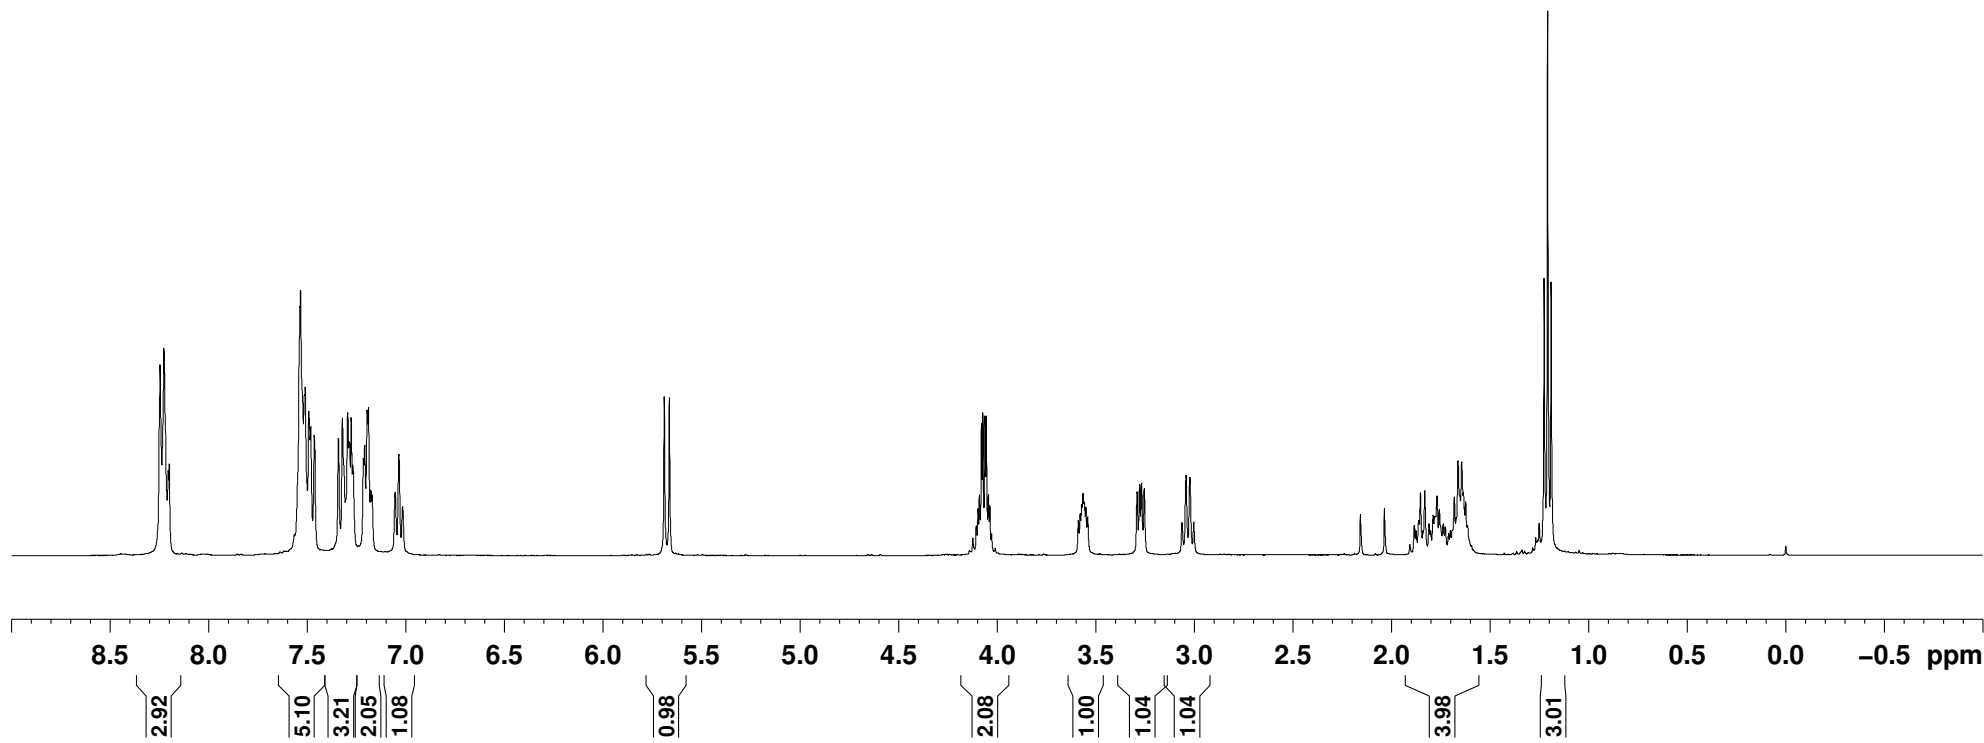

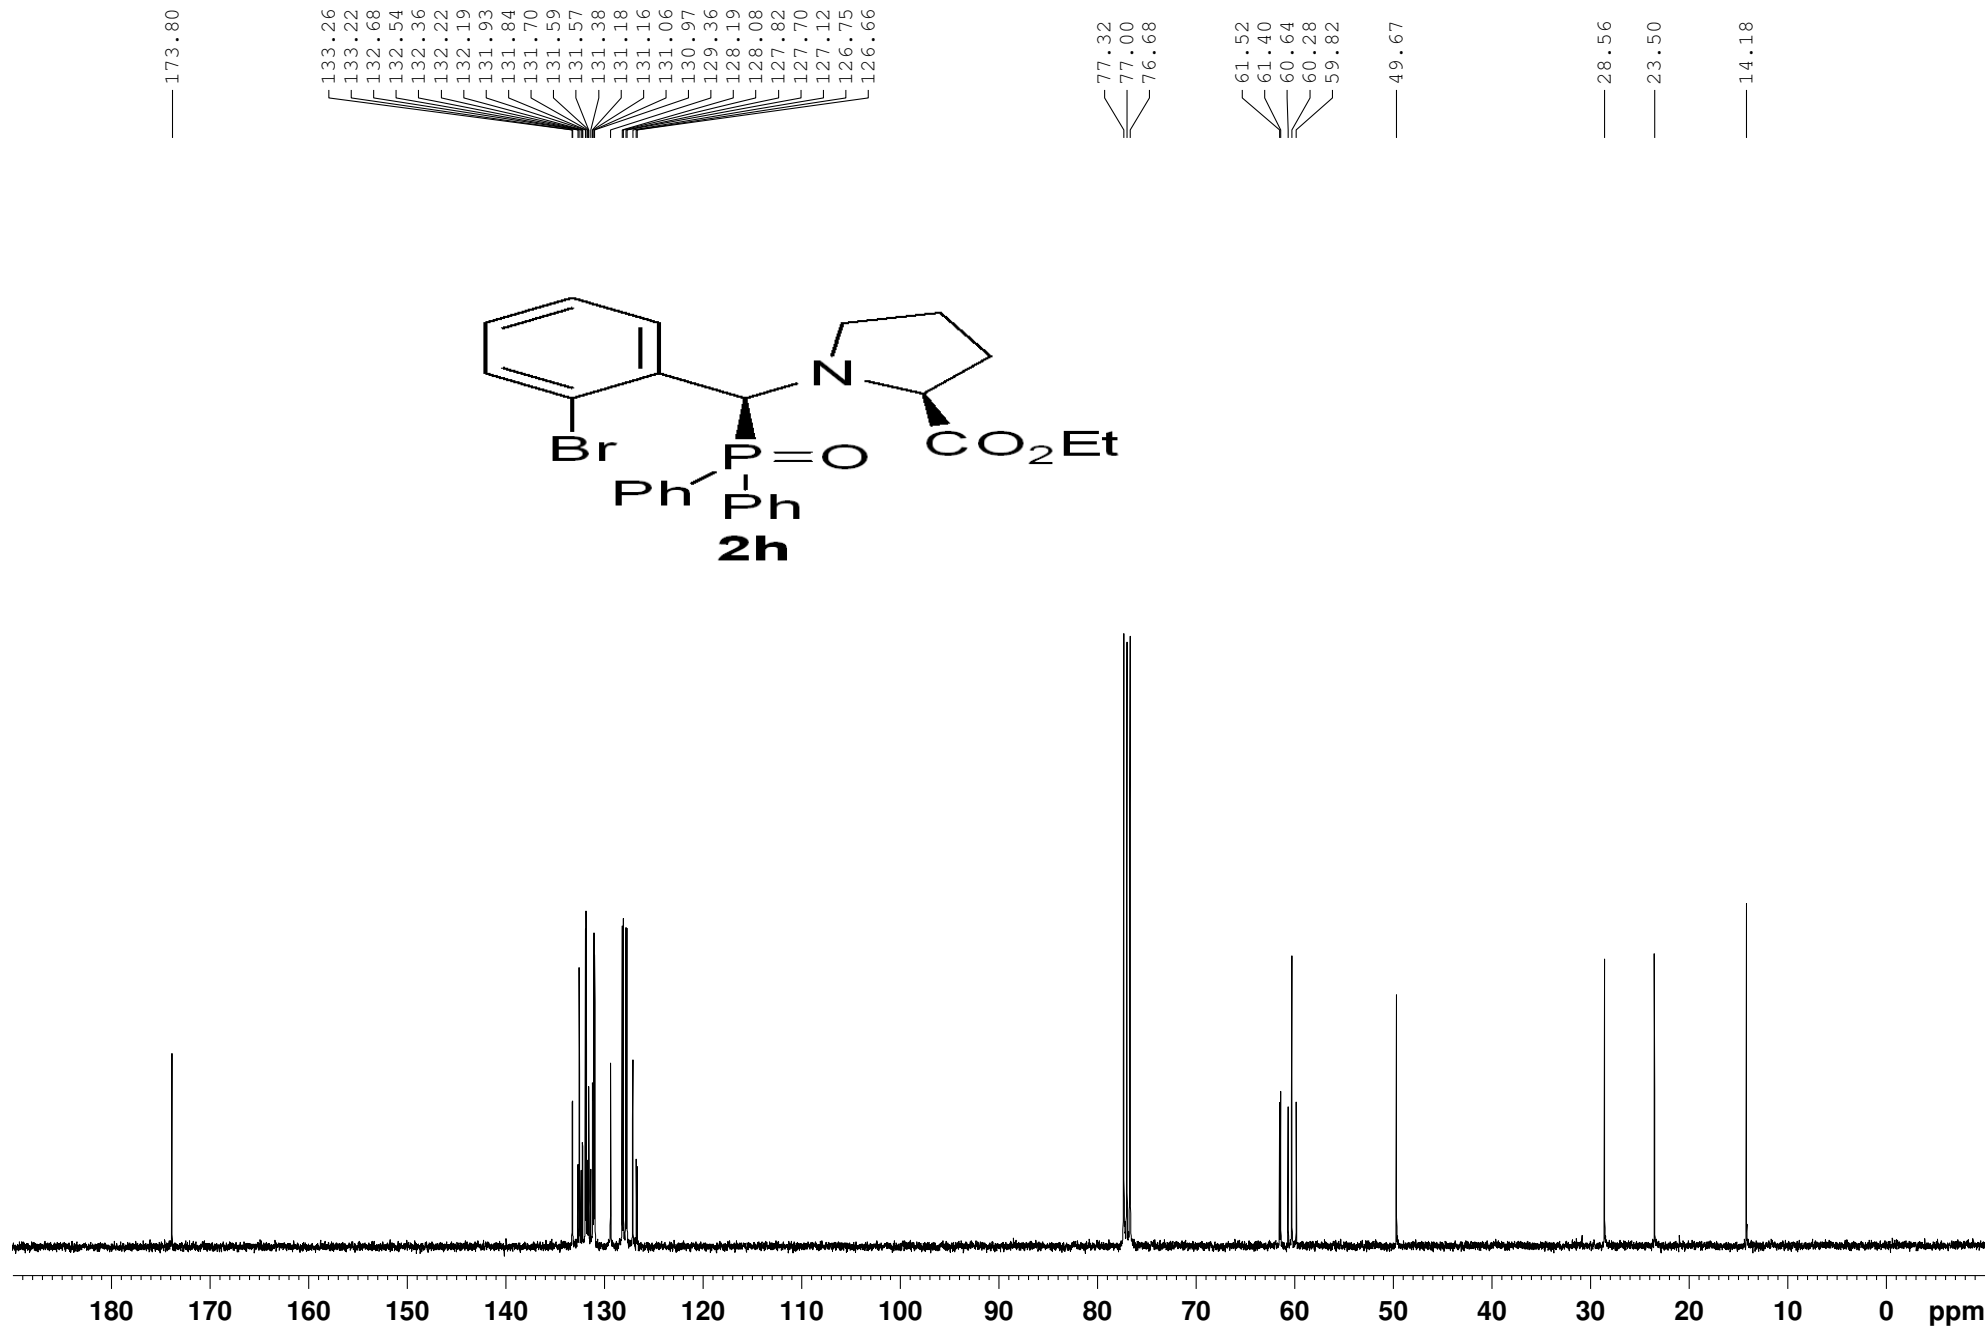

31.50

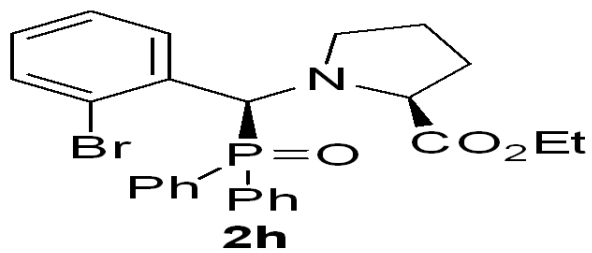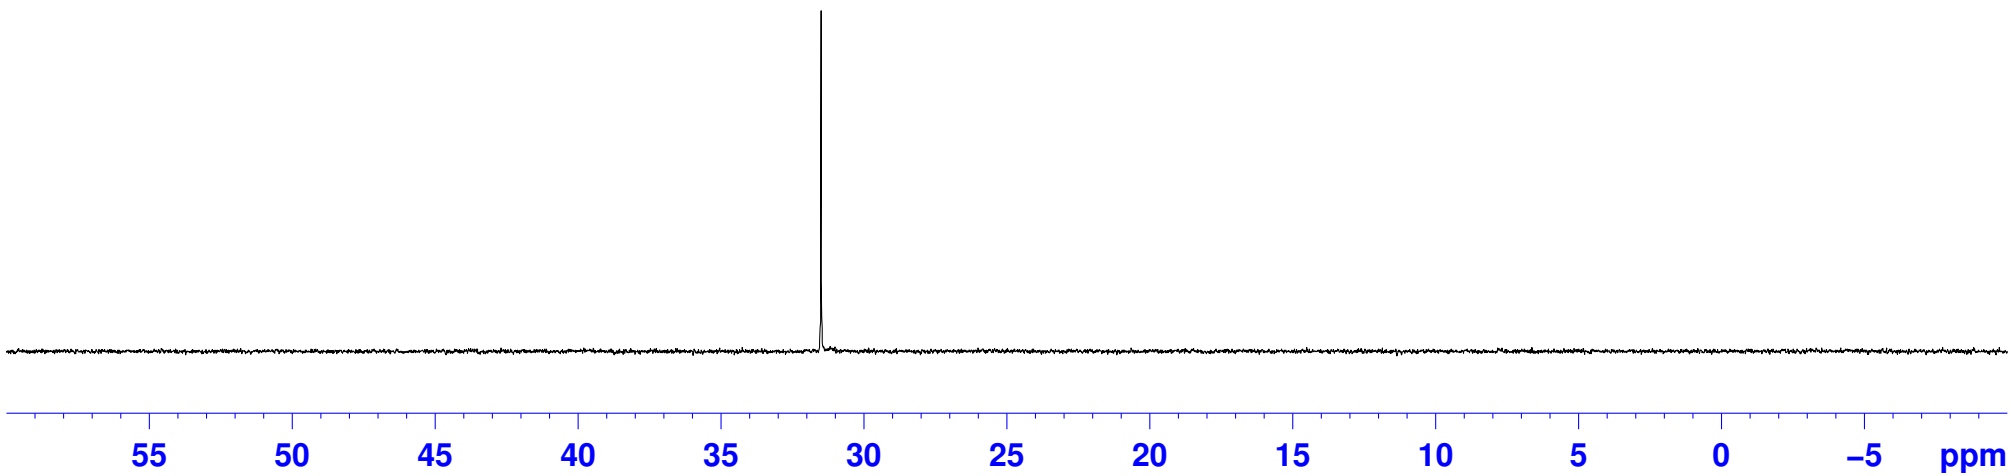

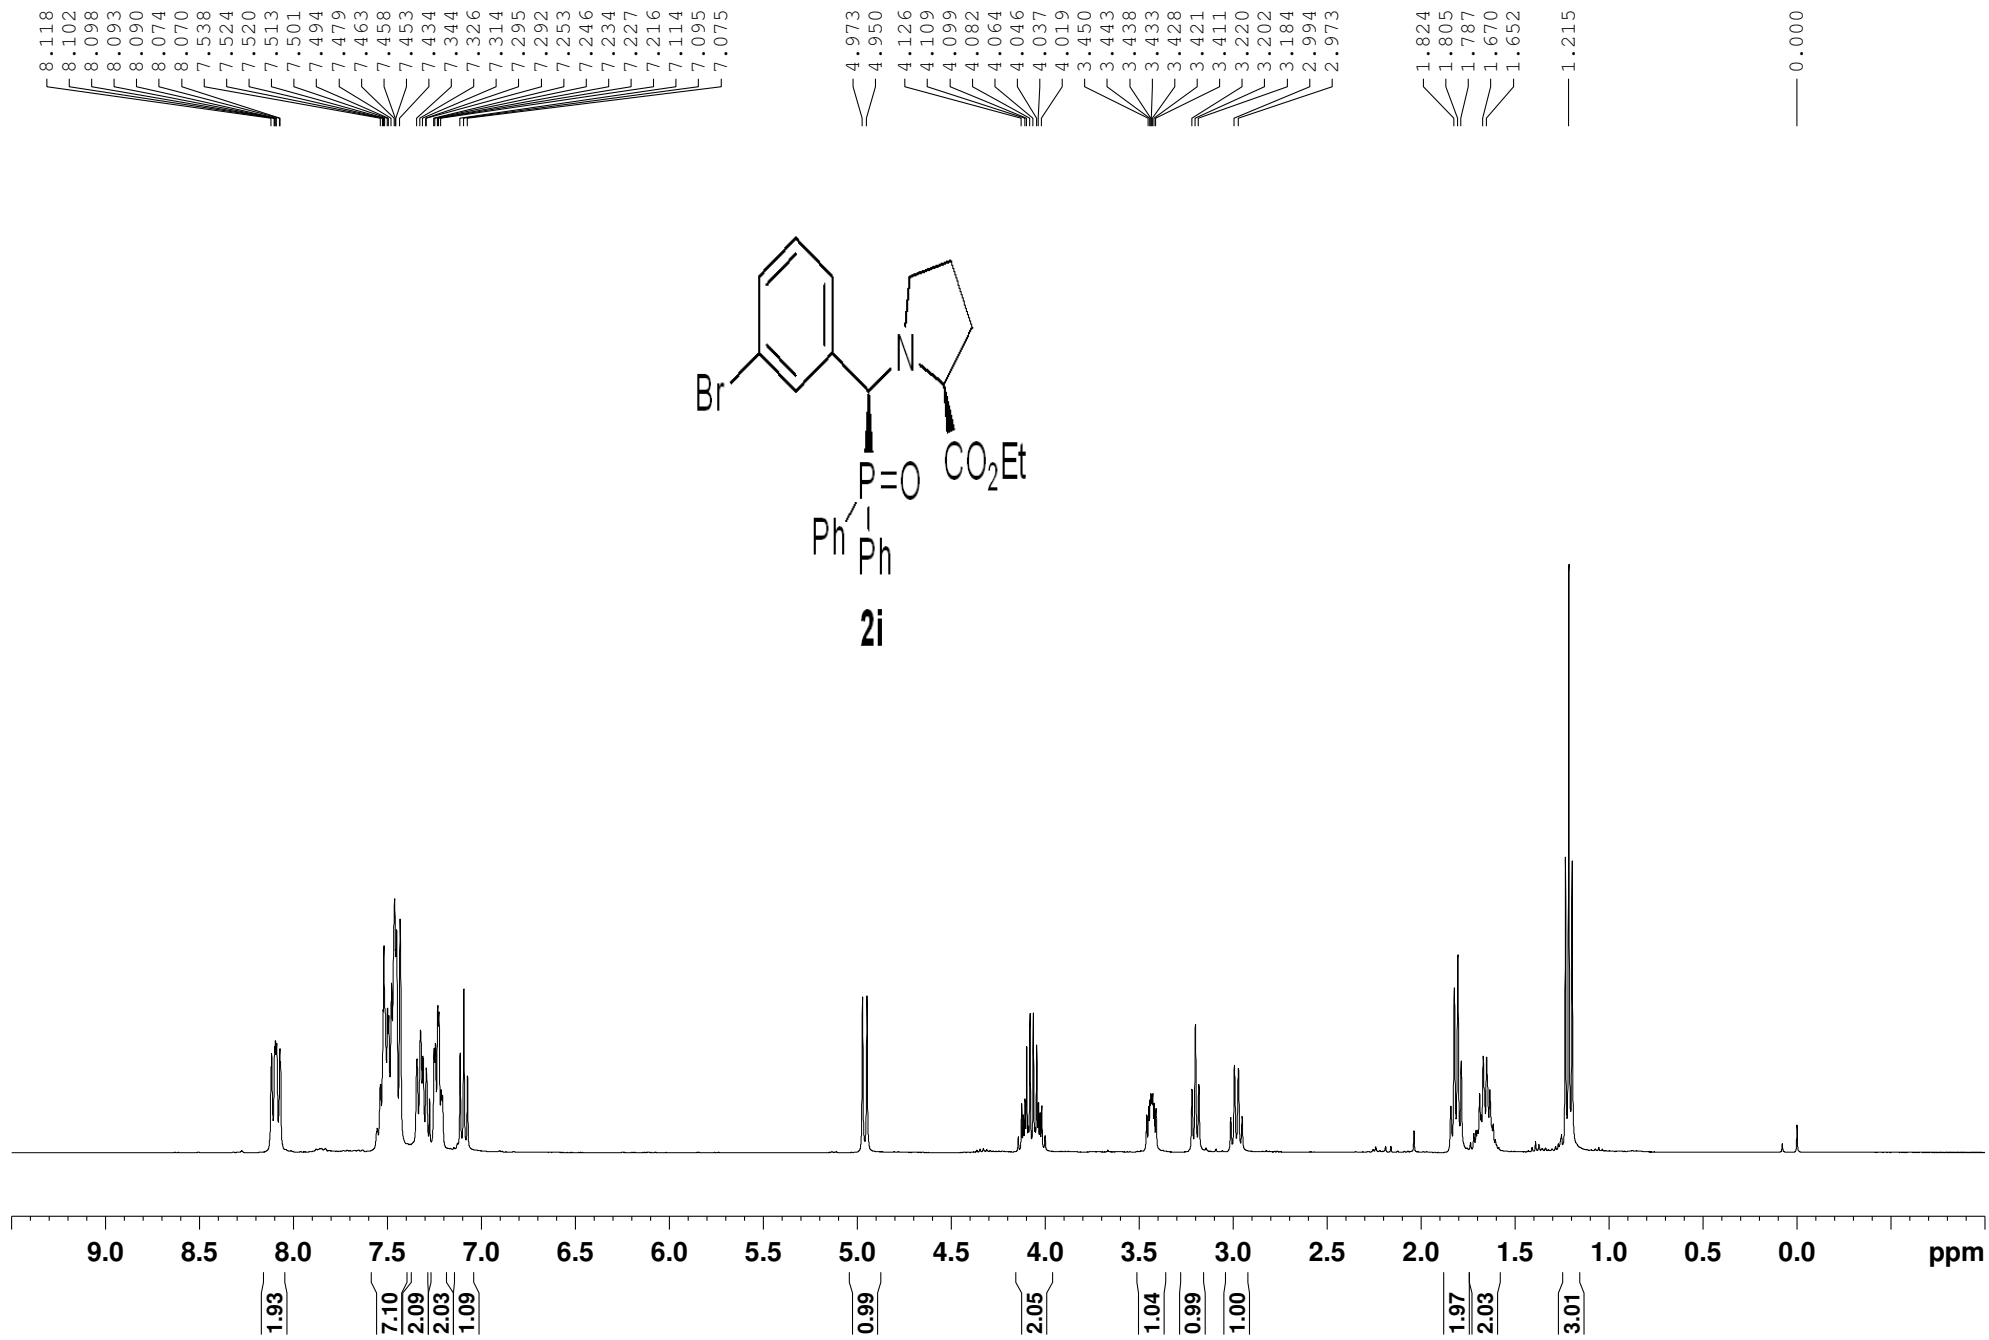

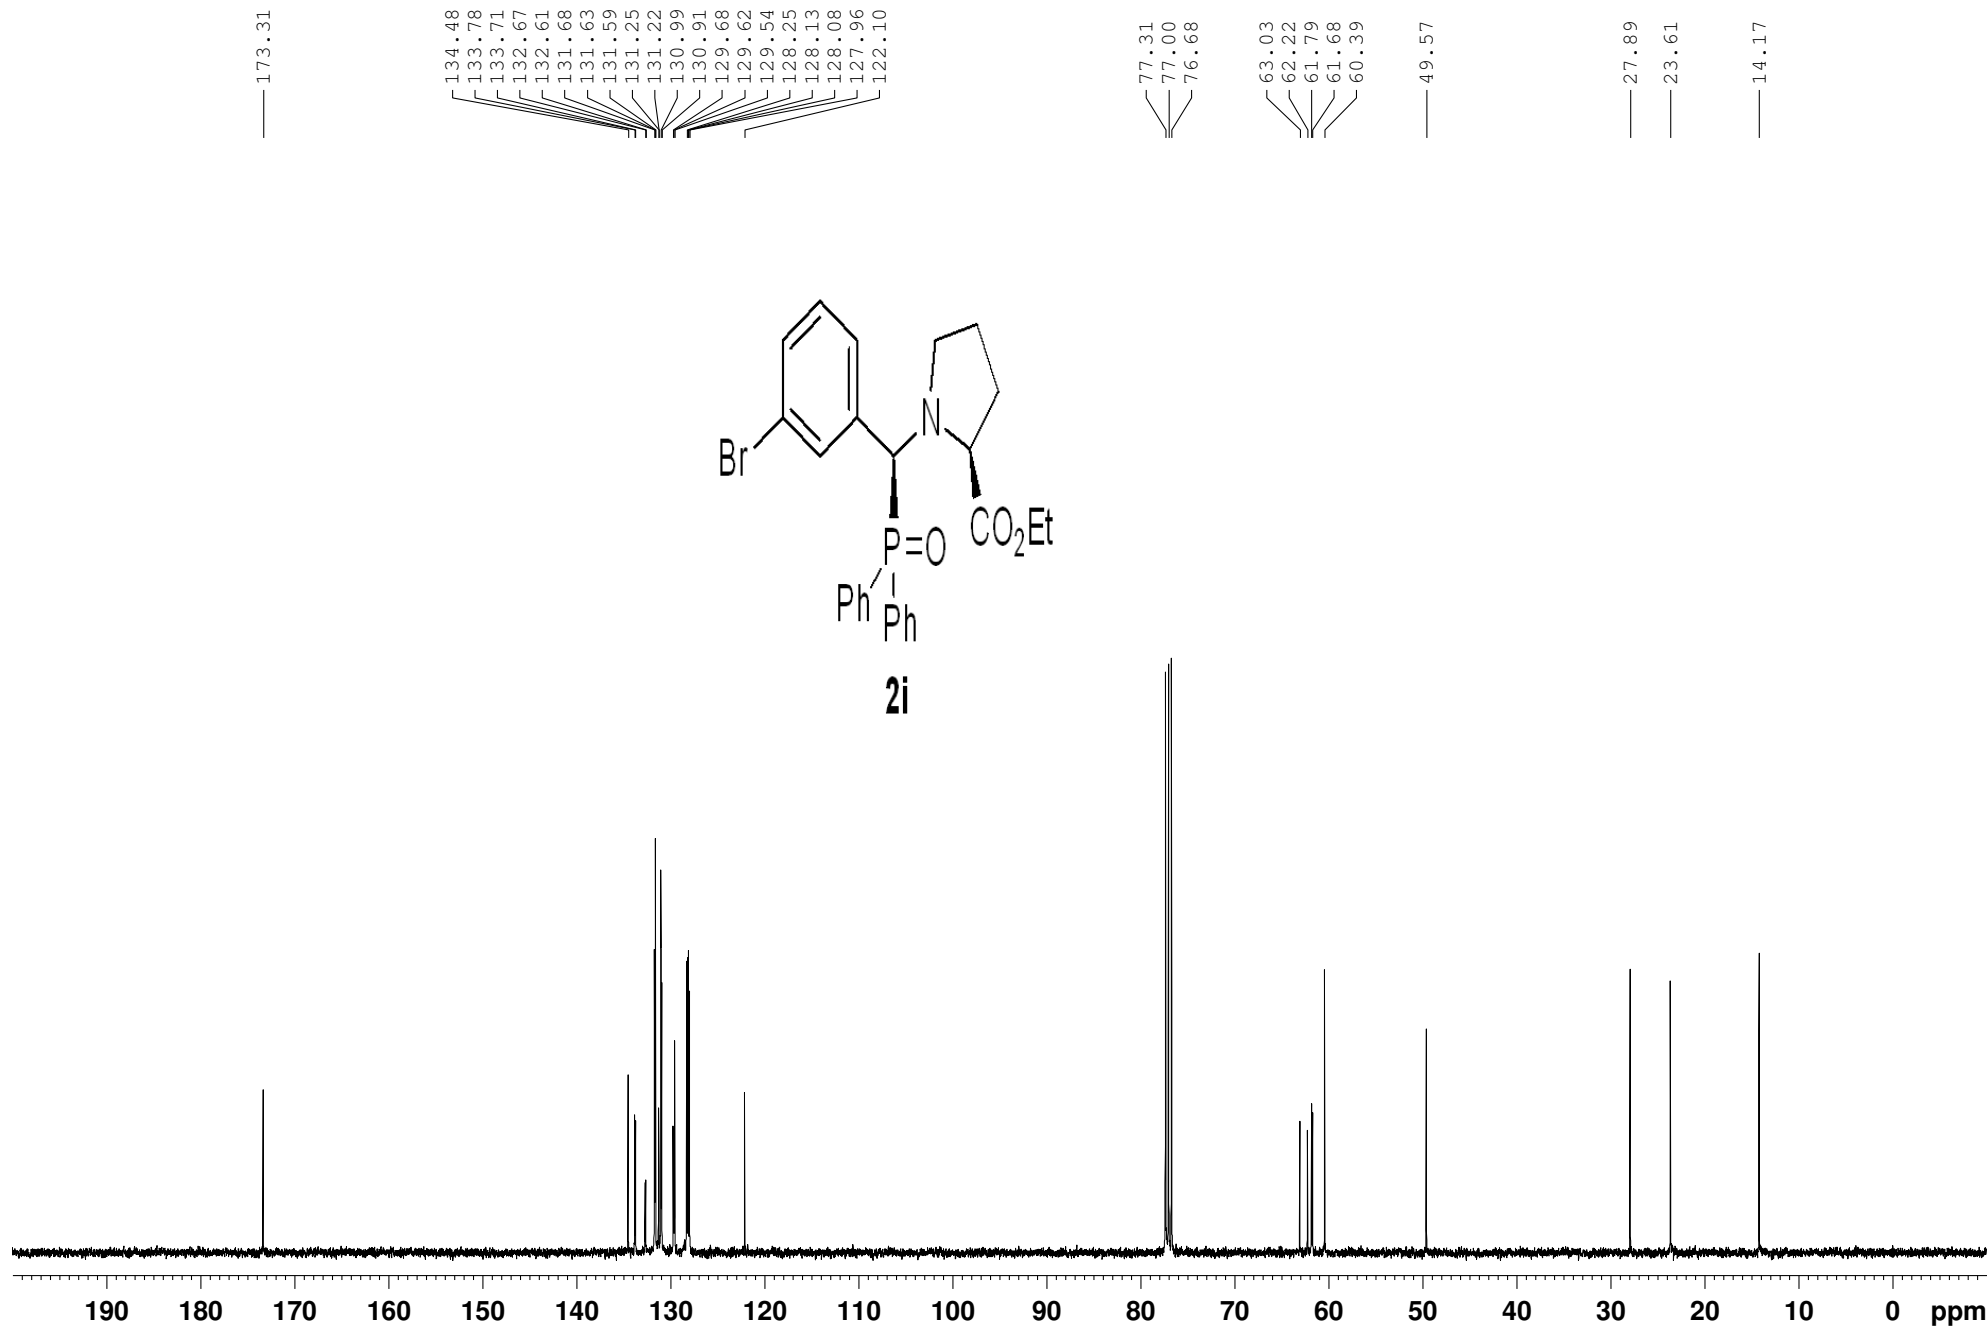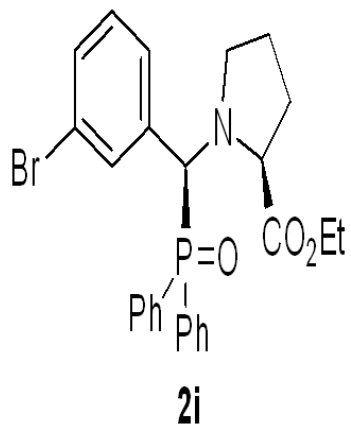

— 30.25

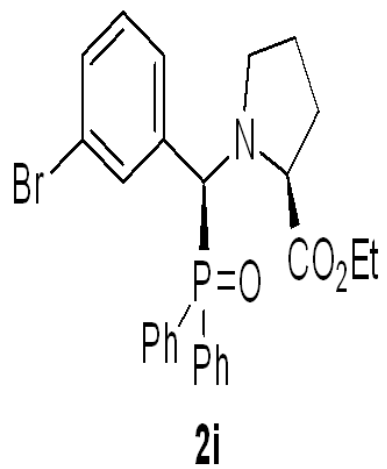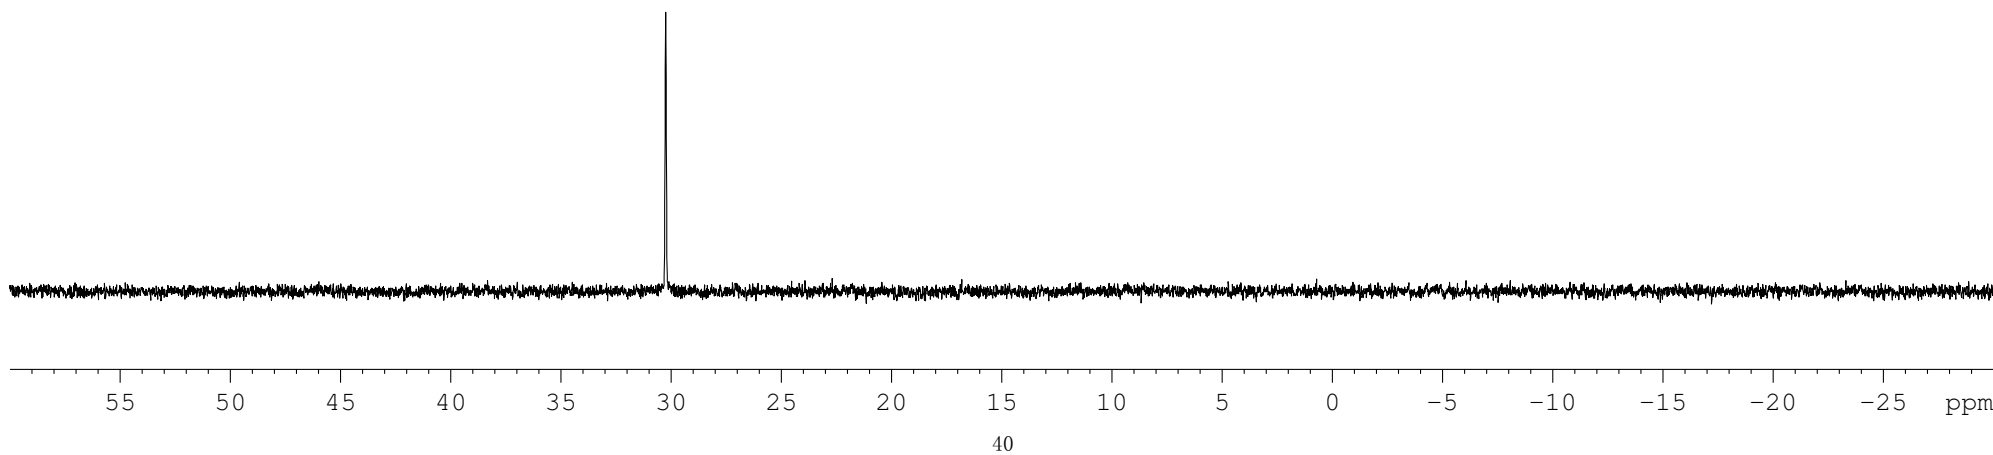



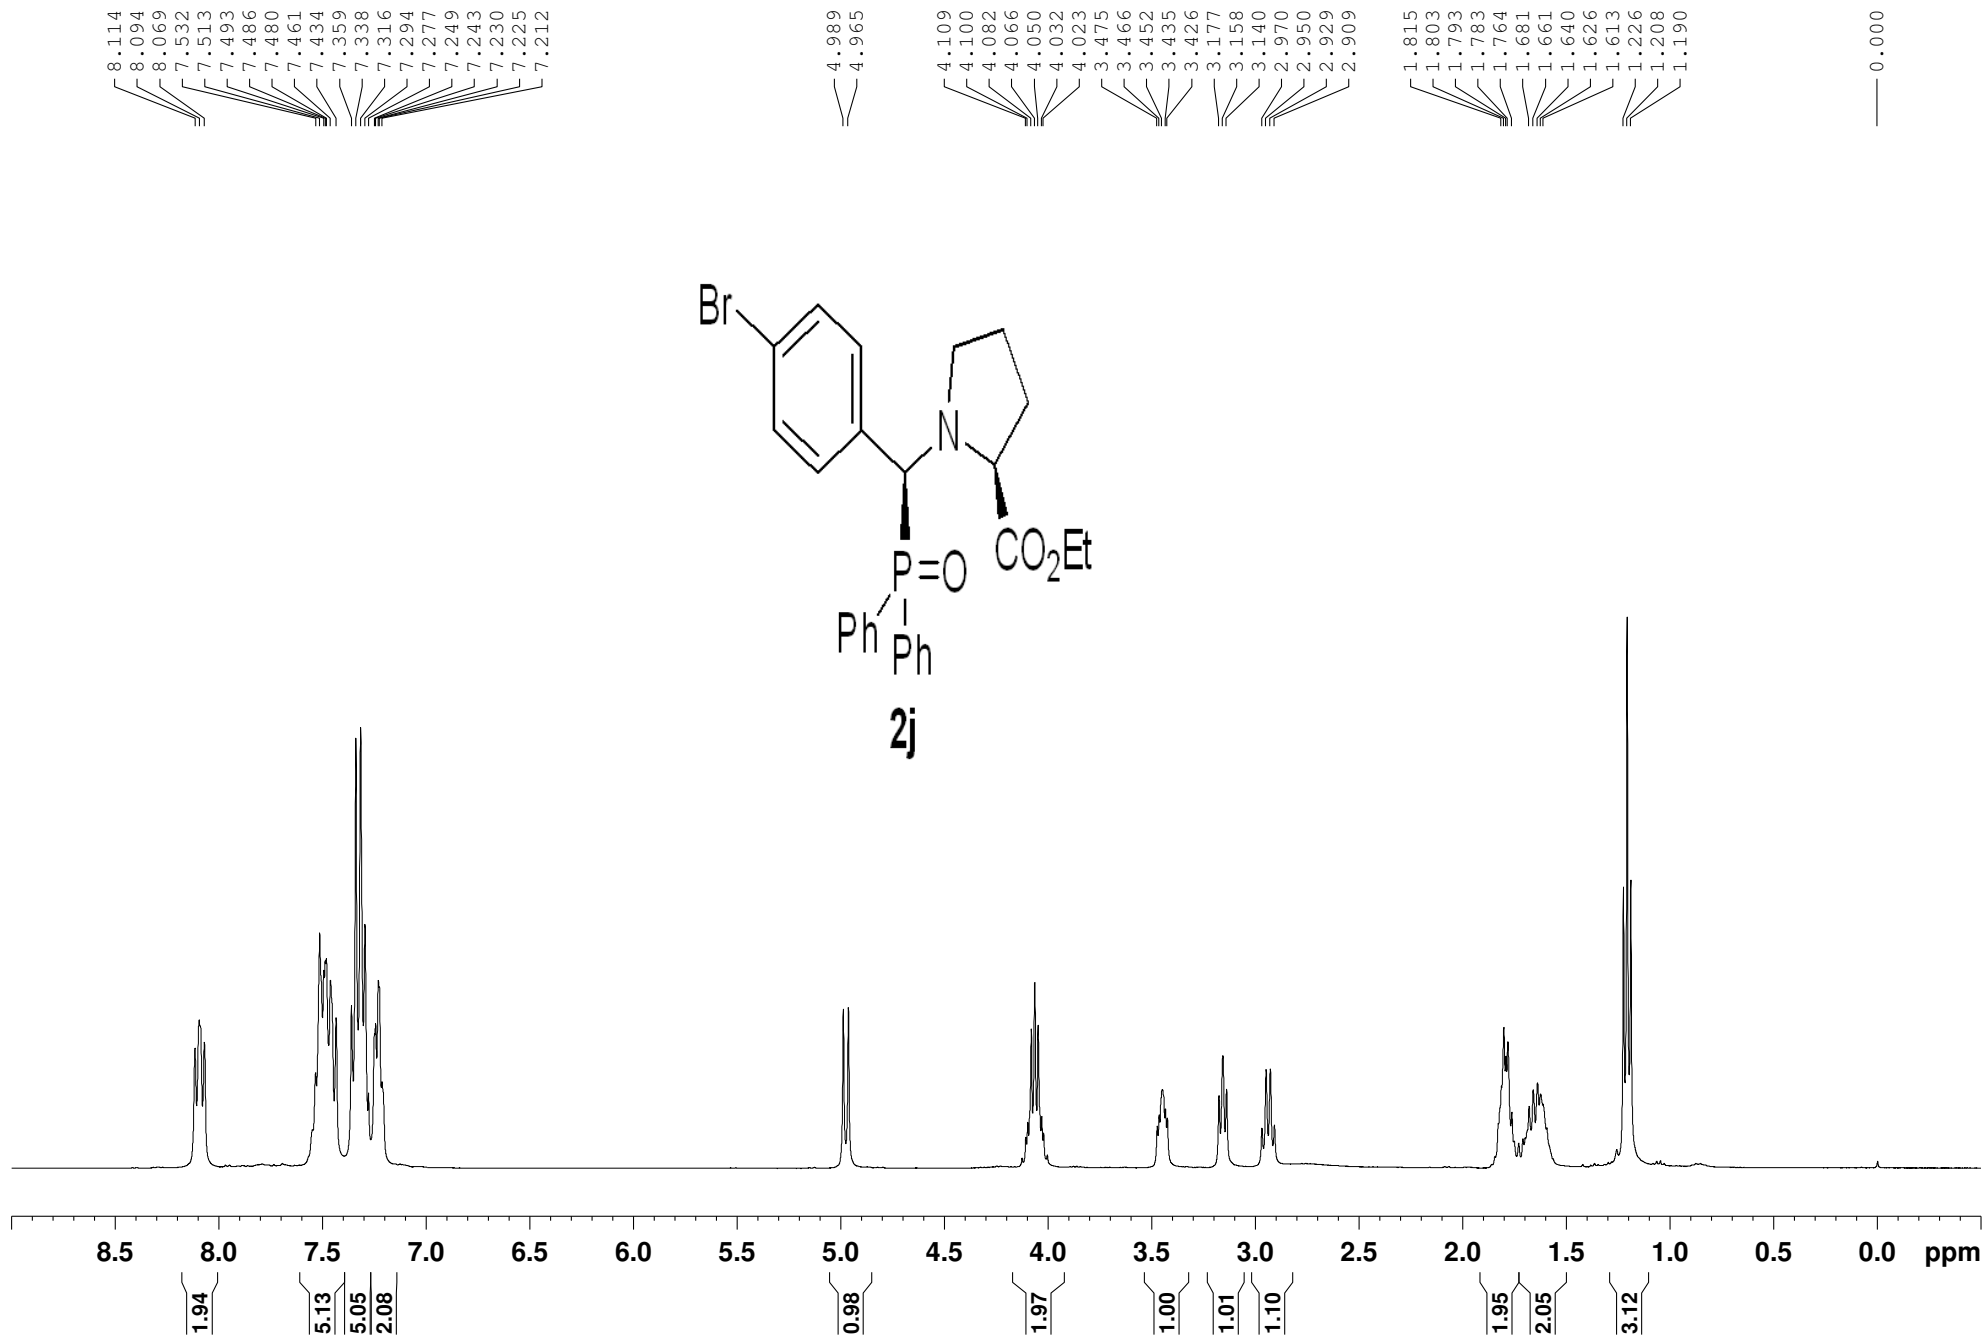

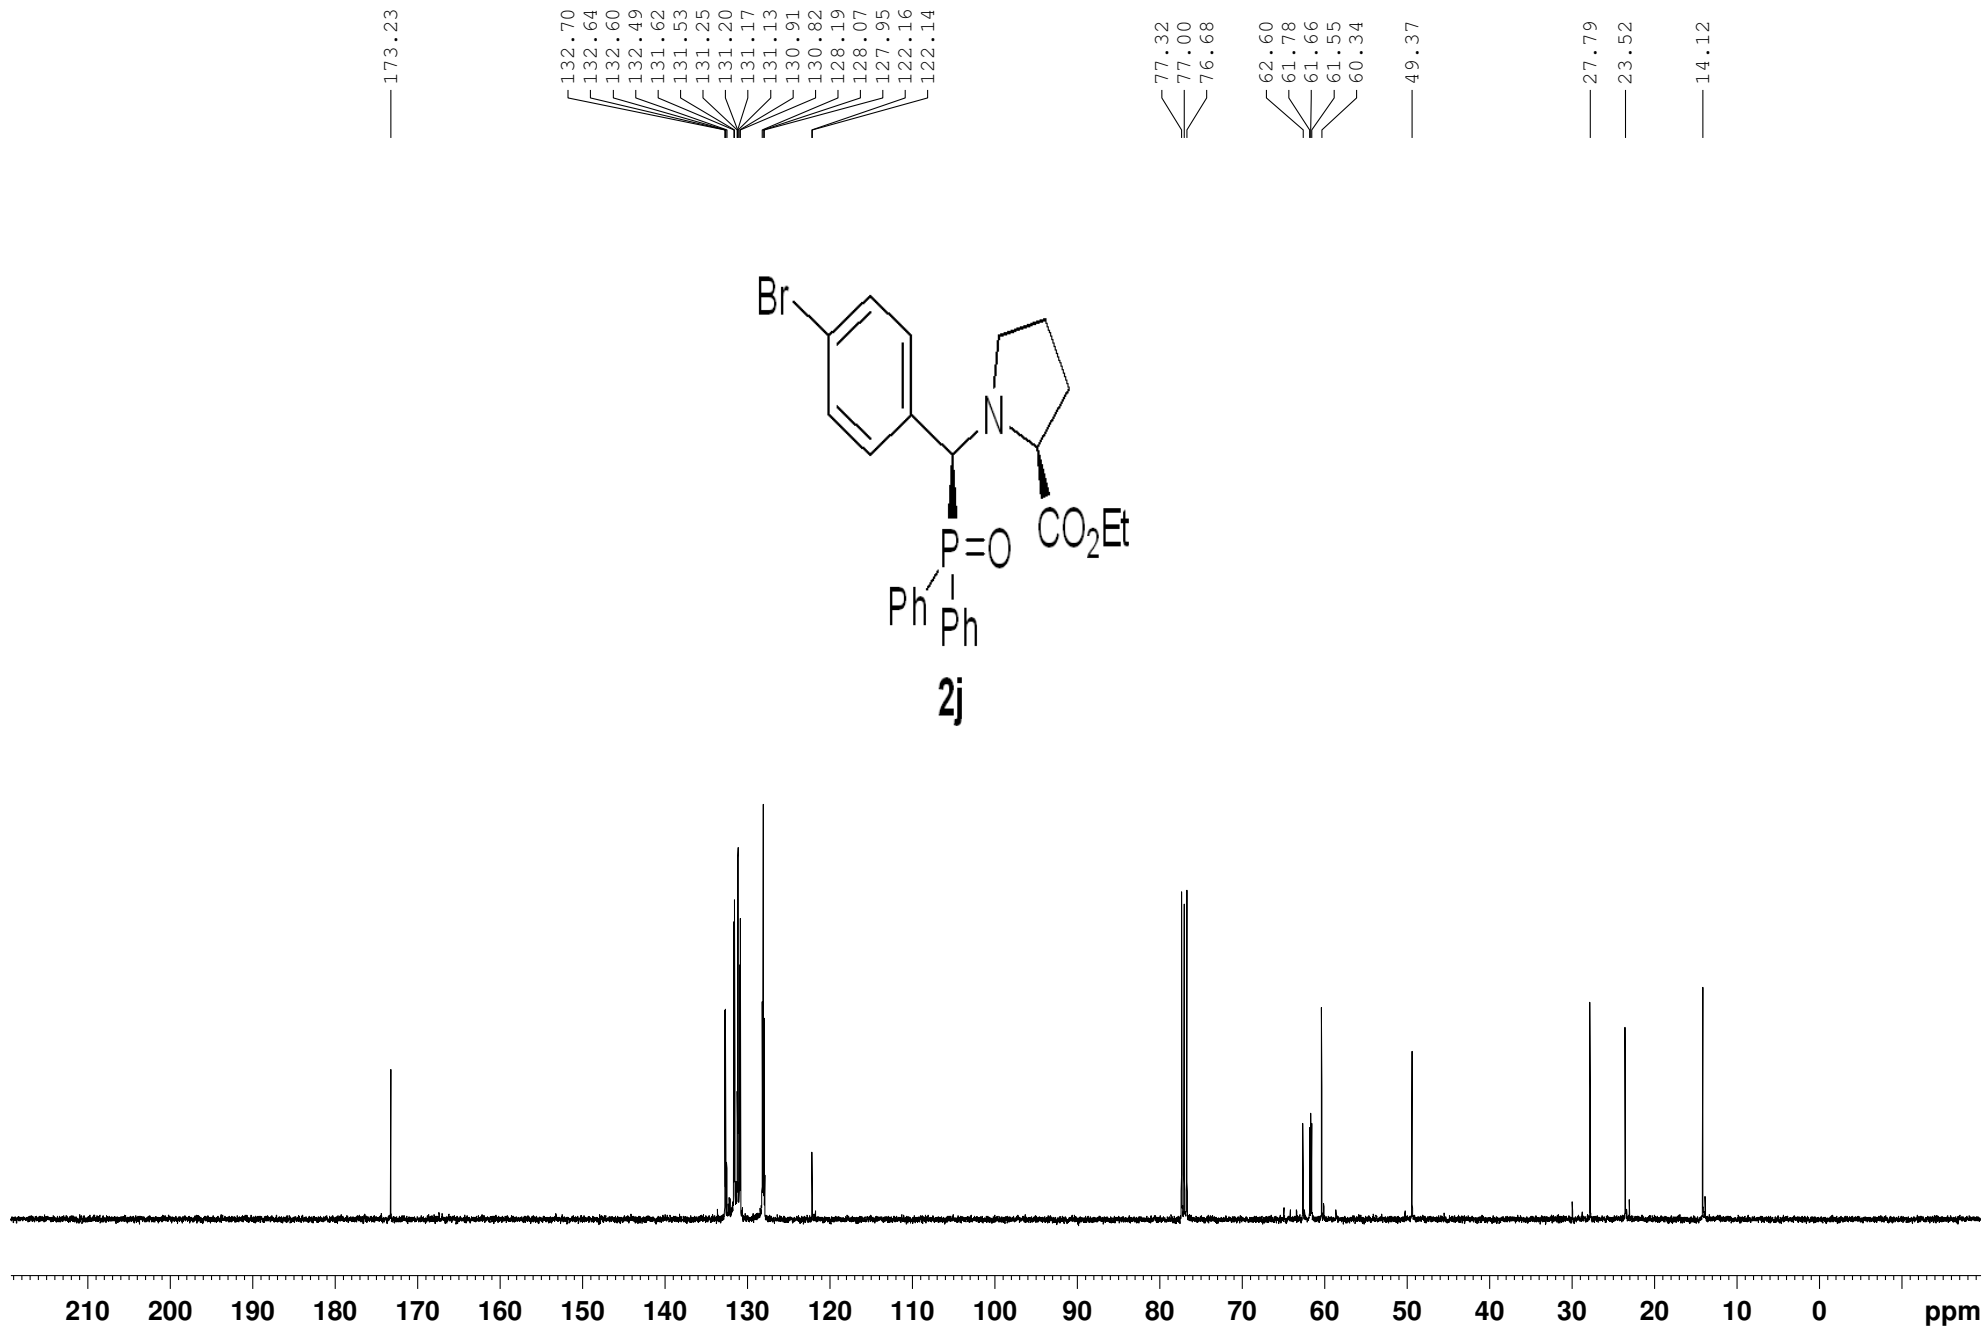

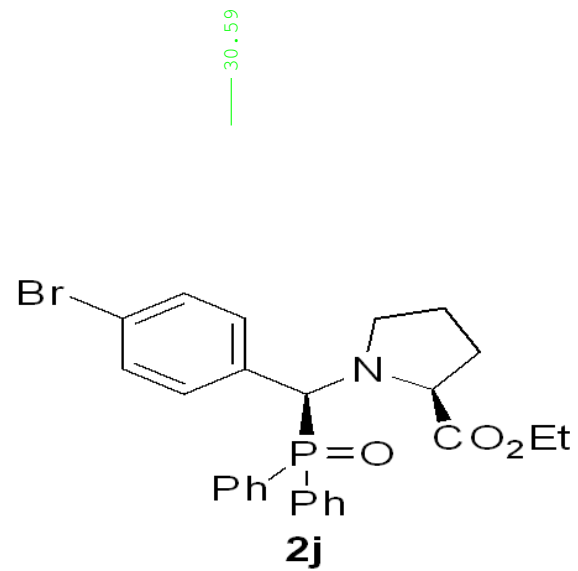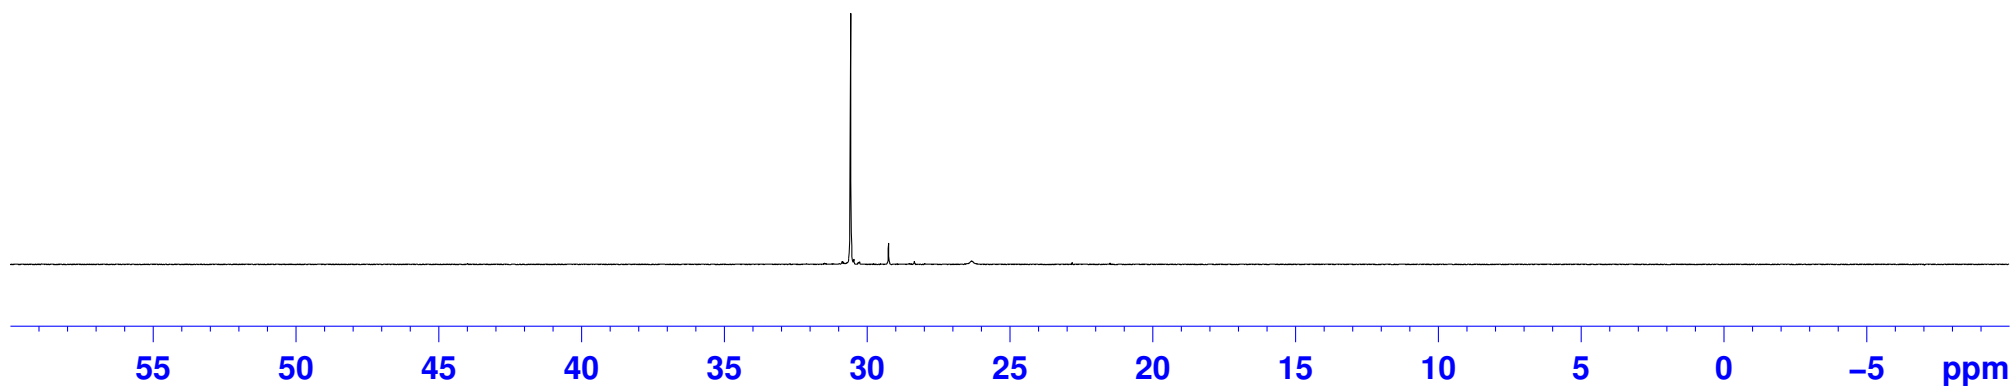

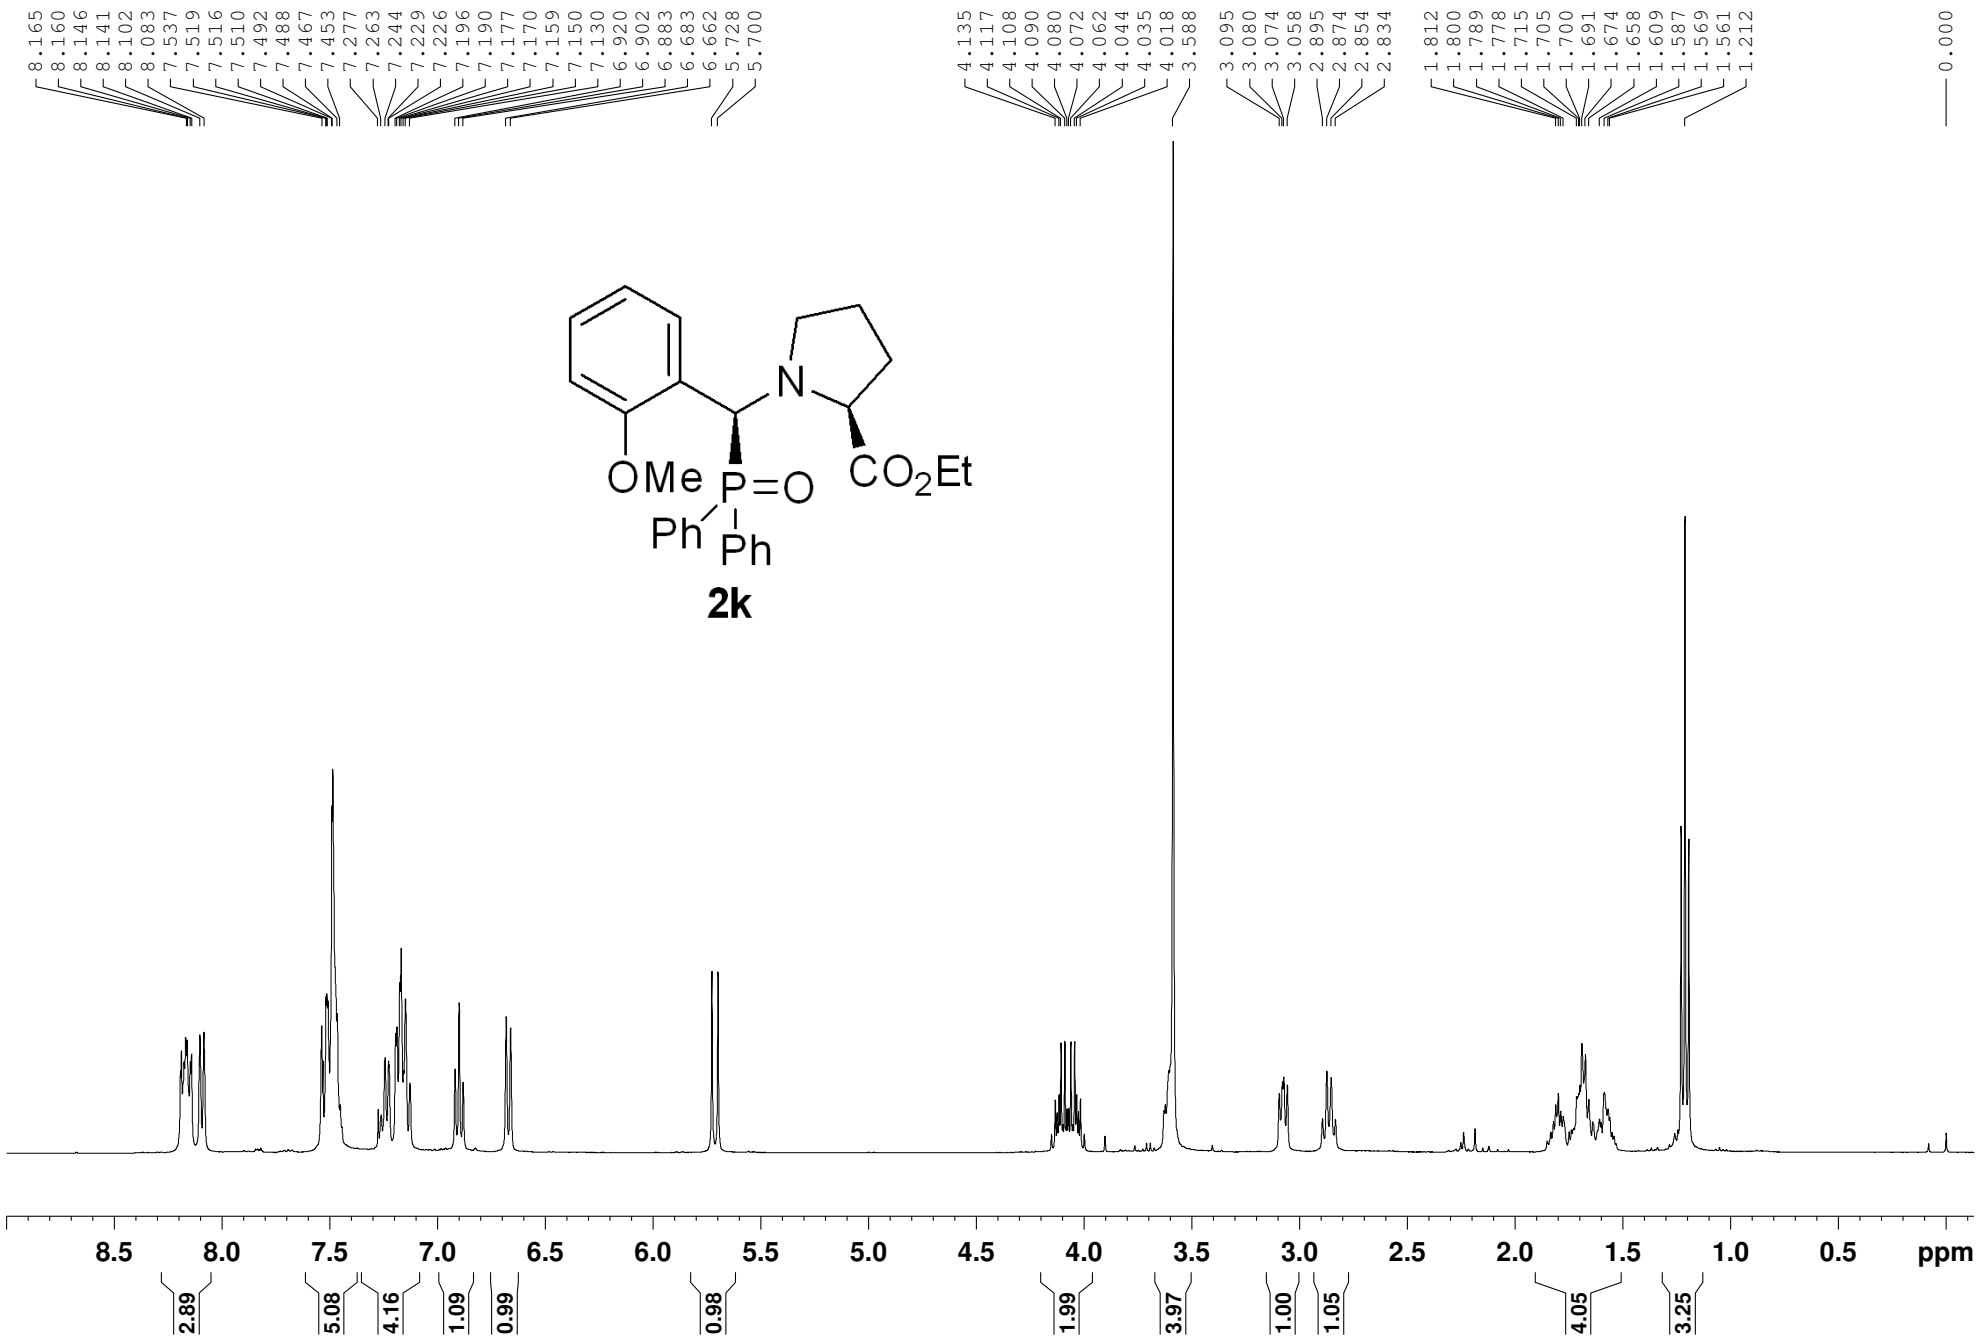

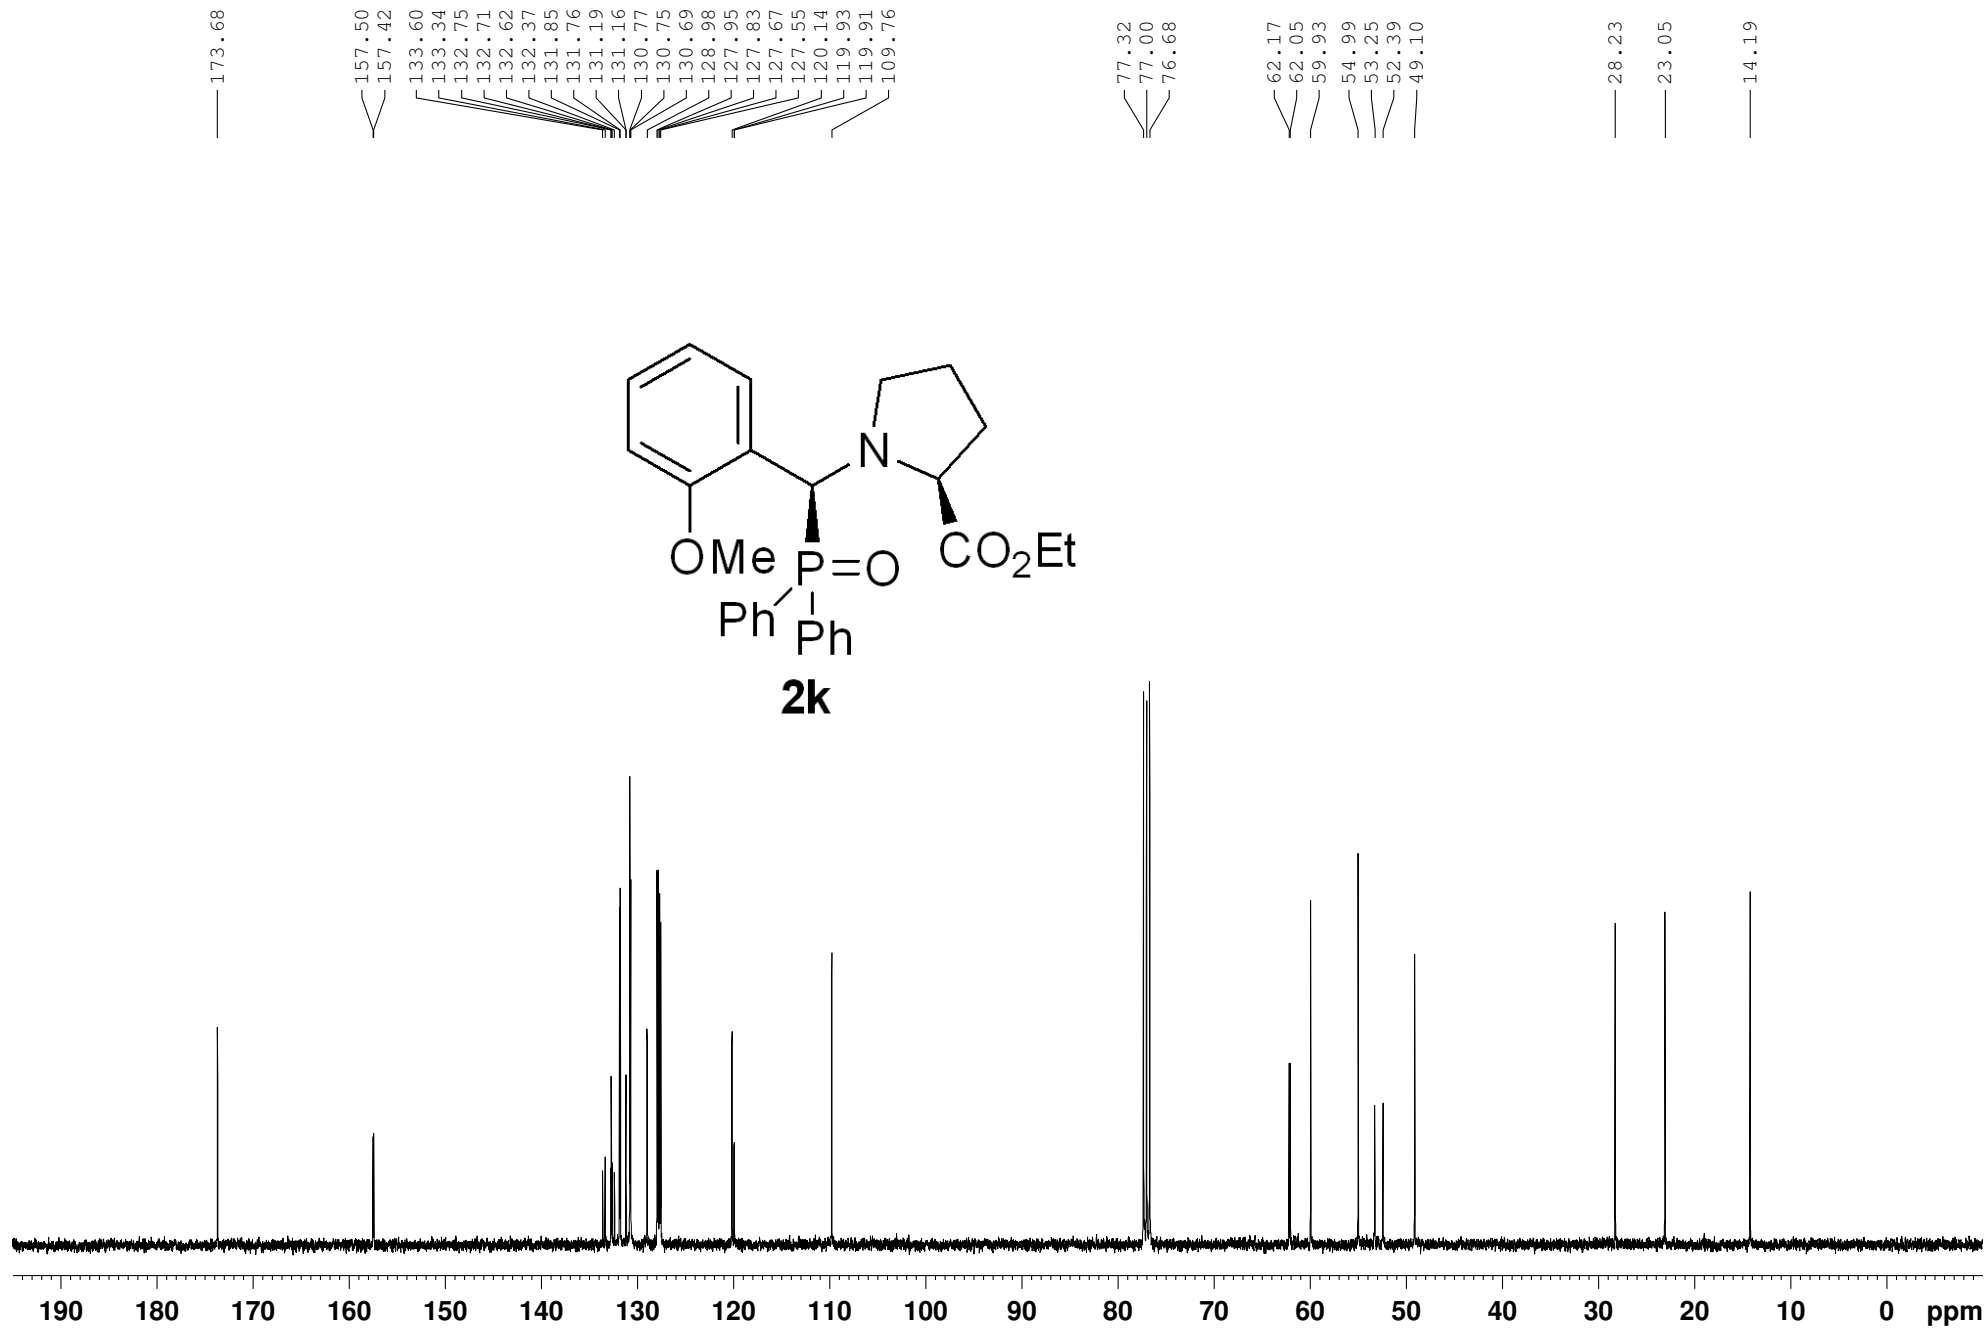

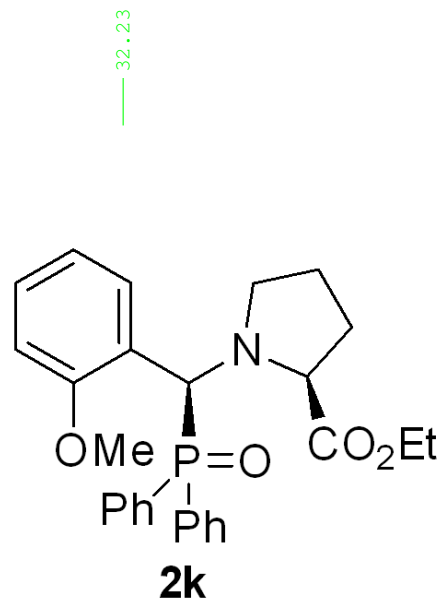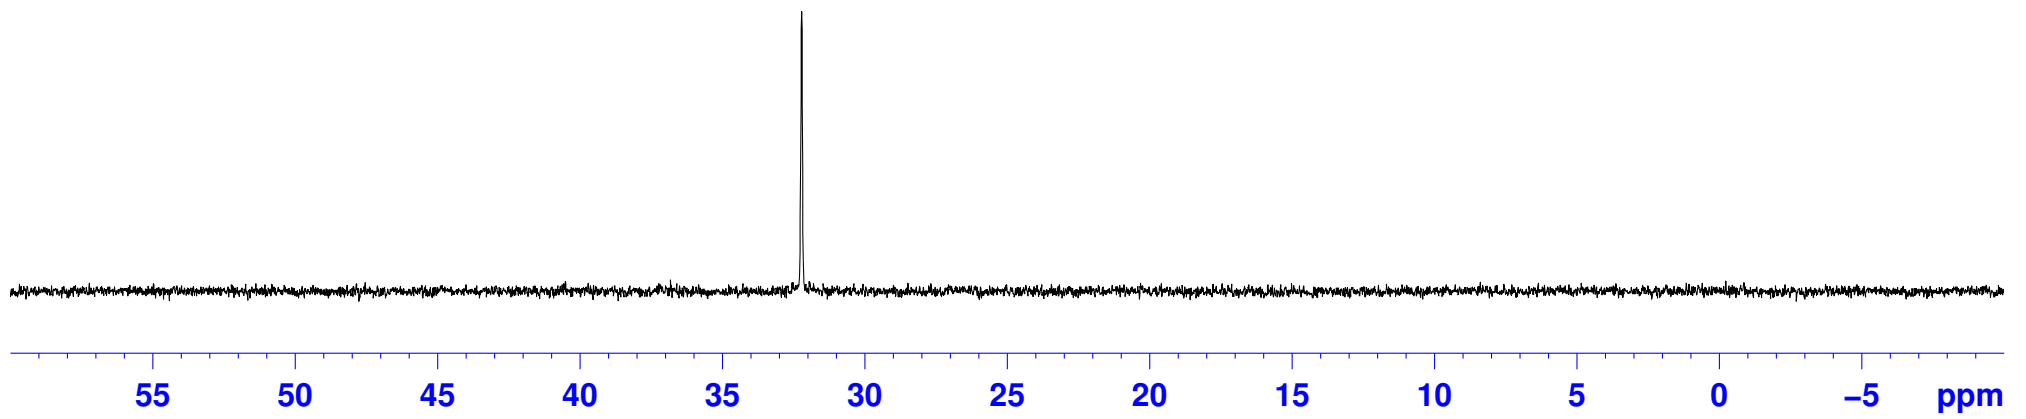

8.090  
8.086  
8.083  
8.066  
8.062  
7.513  
7.496  
7.491  
7.479  
7.471  
7.463  
7.460  
7.456  
7.436  
7.433  
7.372  
7.352  
7.280  
7.274  
7.265  
7.261  
7.227  
7.221  
7.208  
7.205  
7.202  
6.761  
6.739

4.955  
4.929

4.082  
4.064  
4.045  
3.737  
3.491  
3.482  
3.474  
3.468  
3.460  
3.451  
3.443  
3.222  
3.203  
3.186  
2.993  
2.973  
2.953  
2.933  
1.818  
1.804  
1.796  
1.784  
1.766  
1.745  
1.688  
1.679  
1.658  
1.638  
1.619  
1.612  
1.602  
1.594  
1.581  
1.209

0.000

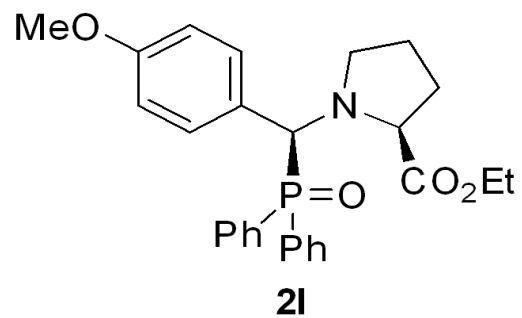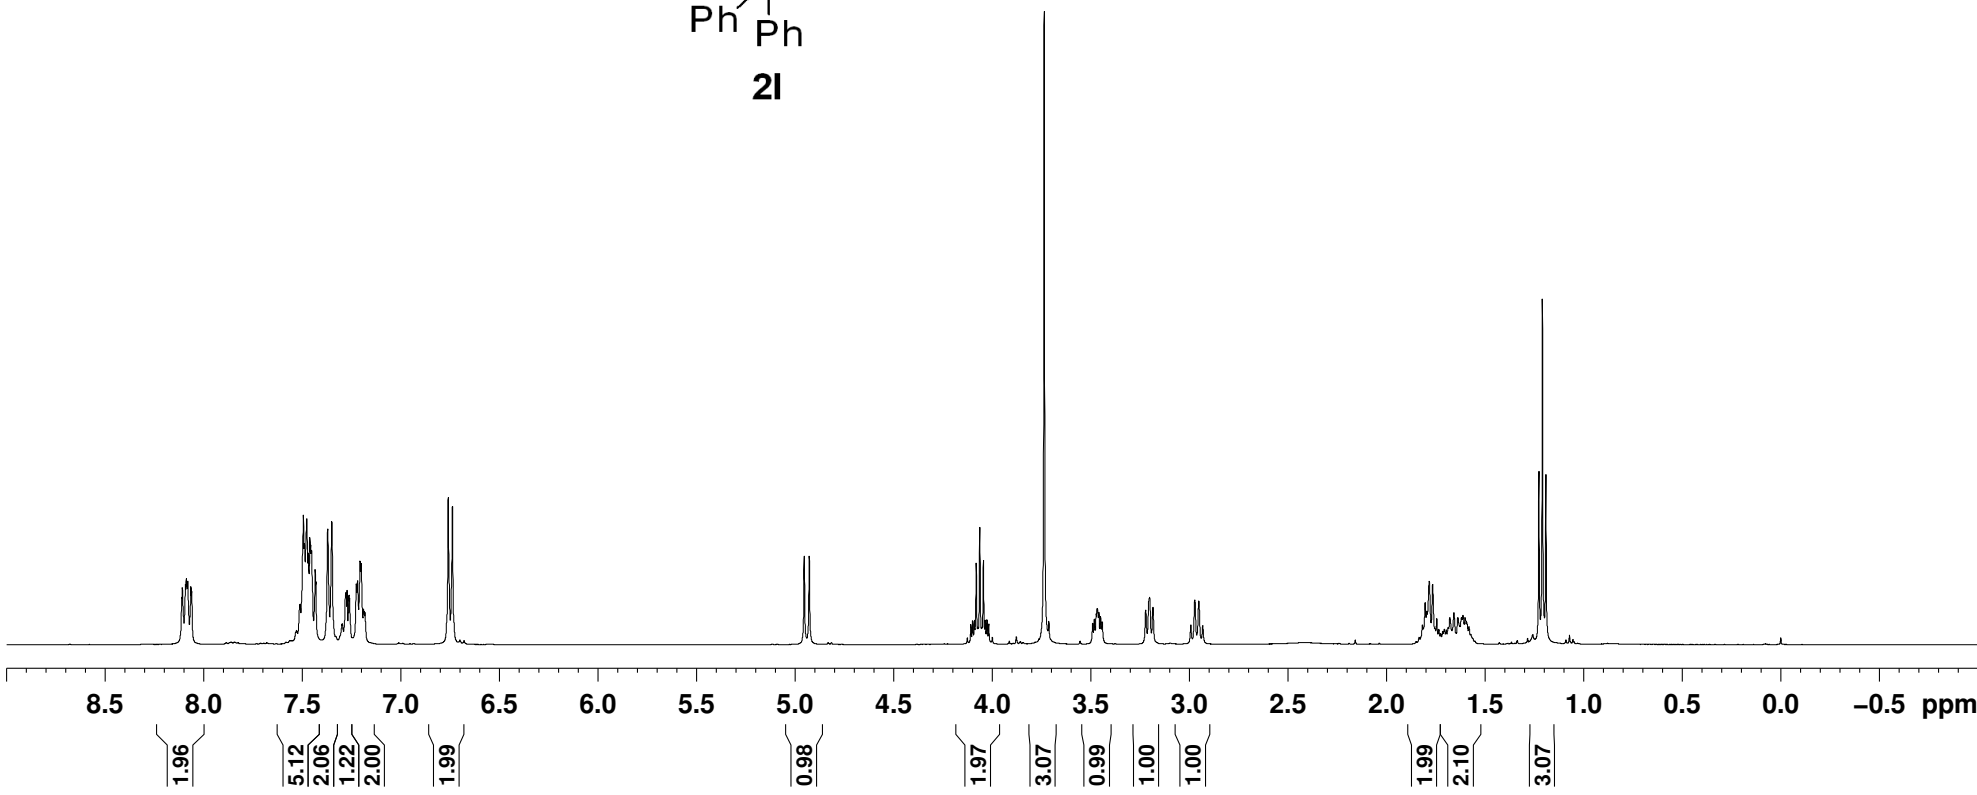

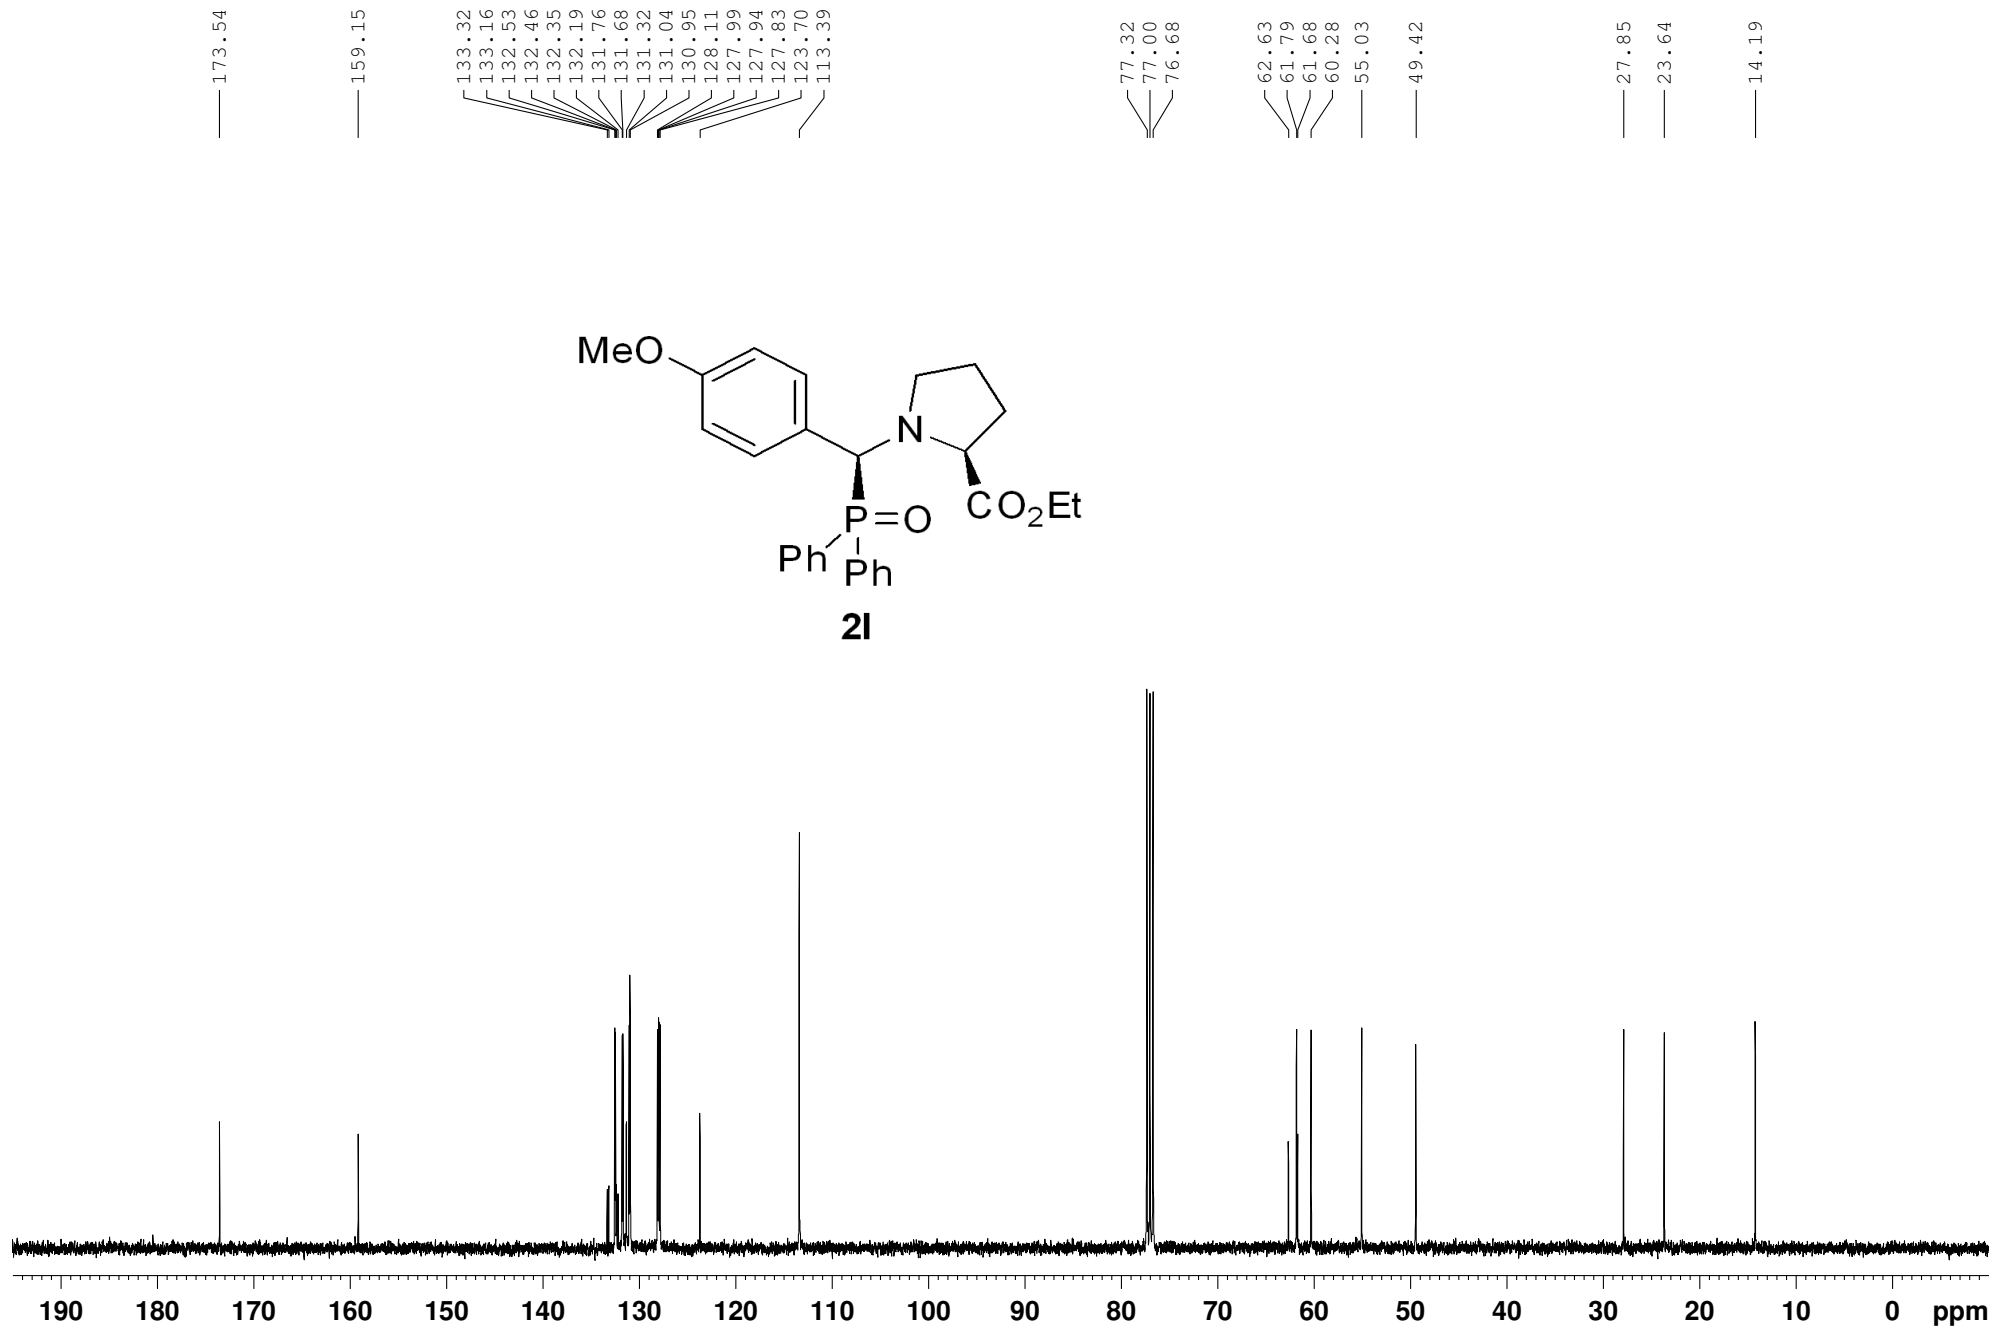



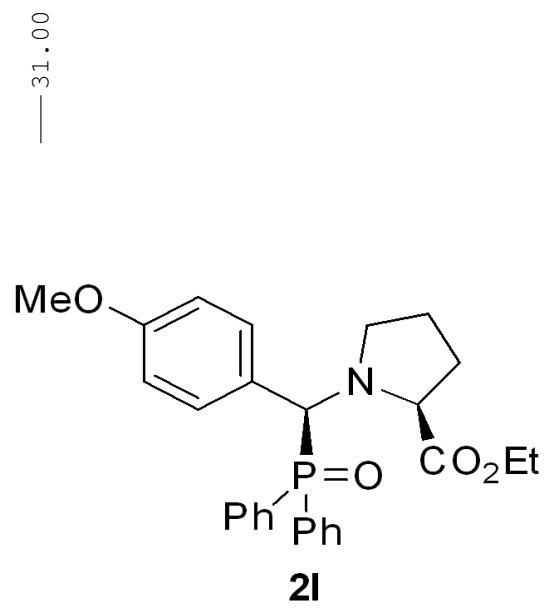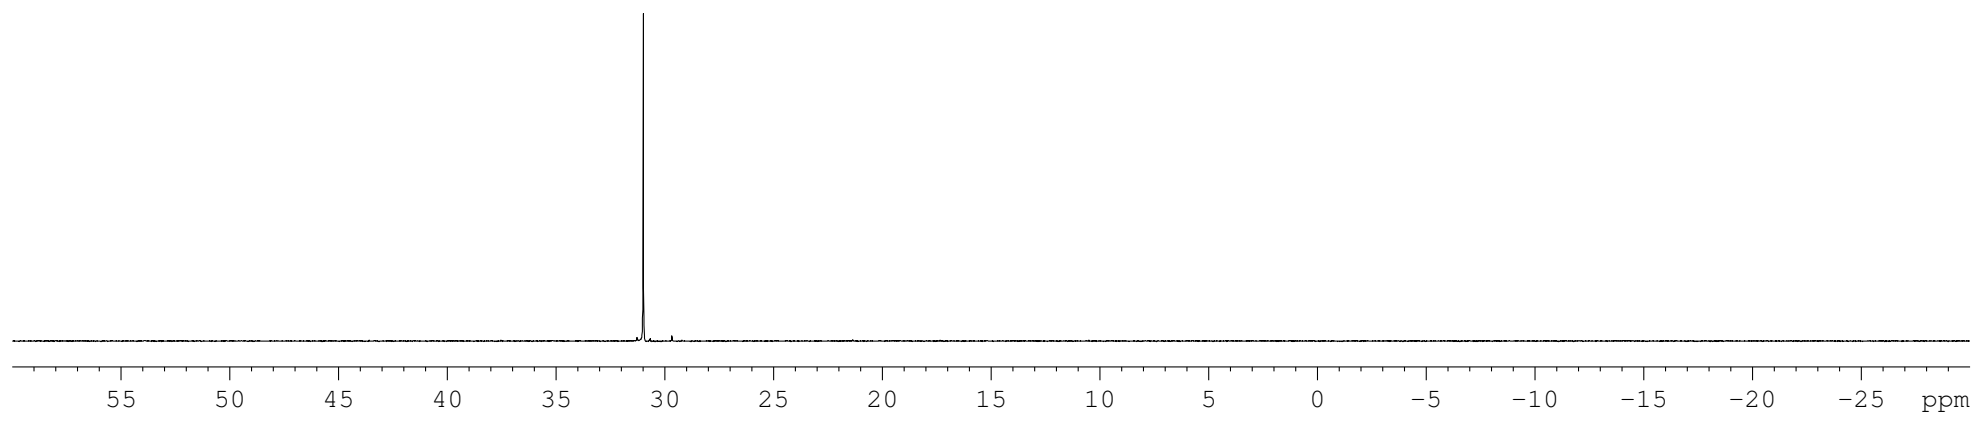

8.158  
8.142  
8.138  
8.133  
8.130  
8.114  
8.074  
8.054  
8.052  
8.027  
7.983  
7.964  
7.570  
7.552  
7.532  
7.525  
7.511  
7.483  
7.465  
7.457  
7.438  
7.418  
7.322  
7.303  
7.290  
7.285  
7.245  
7.239  
7.226  
7.222  
7.209  
7.202

5.181  
5.159

4.128  
4.110  
4.090  
4.081  
3.442  
3.436  
3.432  
3.425  
3.420  
3.415  
3.403  
3.190  
3.172  
3.154  
3.025  
3.004

1.849  
1.831  
1.813  
1.708  
1.690  
1.672  
1.661  
1.241  
1.224  
1.206

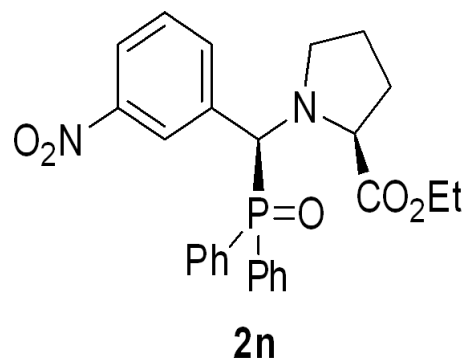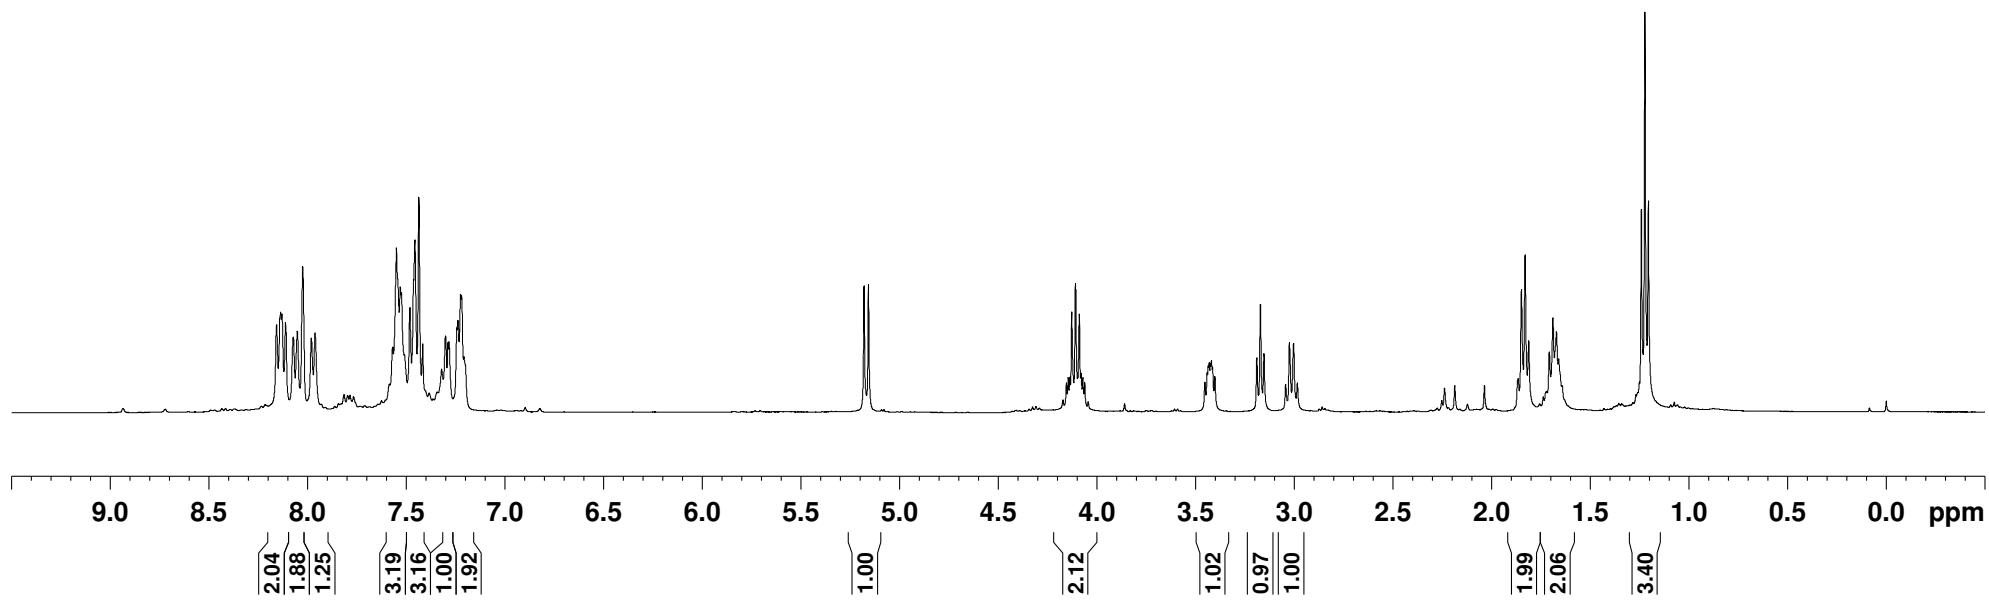

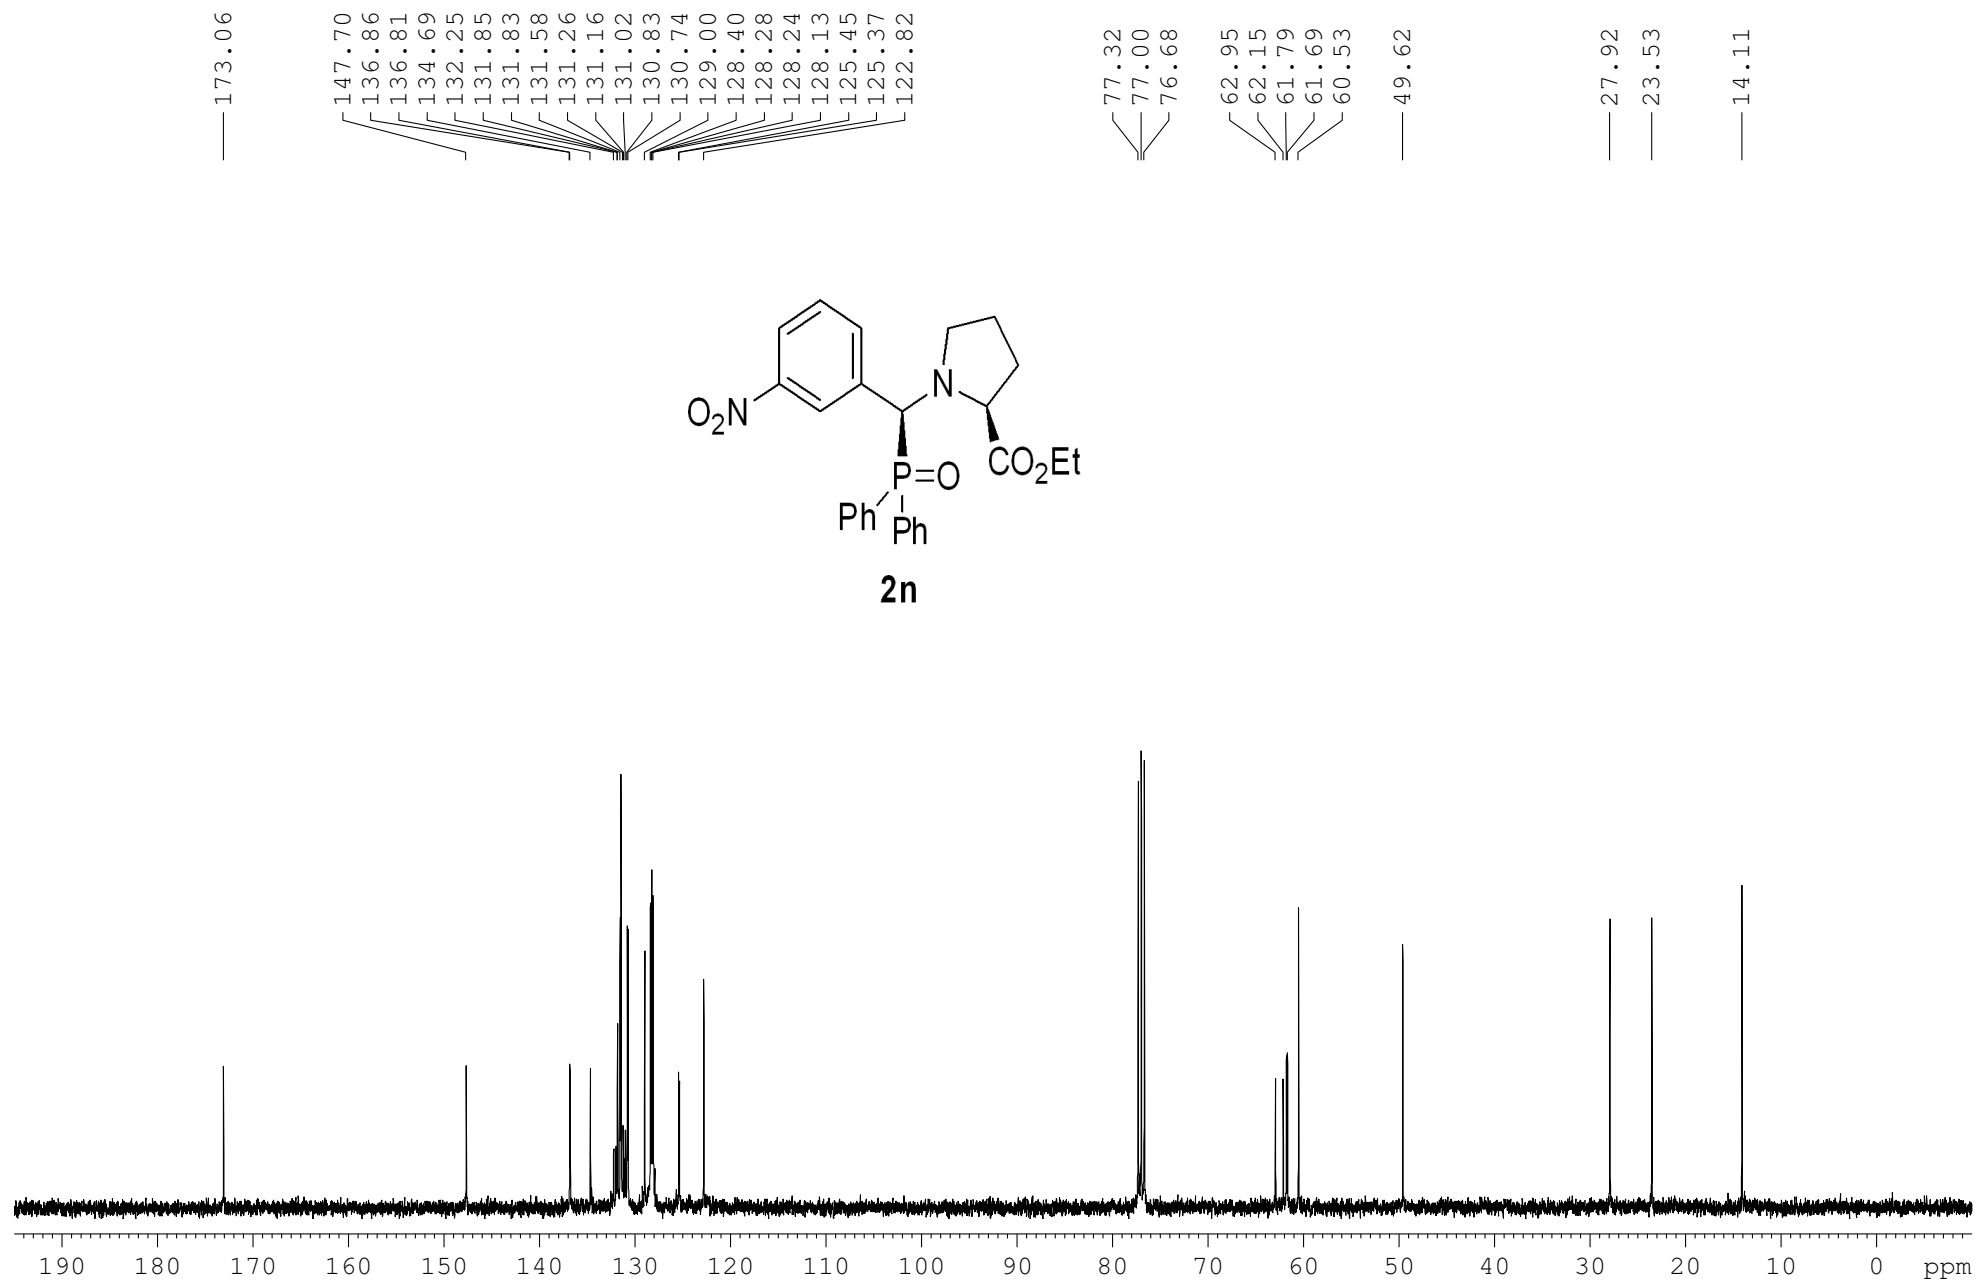

— 30.07

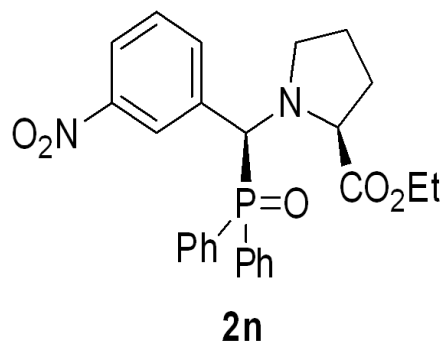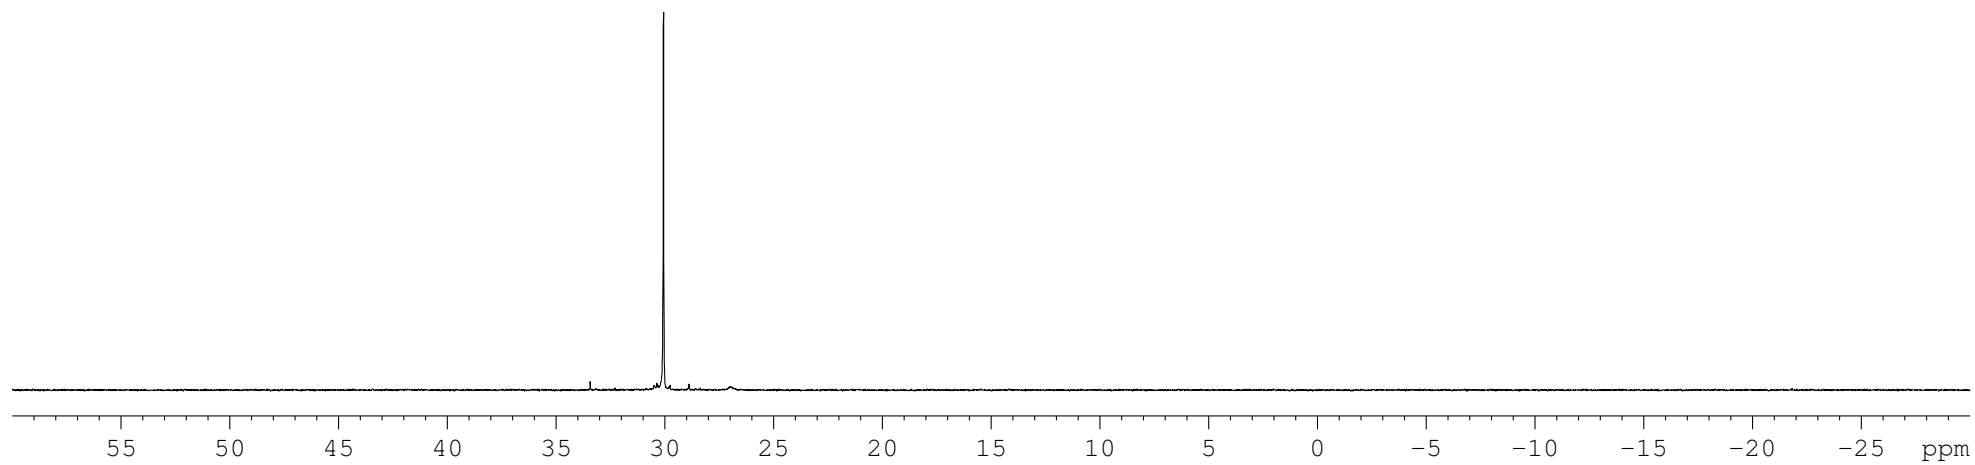

8.103  
8.086  
8.082  
7.562  
7.548  
7.544  
7.539  
7.533  
7.512  
7.504  
7.482  
7.455  
7.437  
7.434  
7.427  
7.410  
7.406  
7.344  
7.341  
7.326  
7.323  
7.307  
7.304  
7.278  
7.252  
7.245  
7.233  
7.226  
7.215  
7.207

5.094  
5.071

4.110  
4.103  
4.092  
4.086  
4.074  
4.068  
4.056  
4.050  
3.451  
3.444  
3.439  
3.434  
3.429  
3.422  
3.412  
3.158  
3.140  
3.122  
2.999  
2.978

1.837  
1.818  
1.800  
1.683  
1.665  
1.230  
1.212  
1.194

0.000

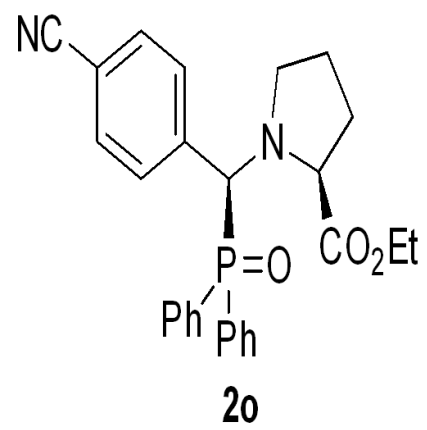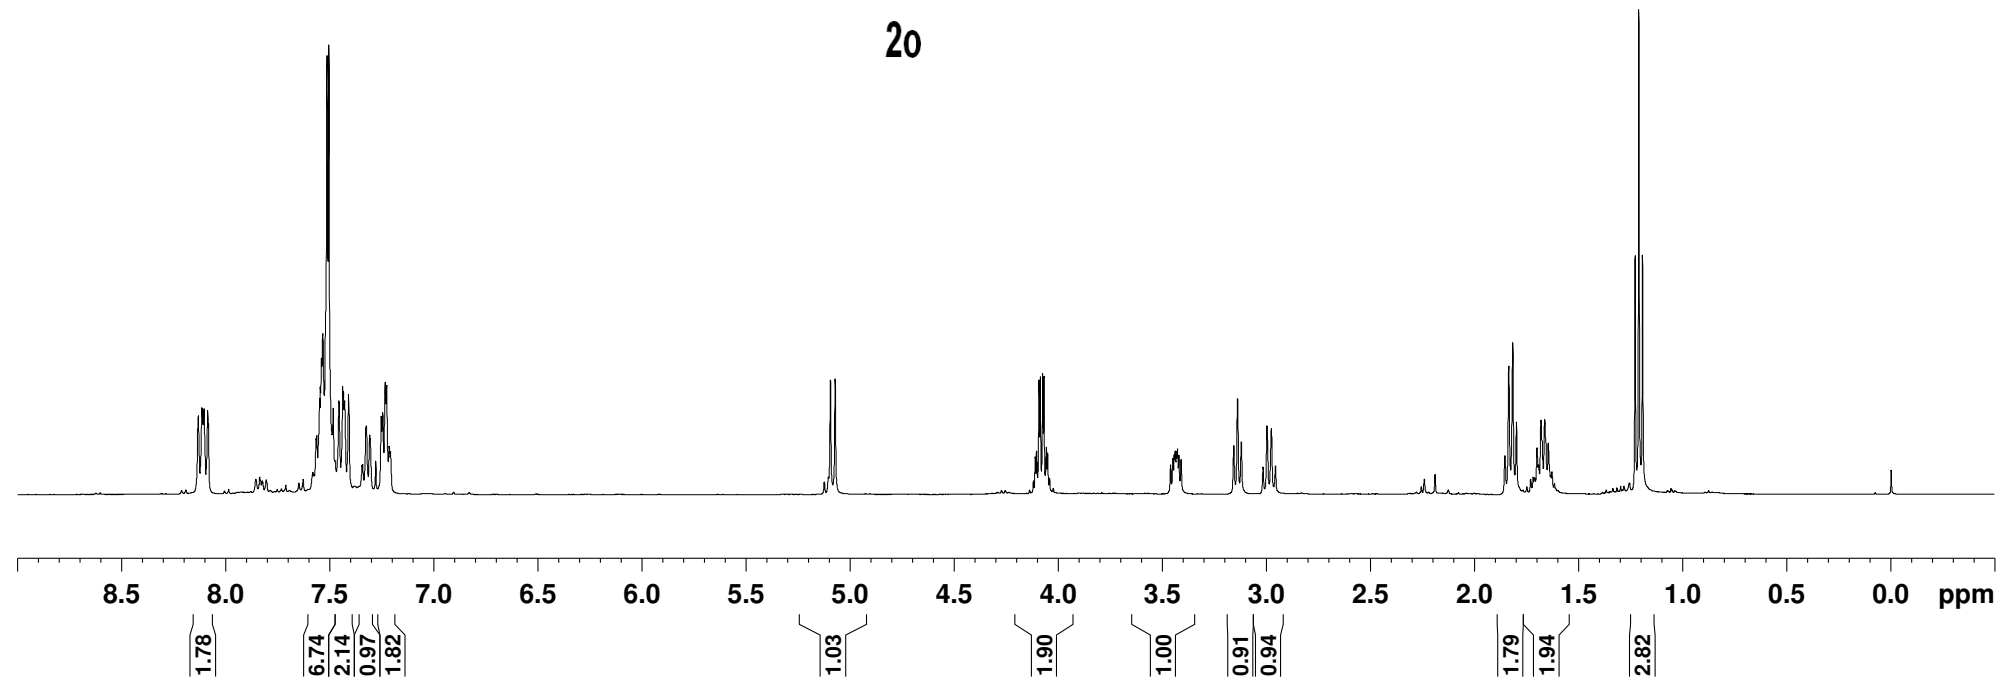

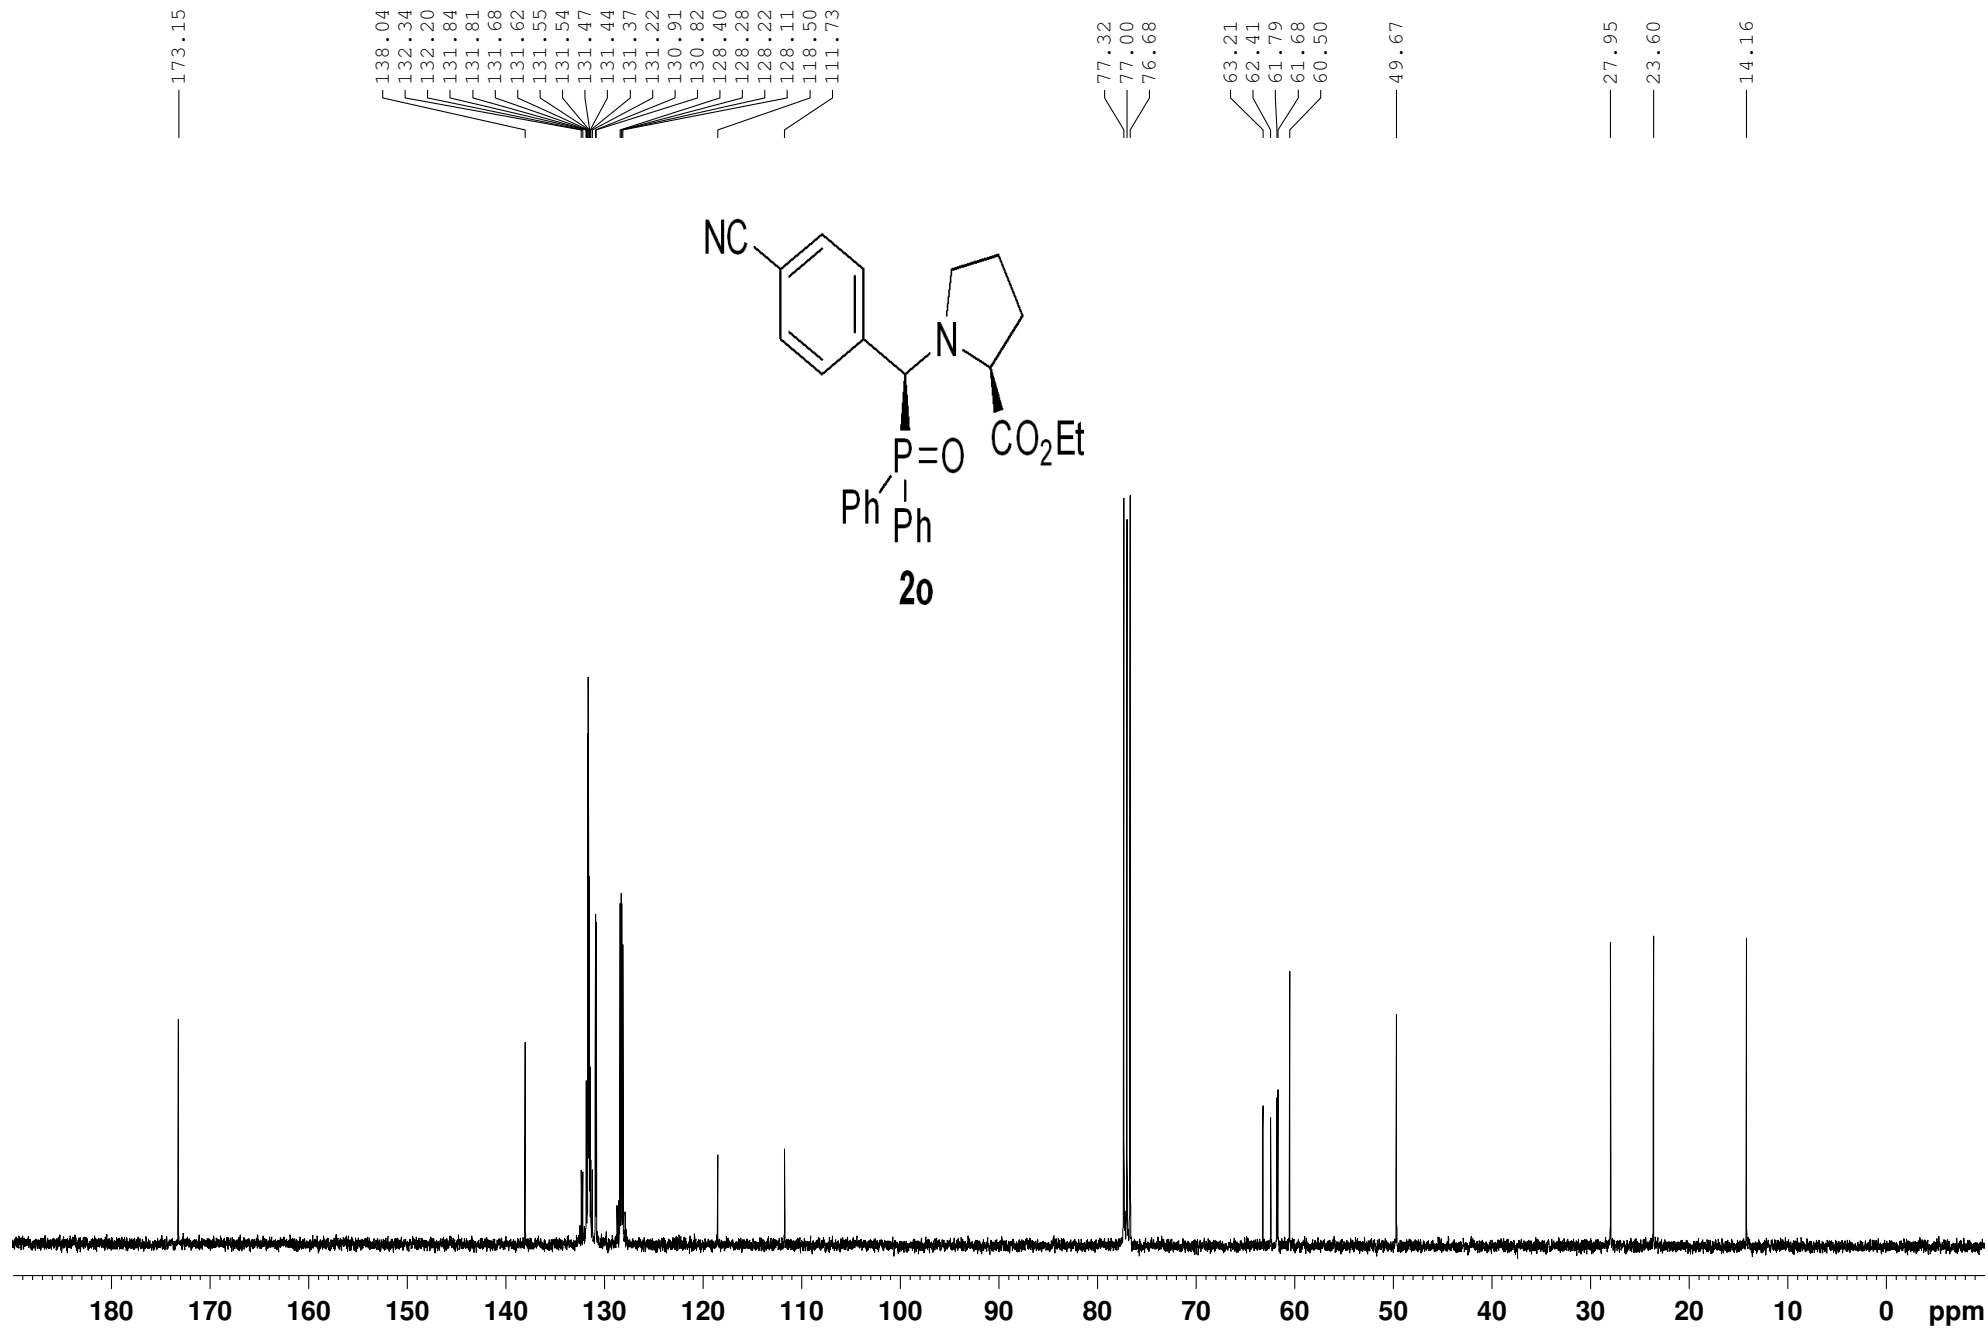

— 29.93

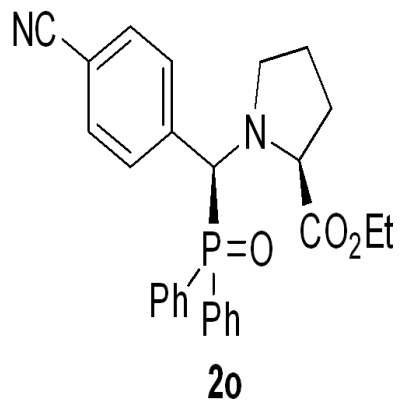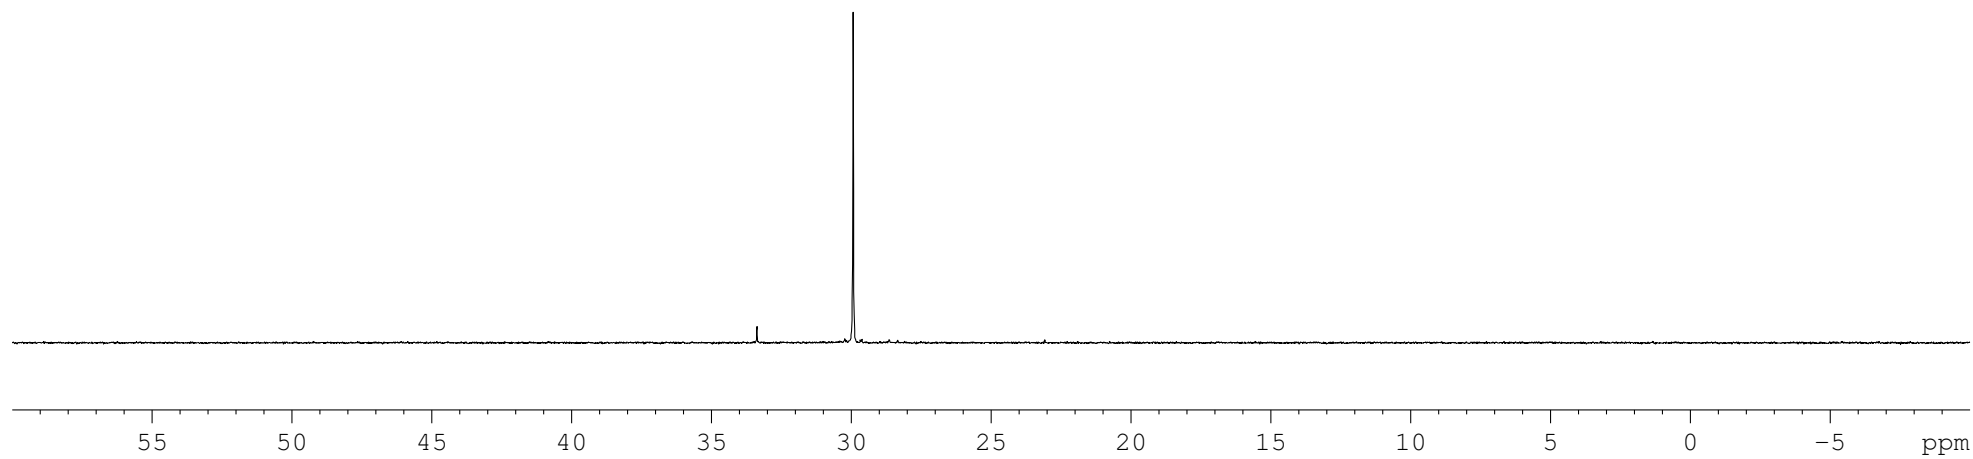

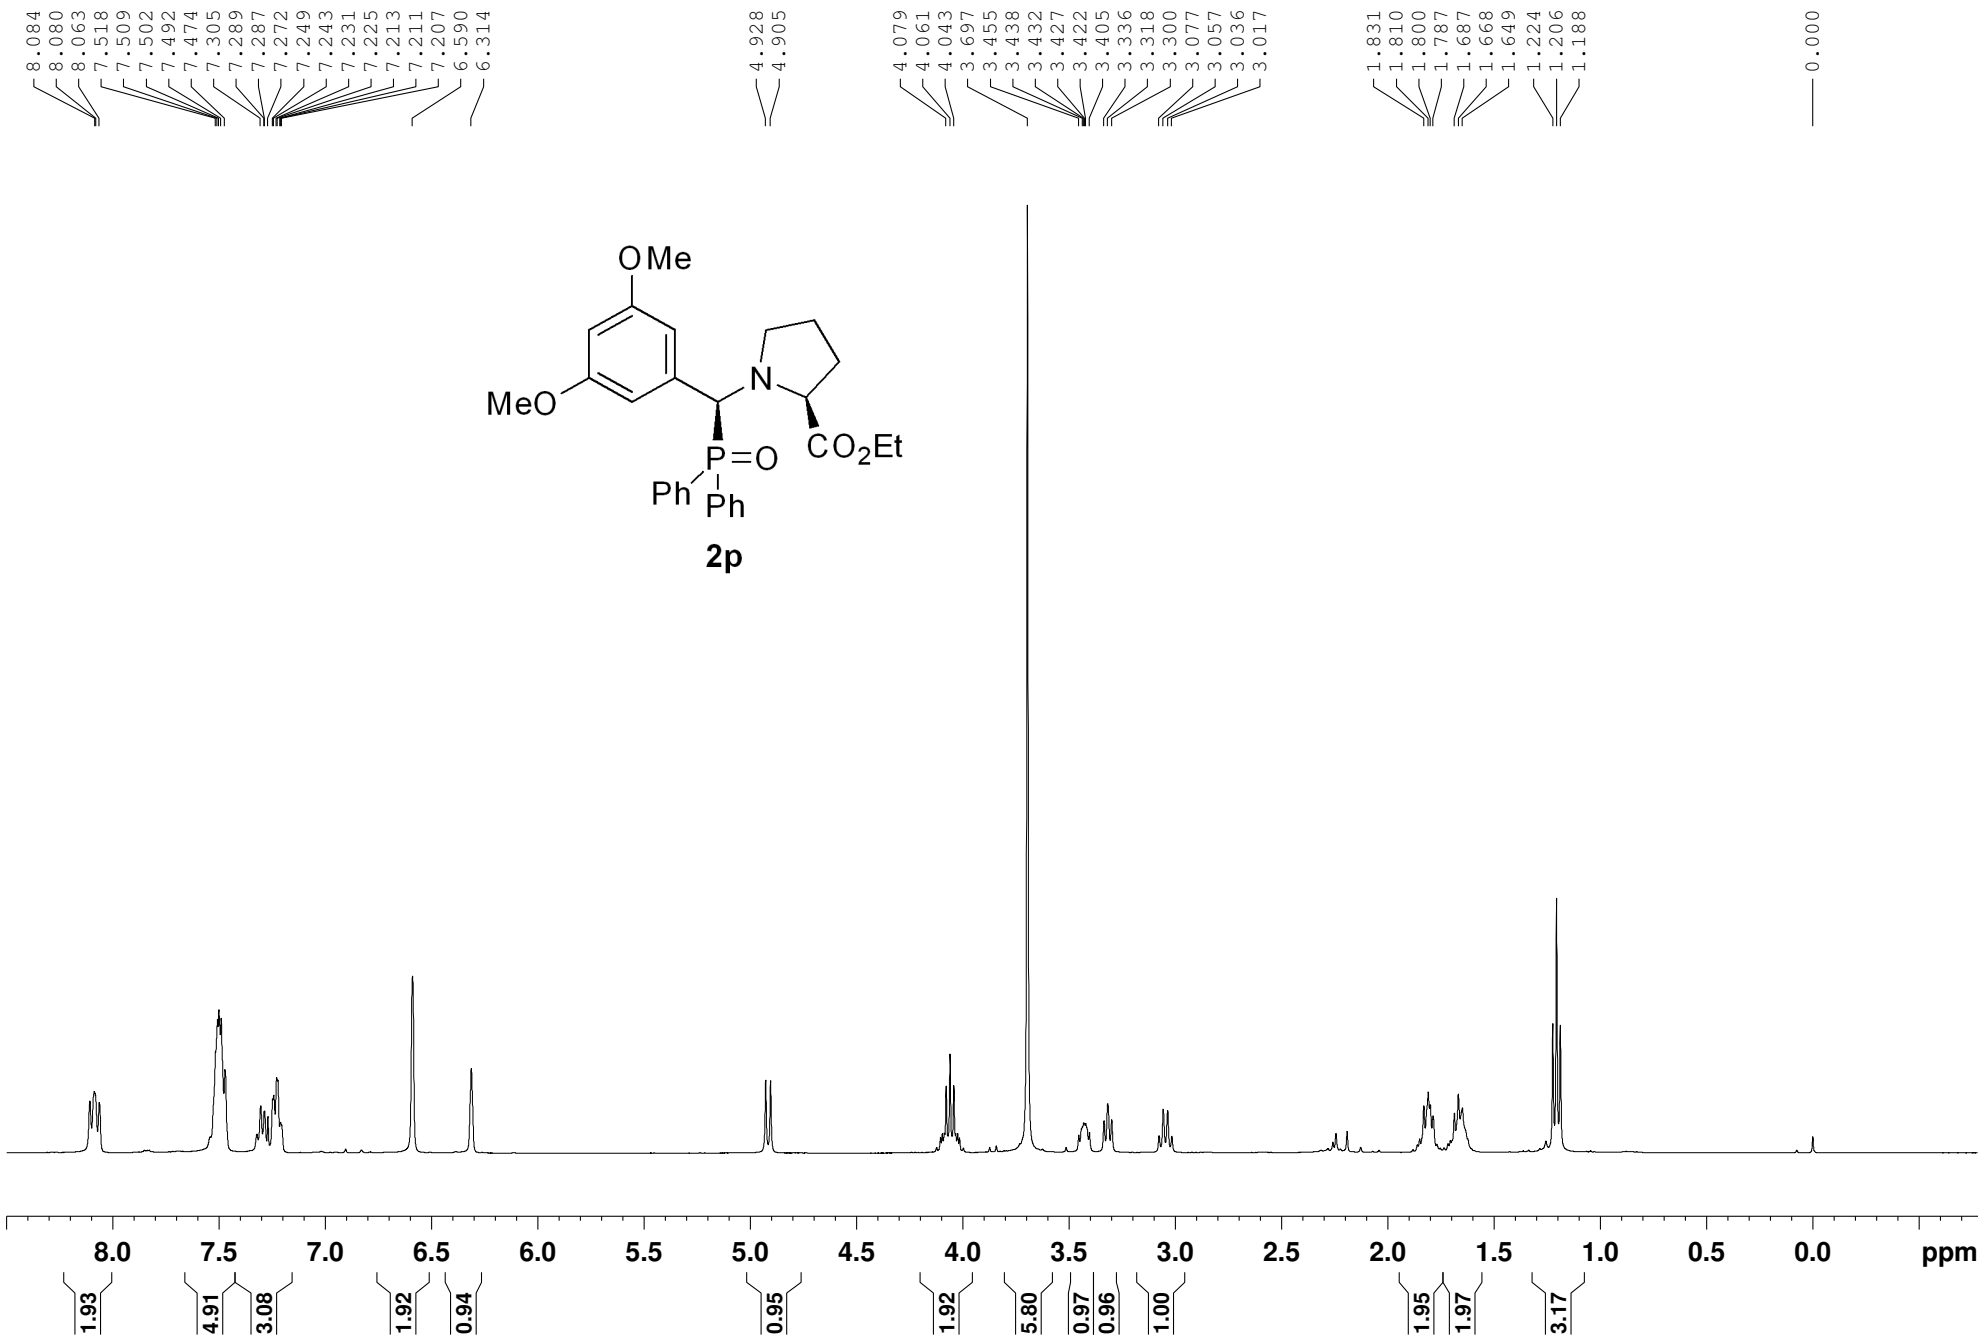



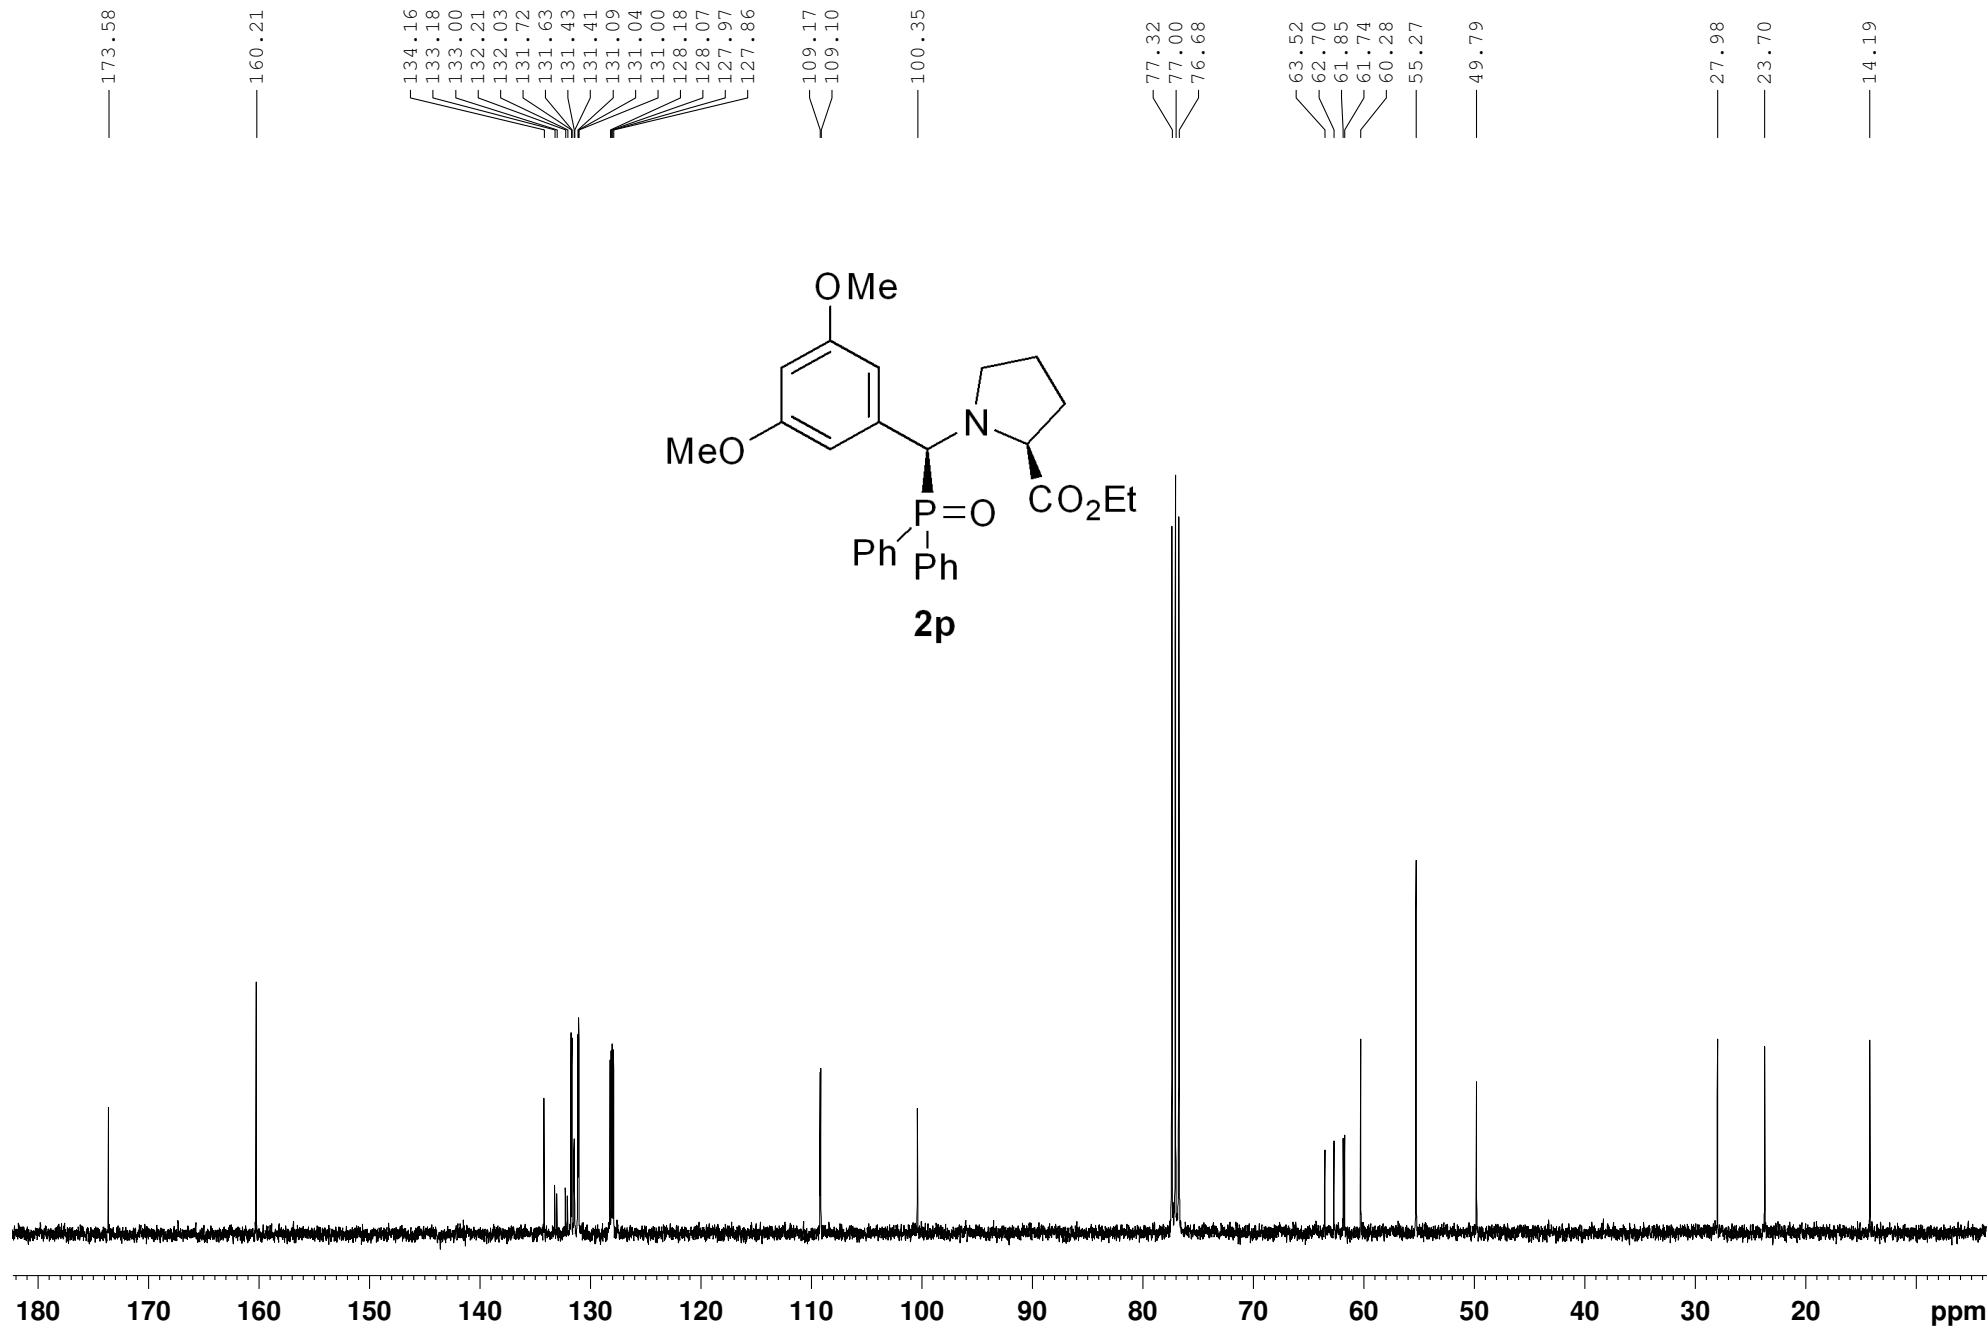

— 30.41

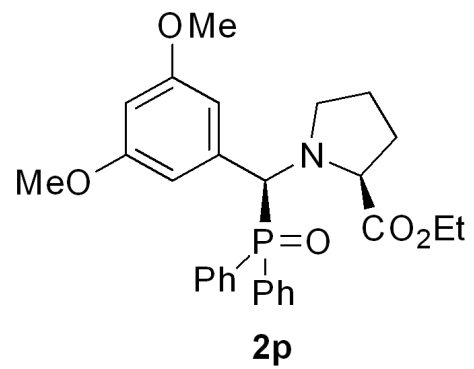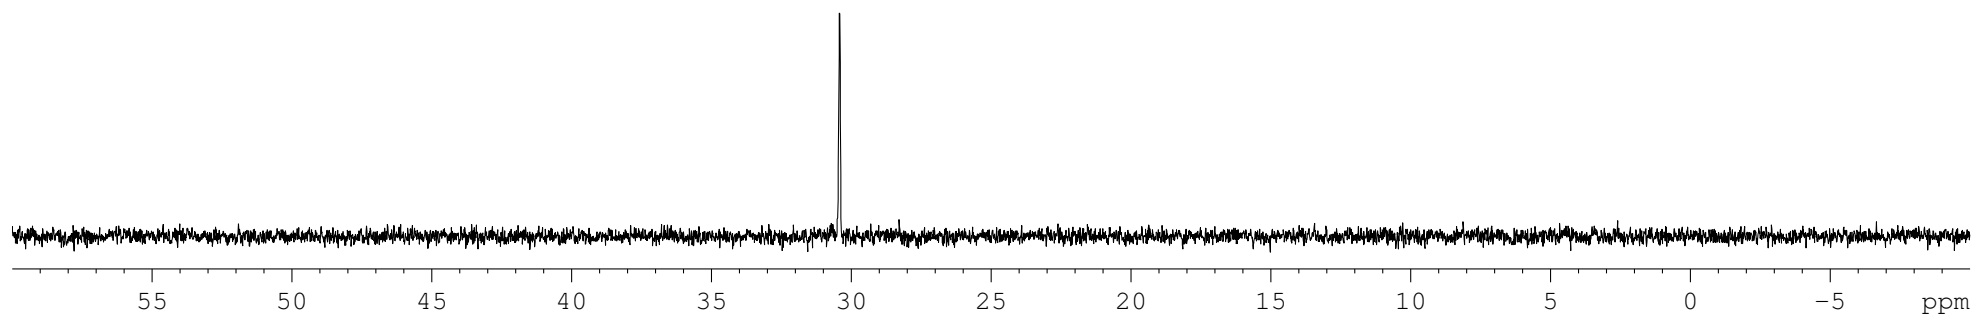

7.936  
7.916  
7.910  
7.889  
7.885  
7.882  
7.856  
7.836  
7.817  
7.495  
7.476  
7.461  
7.447  
7.442  
7.420  
7.415  
7.396  
7.380  
7.286  
4.122  
4.117  
4.105  
4.099  
4.088  
4.081  
4.071  
4.053  
4.011  
3.989  
3.975  
3.965  
3.957  
3.930  
3.918  
3.901  
3.883  
3.865  
3.685  
3.668  
3.652  
3.378  
3.367  
3.358  
3.349  
3.331  
3.124  
3.110  
2.838  
2.820  
1.930  
1.913  
1.895  
1.878  
1.862  
1.836  
1.823  
1.810  
1.798  
1.784  
1.773  
1.758  
1.738  
1.710  
1.693  
1.676  
1.658  
1.632  
1.620  
1.608  
1.599  
1.581  
1.569  
1.544  
1.531  
1.512  
1.254  
1.236  
1.218  
1.175  
1.157  
1.139  
0.865  
0.848  
0.829  
0.819  
0.800  
0.782

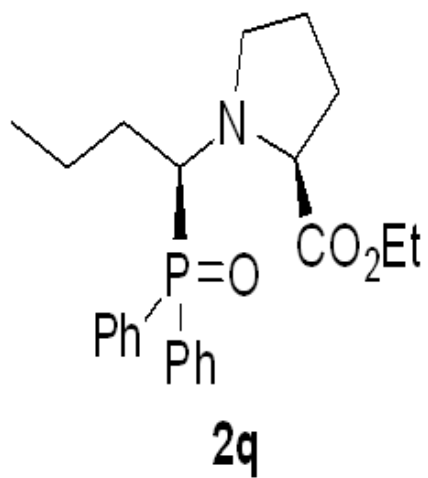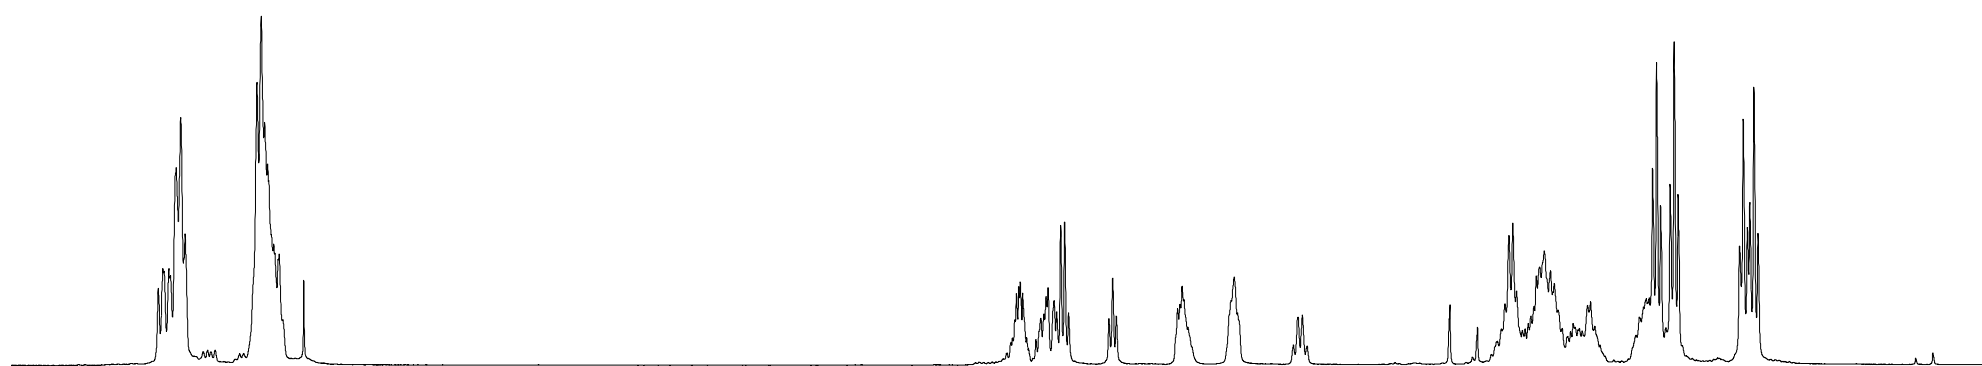

8.5    8.0    7.5    7.0    6.5    6.0    5.5    5.0    4.5    4.0    3.5    3.0    2.5    2.0    1.5    1.0    0.5    ppm

4.06    6.26

1.07    2.08    0.52    1.02    1.00    0.52

2.11    2.33    2.00    2.94    2.20    3.21

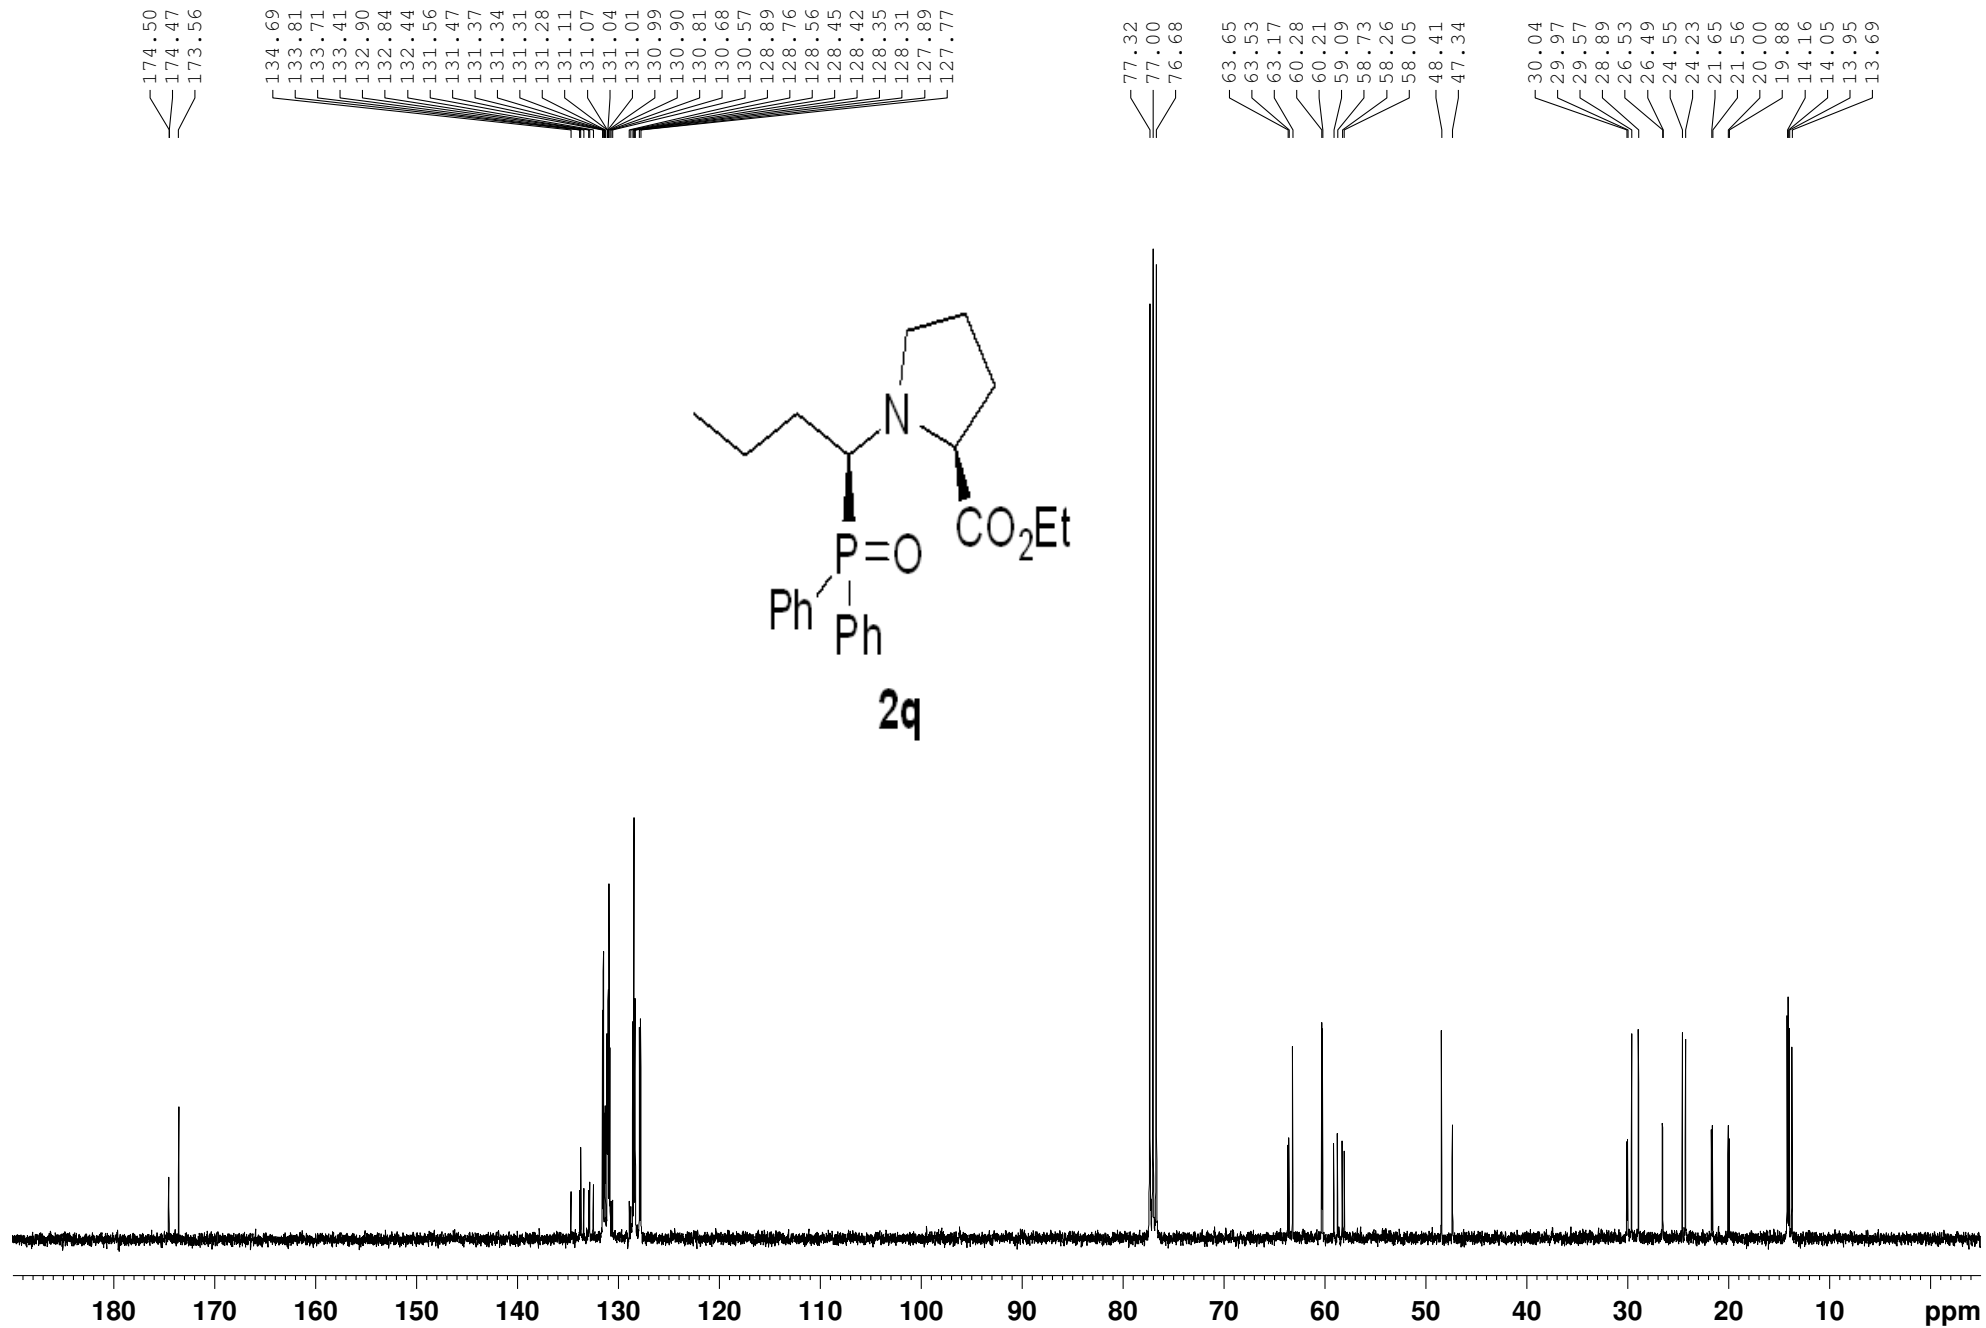

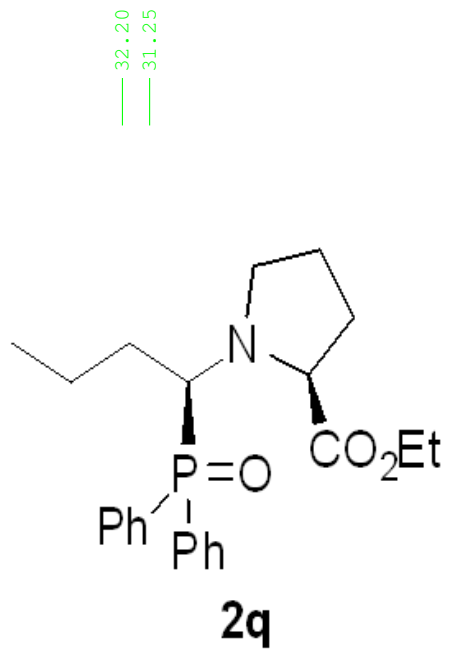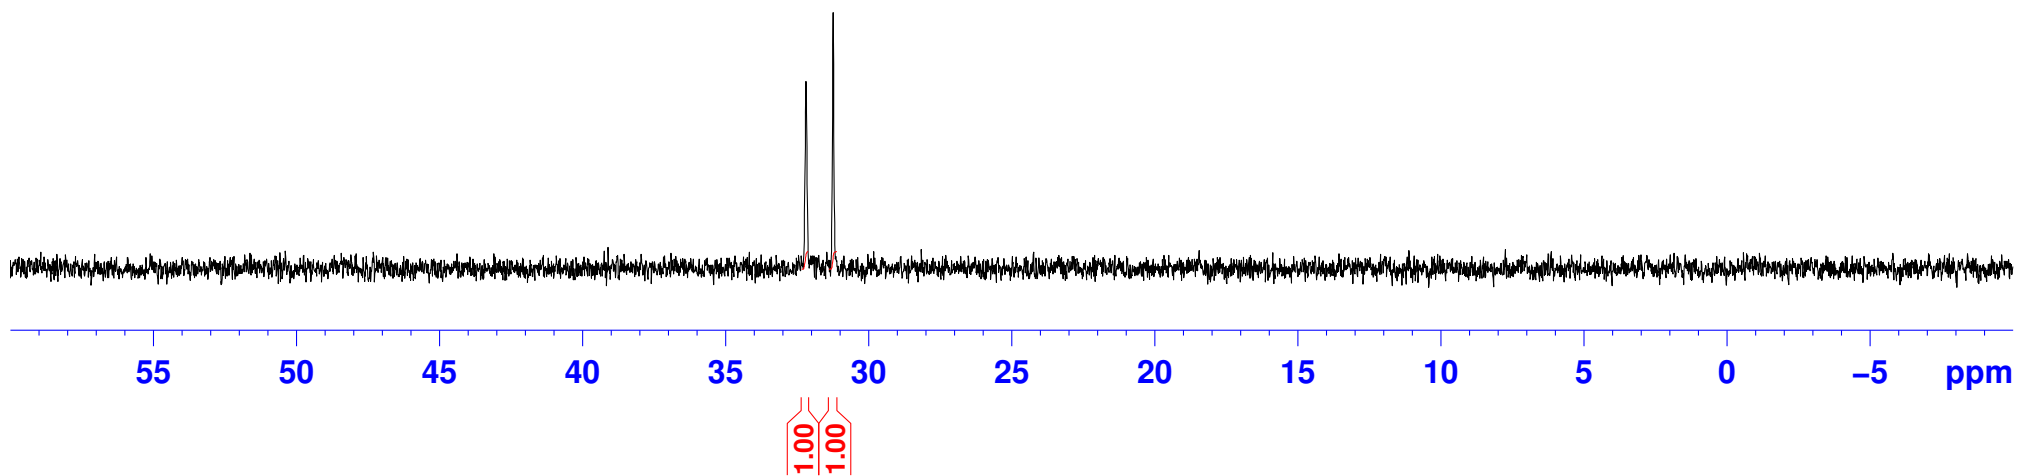

7.936  
7.915  
7.909  
7.887  
7.882  
7.858  
7.834  
7.813  
7.494  
7.479  
7.476  
7.460  
7.447  
7.440  
7.422  
7.402  
7.396  
7.281  
4.110  
4.096  
4.091  
4.078  
4.073  
4.060  
4.055  
3.978  
3.970  
3.956  
3.935  
3.916  
3.900  
3.882  
3.864  
3.687  
3.671  
3.654  
3.373  
3.365  
3.354  
3.344  
3.336  
3.161  
3.153  
3.138  
3.132  
3.123  
3.115  
2.849  
2.828  
1.918  
1.901  
1.883  
1.866  
1.823  
1.811  
1.798  
1.770  
1.749  
1.741  
1.725  
1.700  
1.683  
1.607  
1.596  
1.587  
1.574  
1.568  
1.559  
1.546  
1.524  
1.502  
1.274  
1.257  
1.240  
1.222  
1.207  
1.197  
1.188  
1.174  
1.139  
1.136  
0.832  
0.815  
0.797  
0.772  
0.755  
0.737

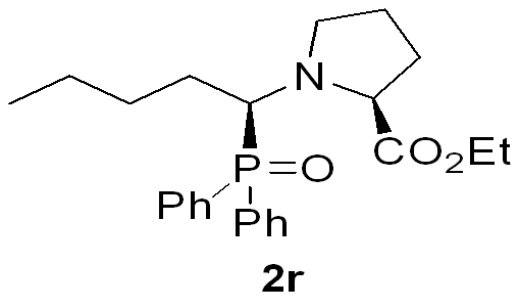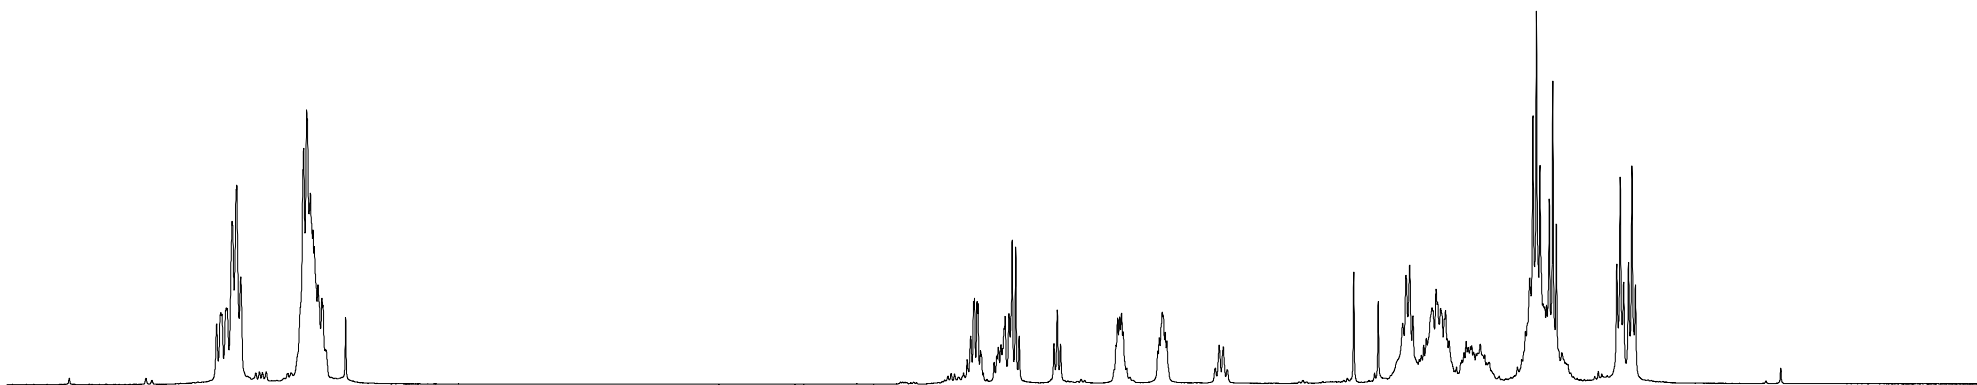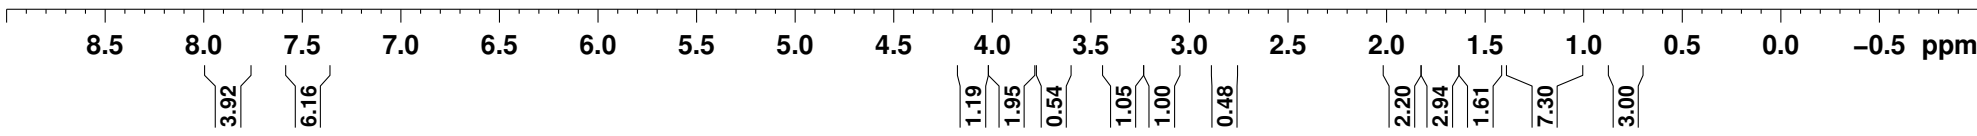

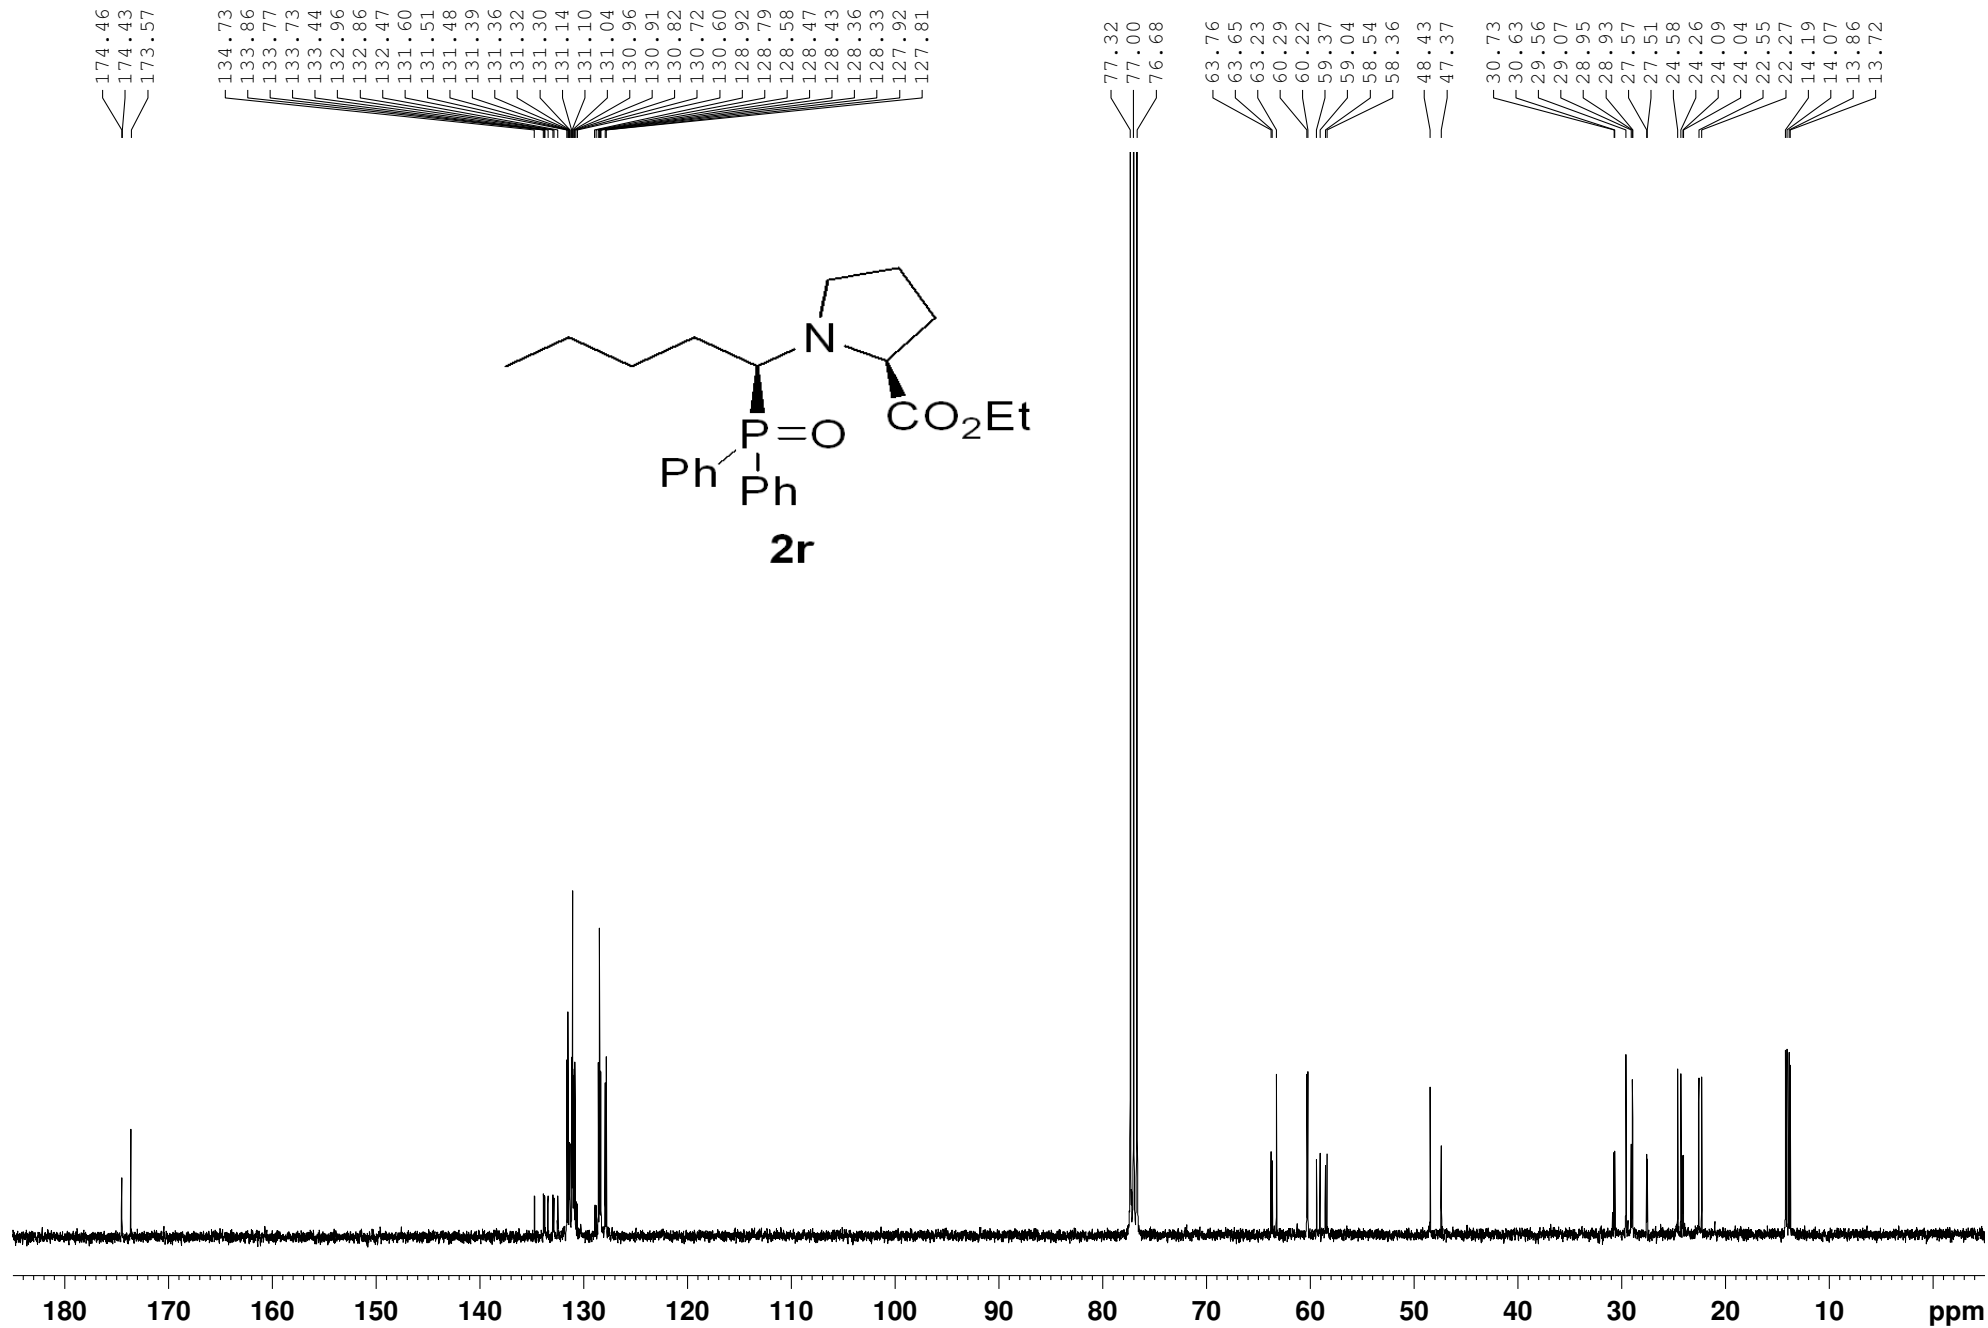

32.24  
31.25

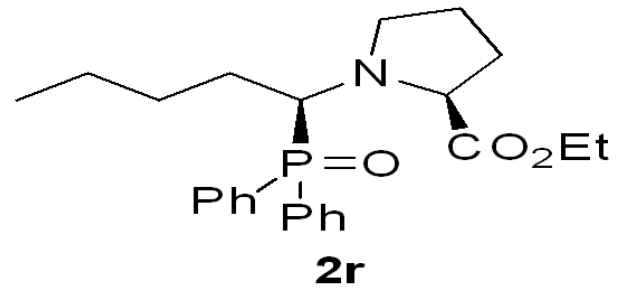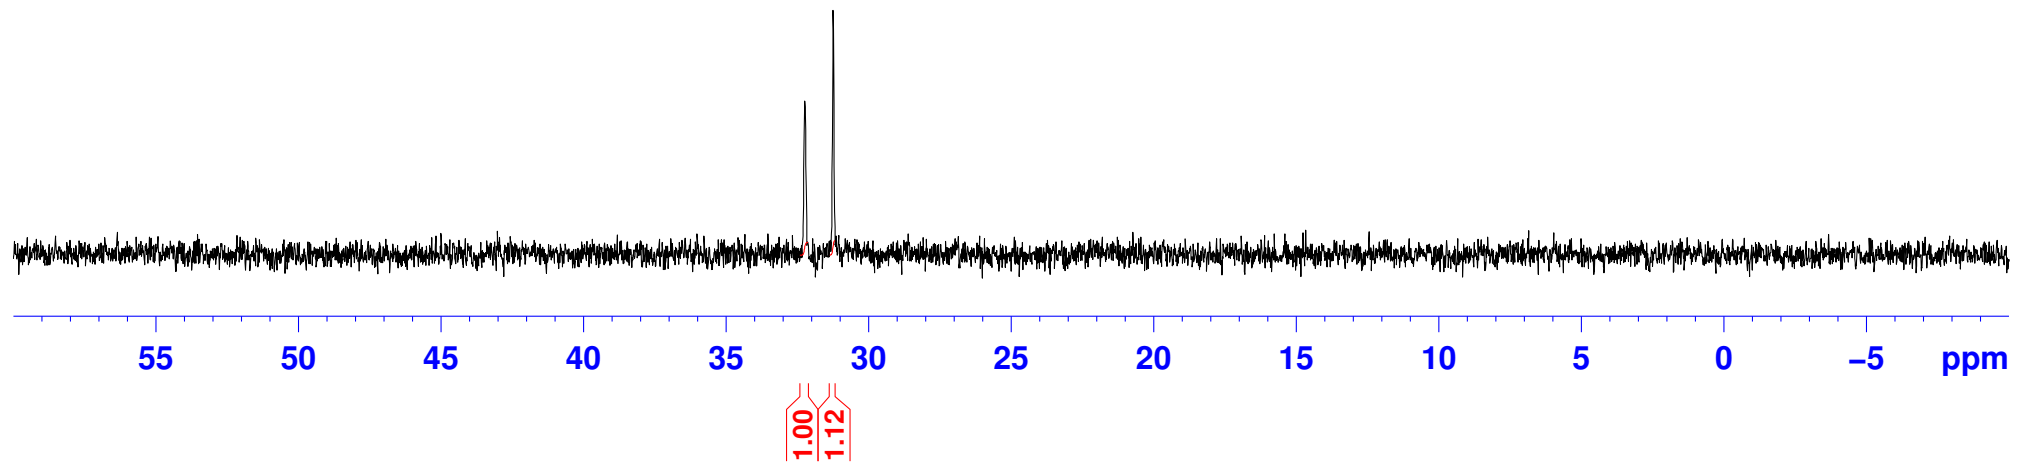



8.102  
8.085  
8.082  
8.077  
8.074  
8.057  
8.053  
7.585  
7.568  
7.564  
7.558  
7.540  
7.537  
7.517  
7.514  
7.500  
7.496  
7.492  
7.484  
7.473  
7.466  
7.457  
7.451  
7.449  
7.365  
7.362  
7.347  
7.344  
7.315  
7.308  
7.292  
7.289  
7.279  
7.276  
7.271  
6.609  
6.606  
6.273  
6.268  
6.265  
6.260  
5.229  
5.197  
4.114  
4.111  
4.096  
4.093  
4.078  
4.075  
4.065  
4.060  
4.057  
3.442  
3.433  
3.423  
3.418  
3.409  
3.400  
3.391  
3.298  
3.279  
3.260  
2.965  
2.944  
2.923  
2.902  
1.856  
1.852  
1.837  
1.817  
1.798  
1.692  
1.682  
1.662  
1.642  
1.622  
1.618  
1.613  
1.609  
1.603  
1.599  
1.594  
1.591  
1.584  
1.239  
1.221  
1.203

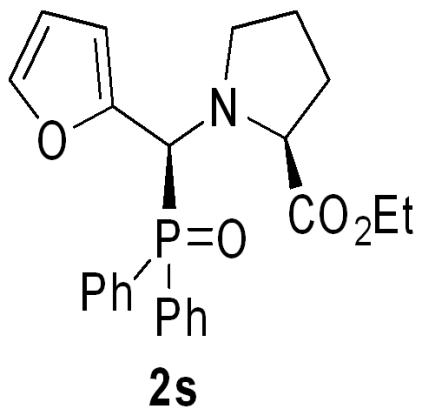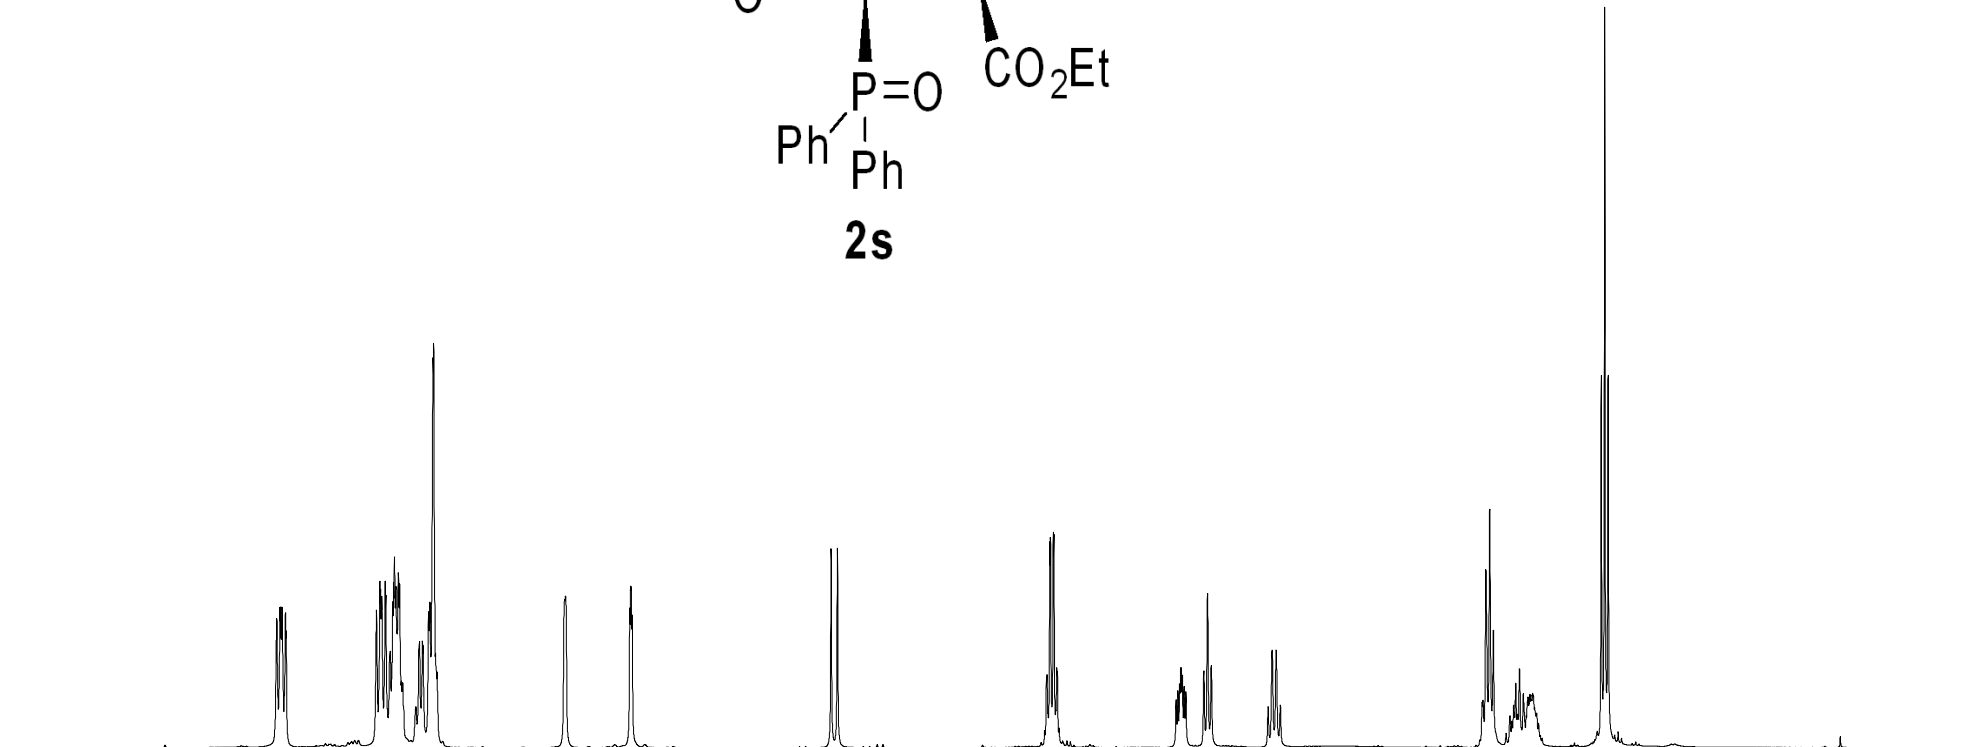

9.0 8.5 8.0 7.5 7.0 6.5 6.0 5.5 5.0 4.5 4.0 3.5 3.0 2.5 2.0 1.5 1.0 0.5 0.0 ppm

2.00  
5.16  
4.15  
0.97  
0.98  
0.98  
2.00  
1.01  
1.02  
1.02  
2.04  
2.10  
3.07

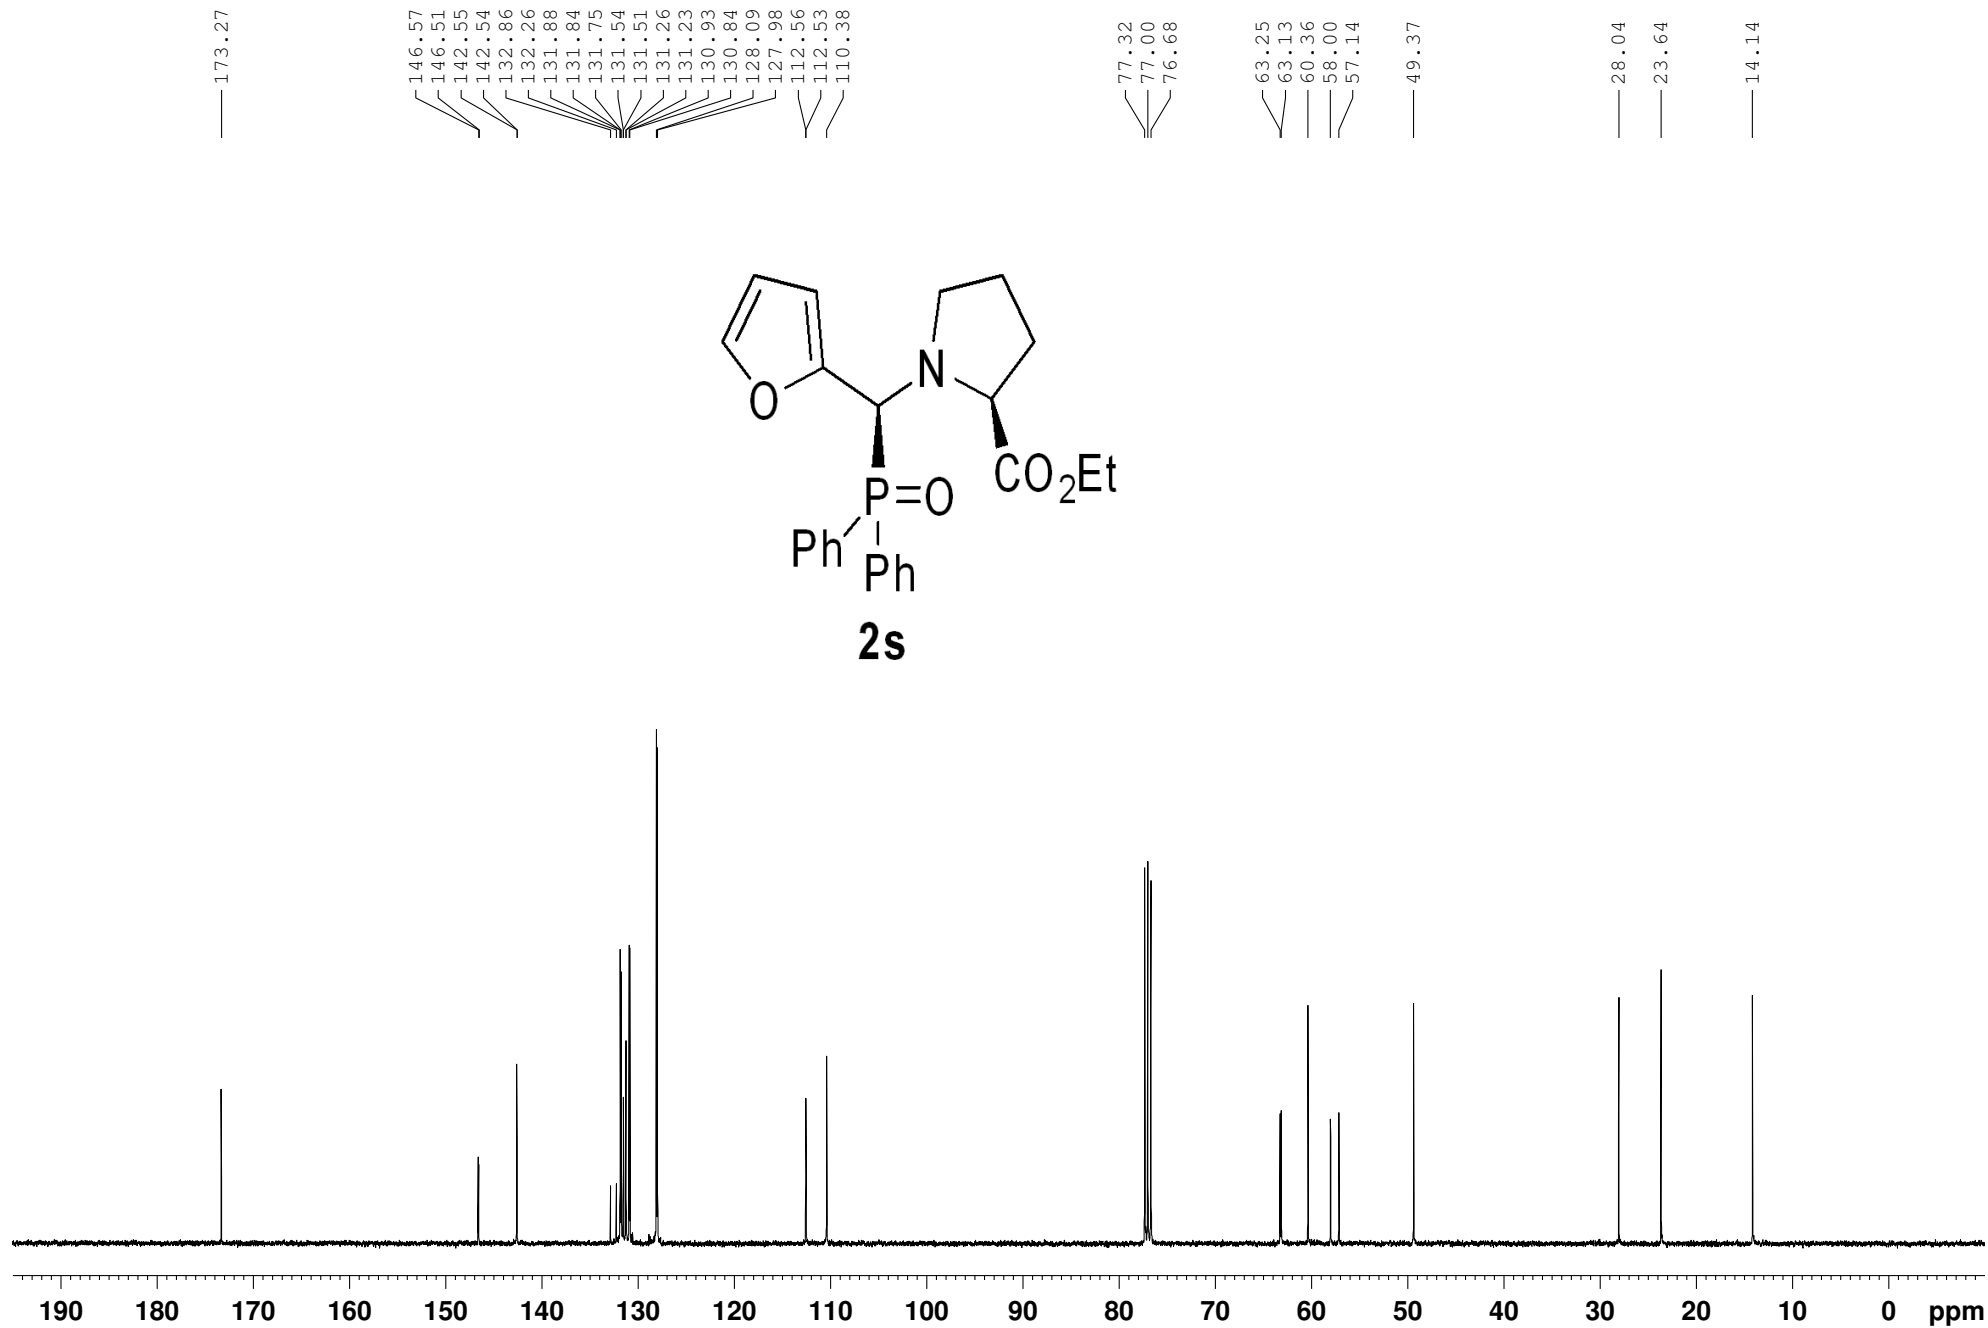

29.54

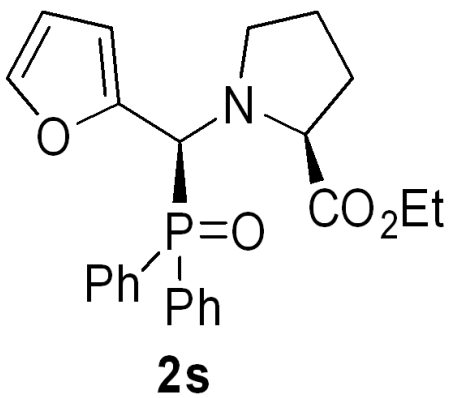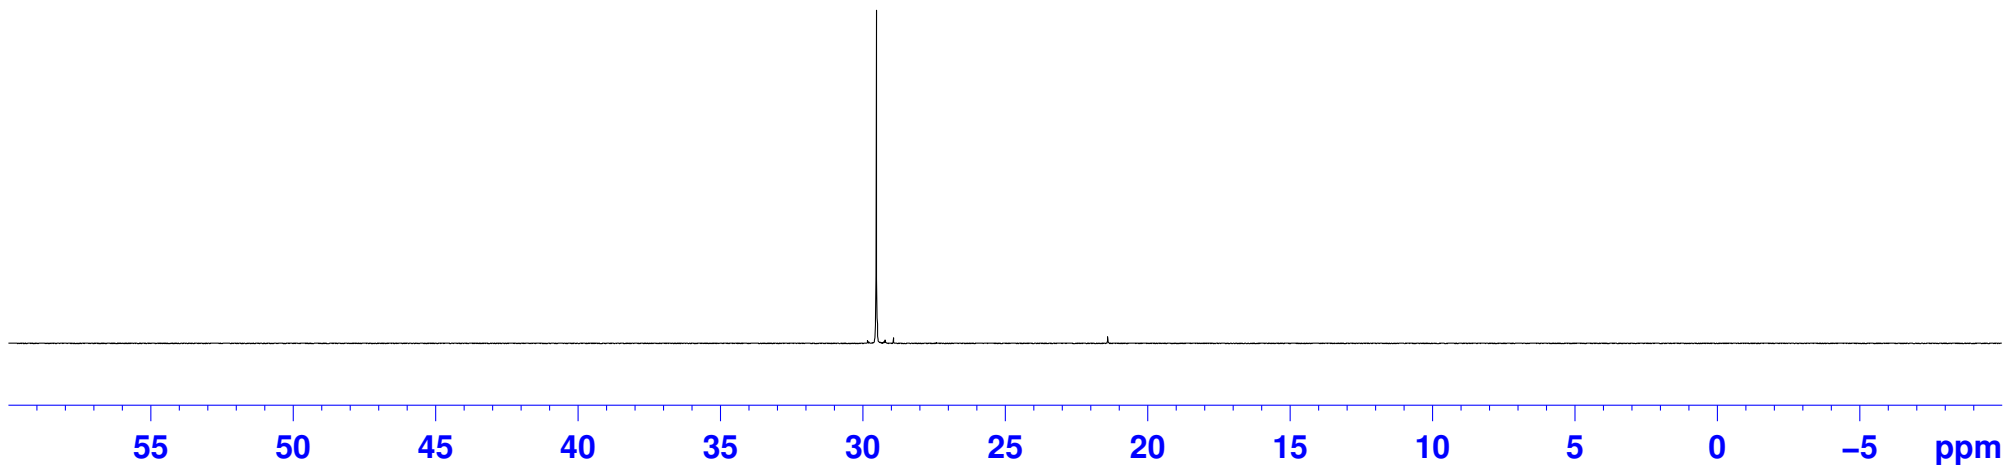

8.407  
8.396  
8.110  
8.094  
8.090  
8.085  
8.082  
8.066  
8.062  
7.849  
7.830  
7.597  
7.592  
7.578  
7.574  
7.564  
7.558  
7.555  
7.537  
7.534  
7.523  
7.505  
7.487  
7.480  
7.457  
7.449  
7.322  
7.318  
7.303  
7.282  
7.253  
7.246  
7.234  
7.227  
7.216  
7.210  
7.102  
7.090  
7.084  
7.072  
5.314  
5.290  
5.214  
5.196  
4.061  
4.052  
4.043  
4.024  
4.005  
3.996  
3.987  
3.978  
3.866  
3.516  
3.505  
3.498  
3.493  
3.489  
3.484  
3.476  
3.466  
3.454  
3.439  
3.420  
3.202  
3.103  
3.082  
1.819  
1.812  
1.804  
1.794  
1.781  
1.776  
1.757  
1.742  
1.725  
1.706  
1.684  
1.643  
1.632  
1.619  
1.190  
1.172  
1.154  
1.089  
1.072  
1.054

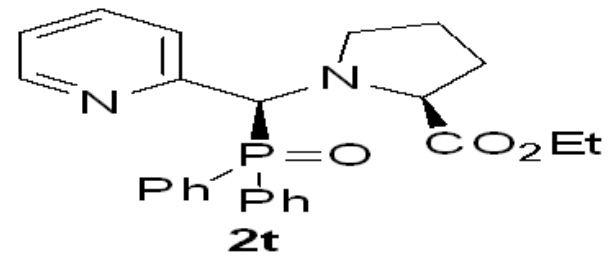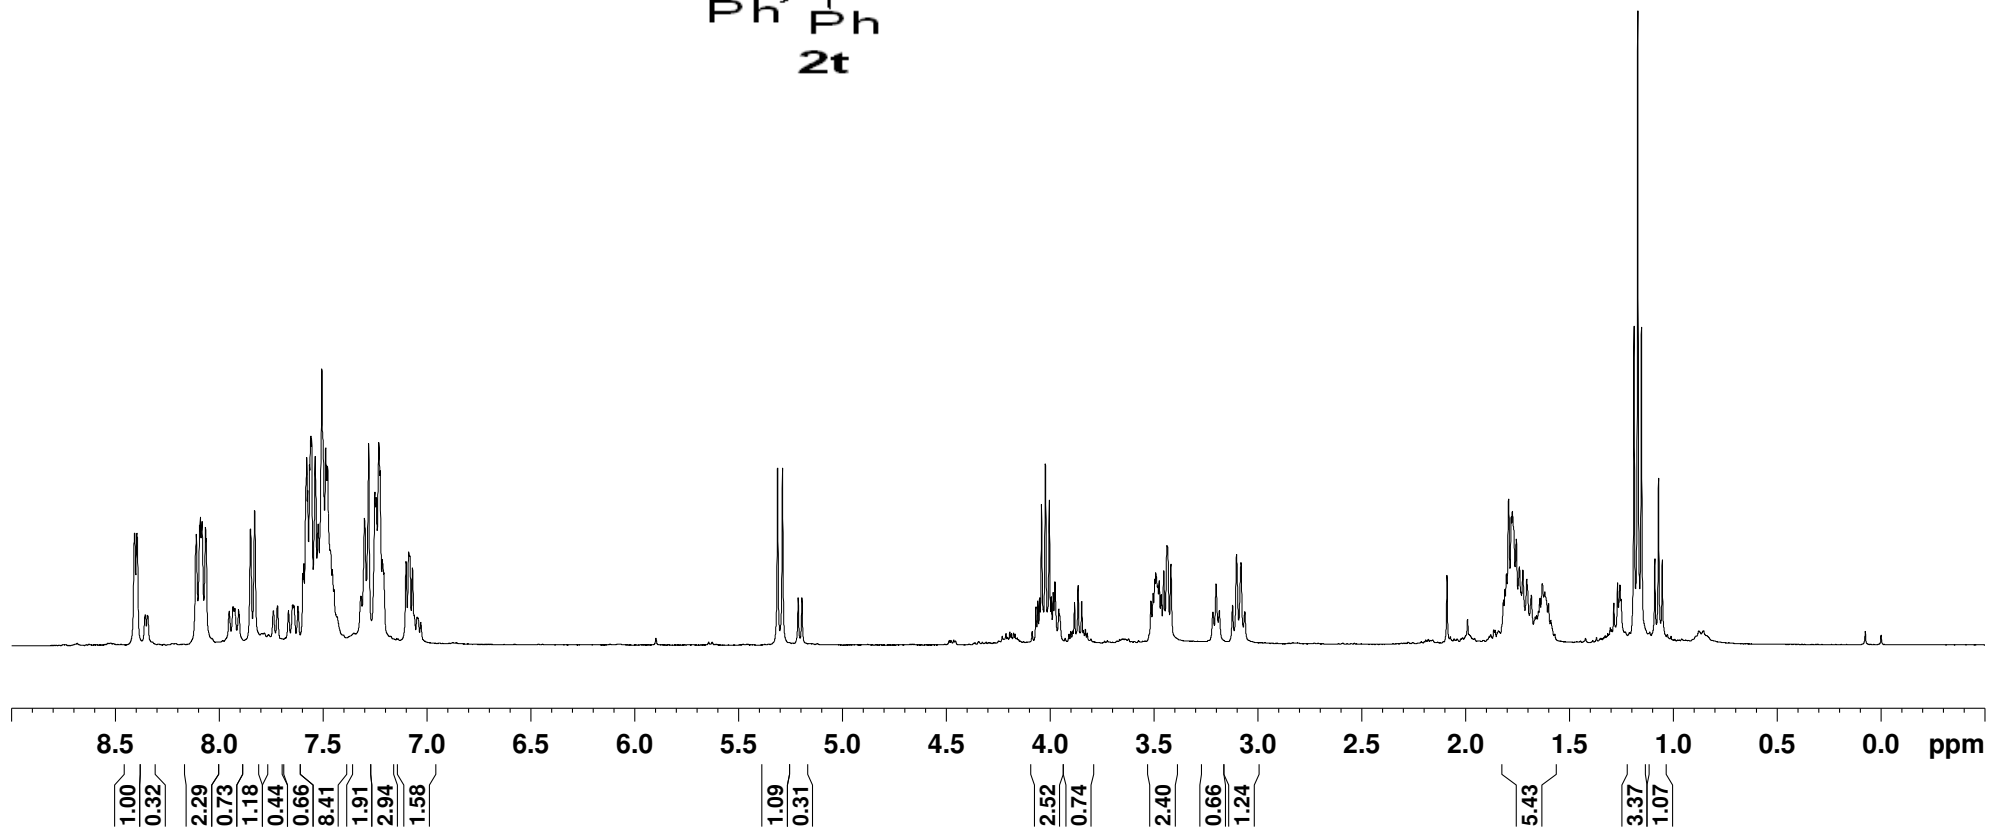

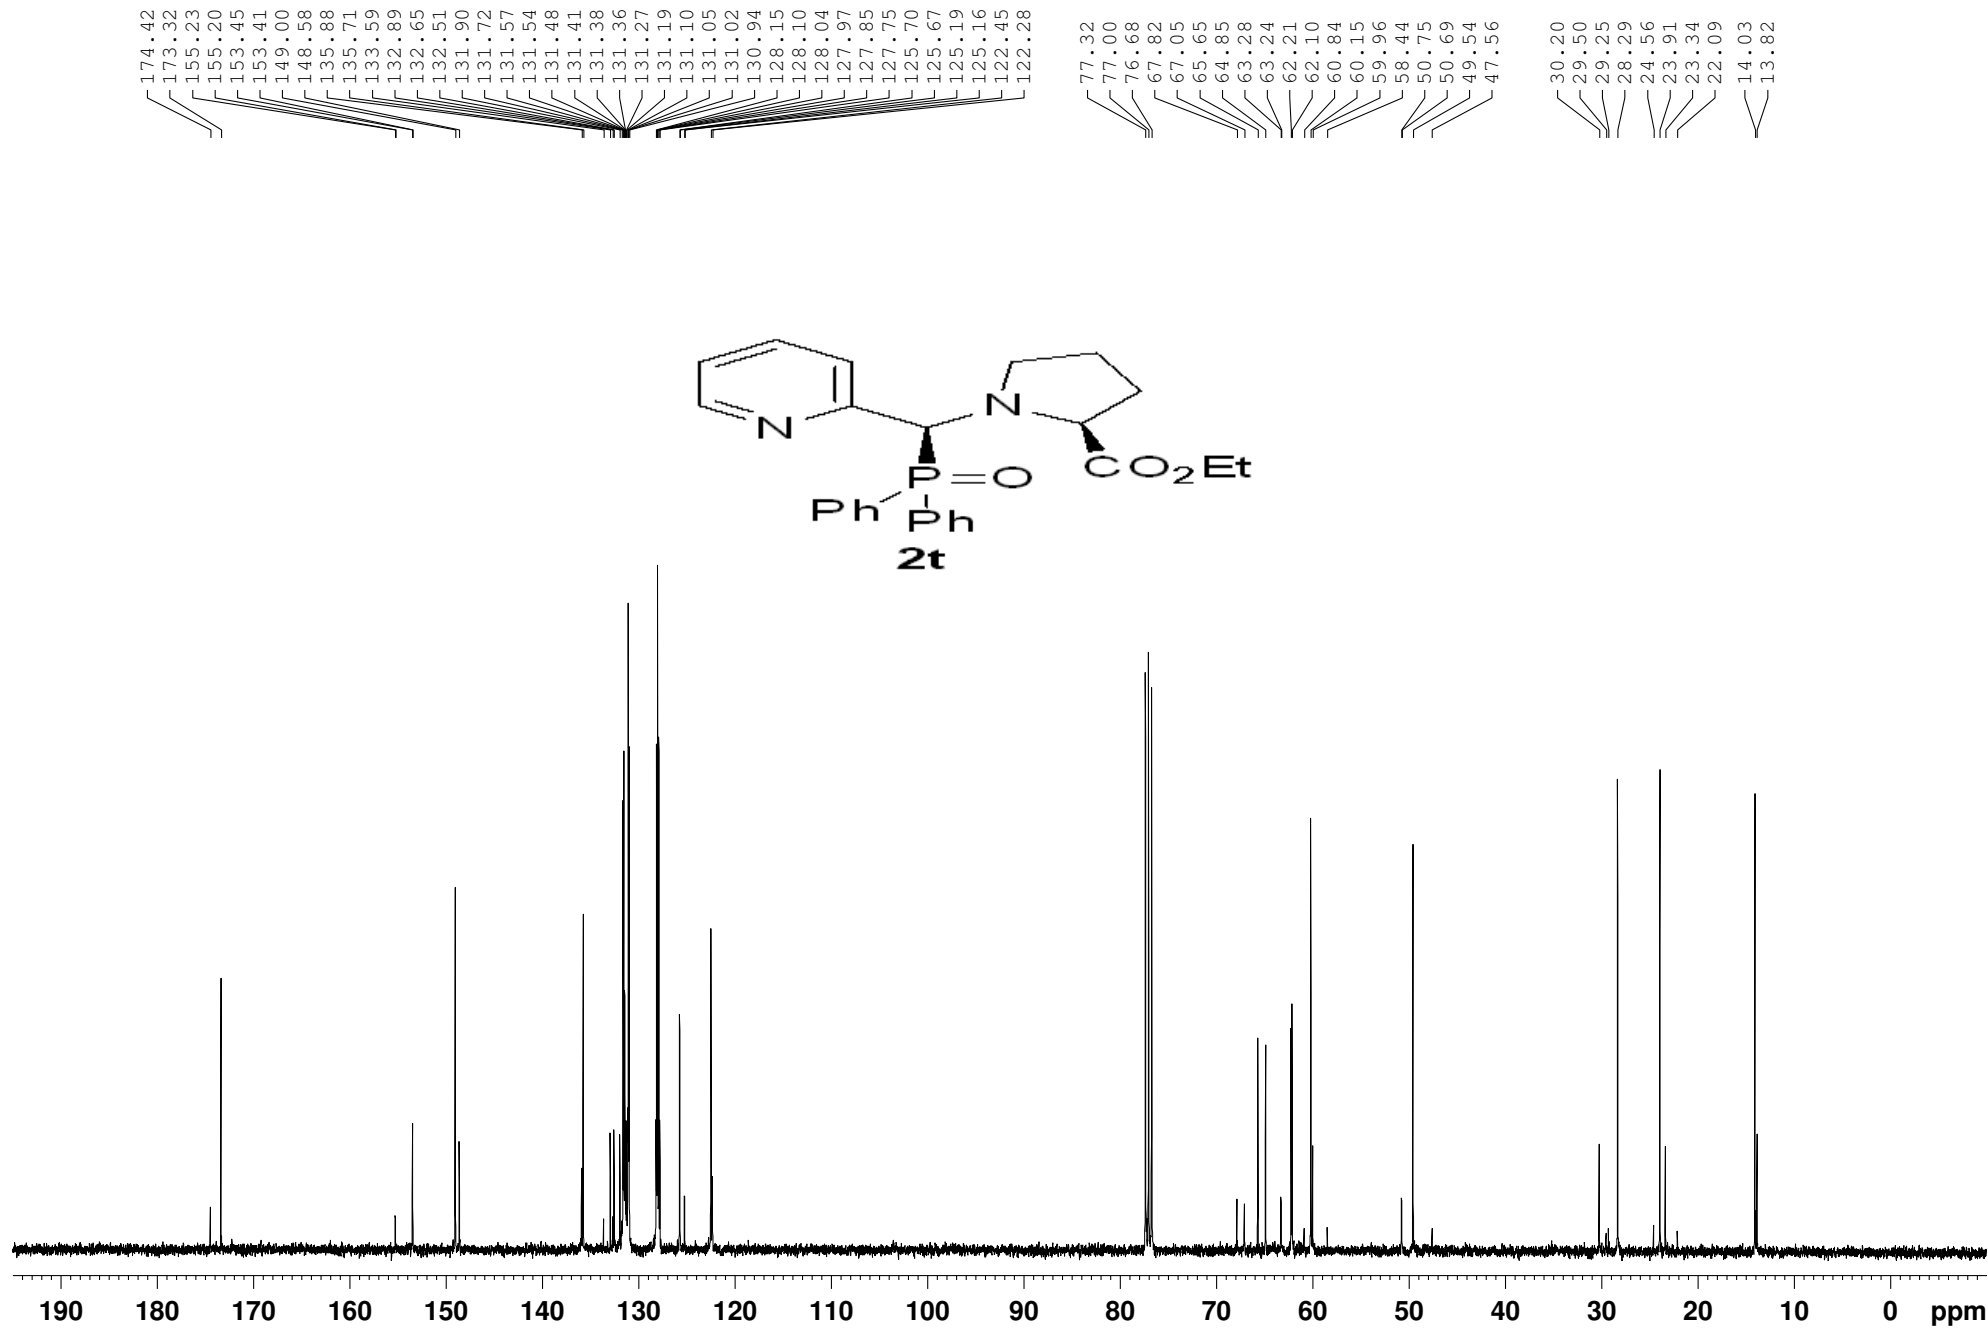

30.19  
29.56

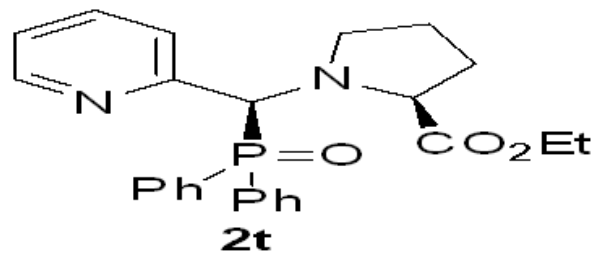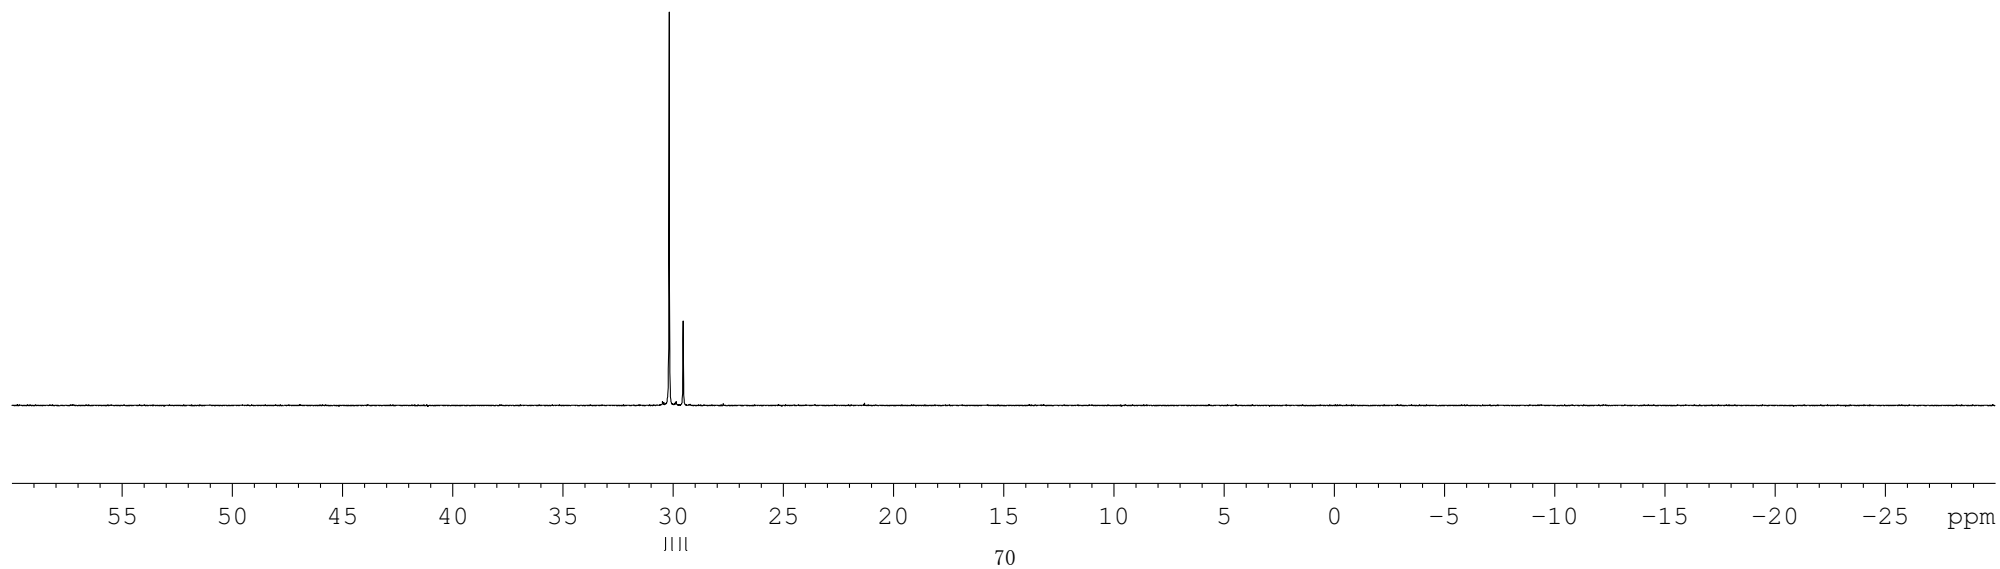

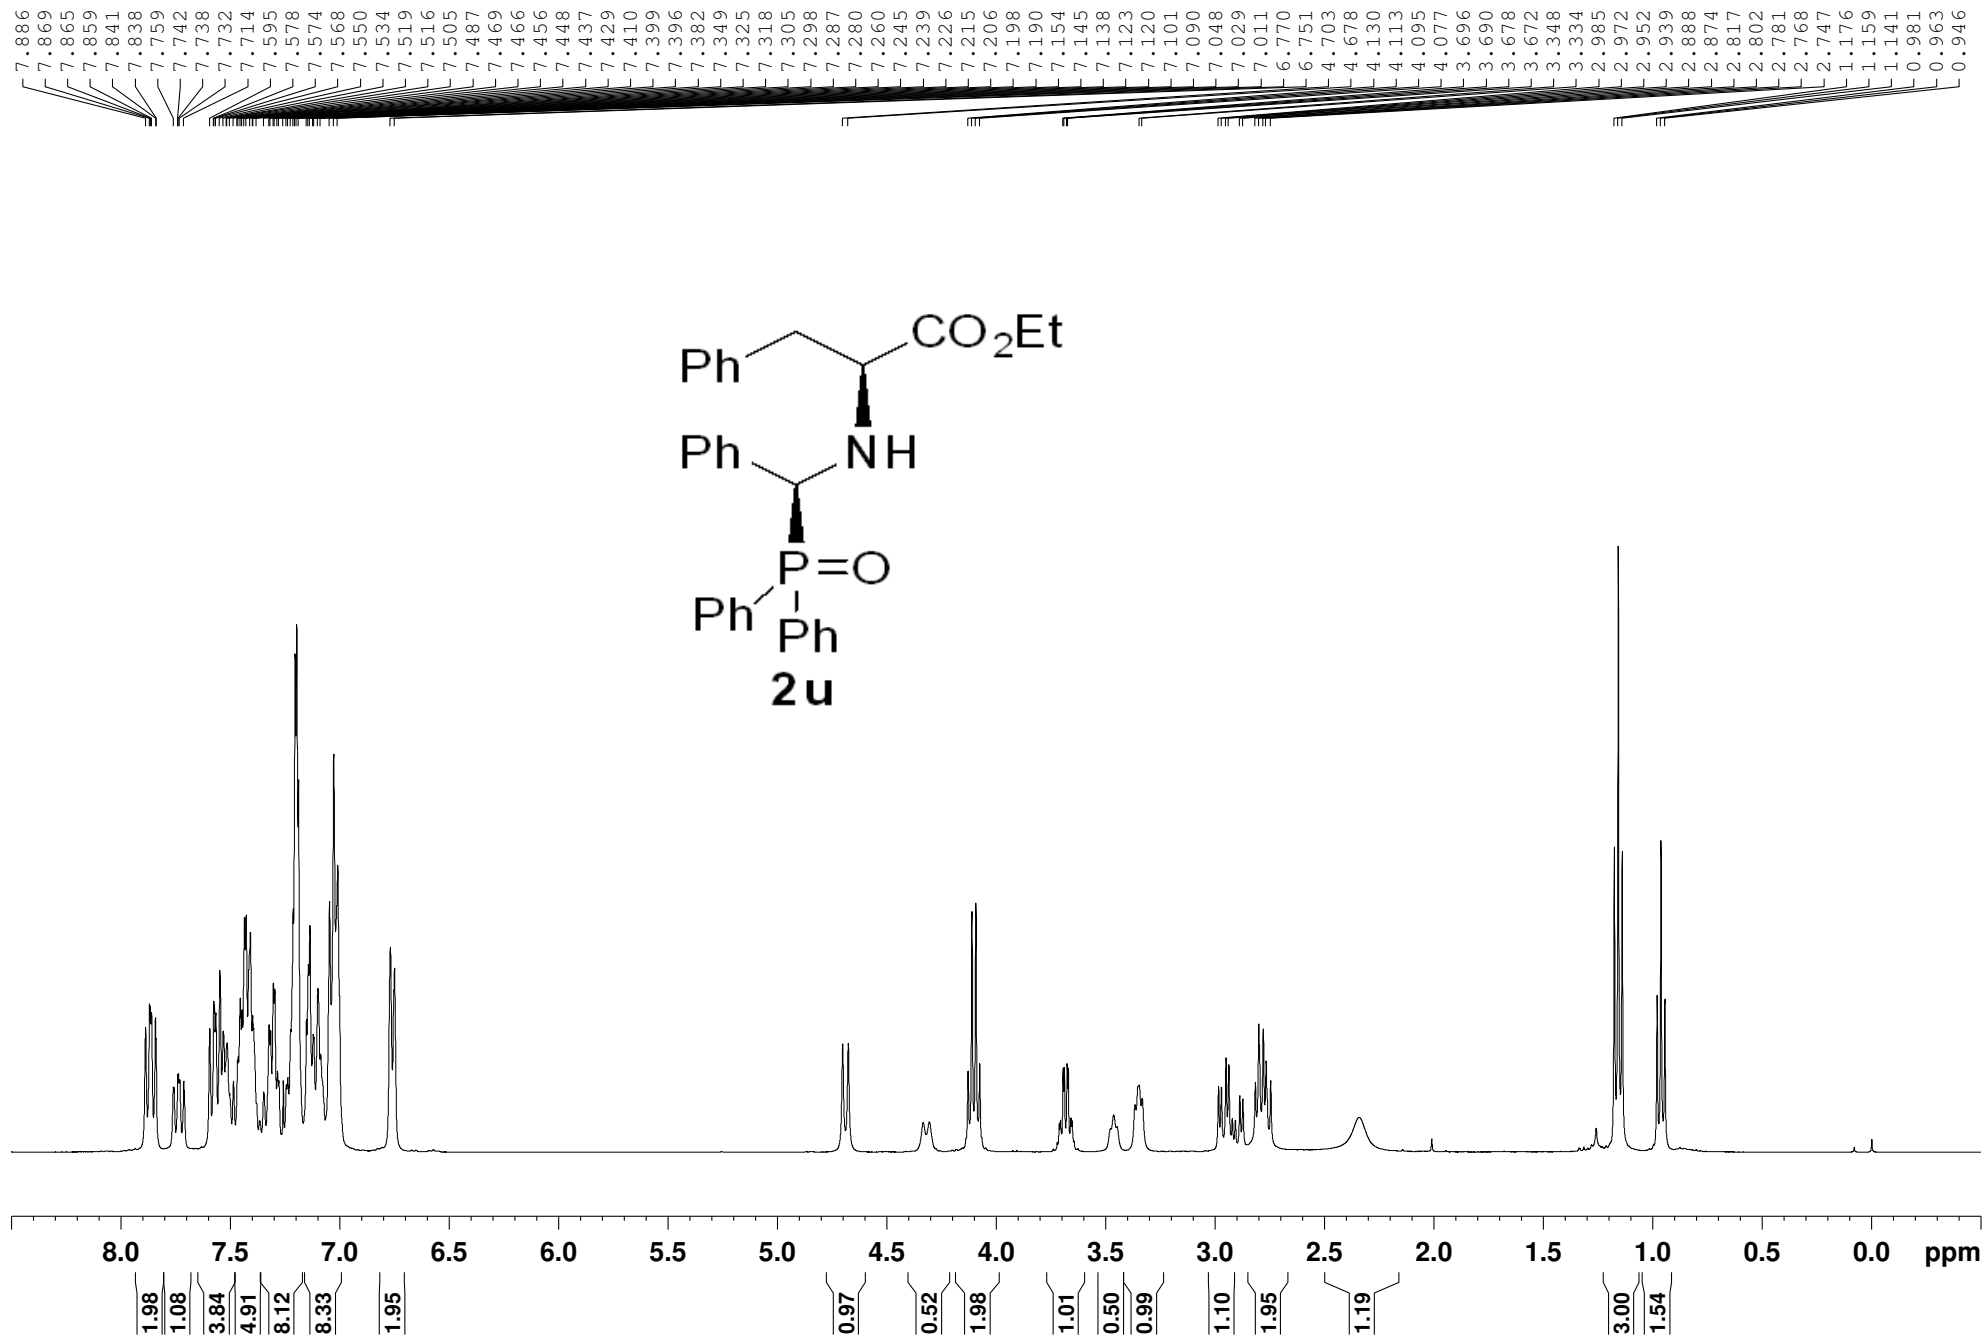

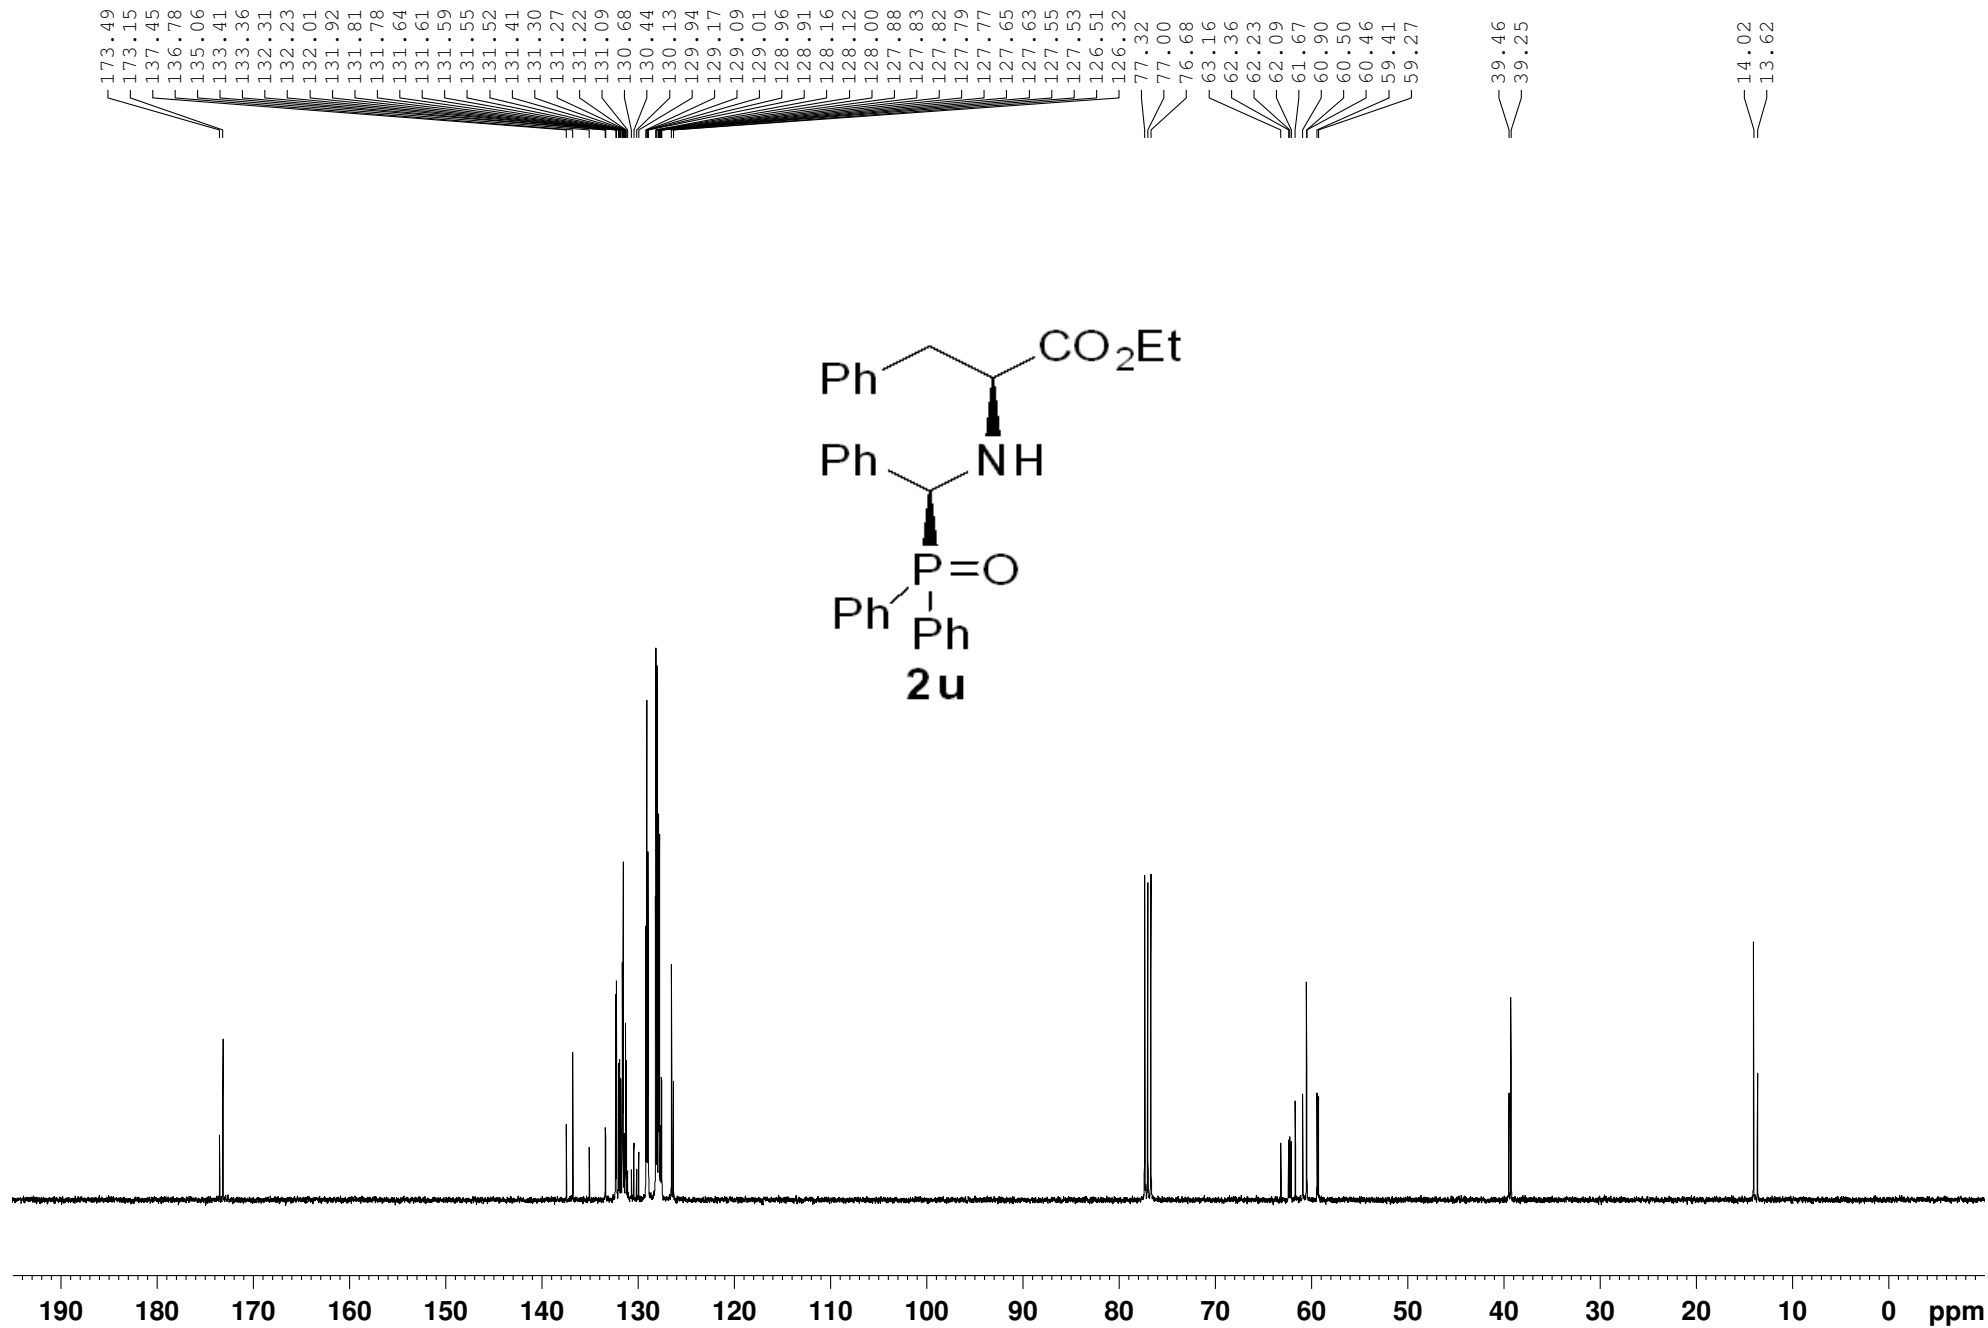



31.35  
30.05

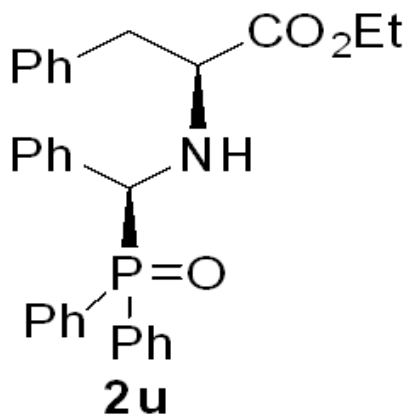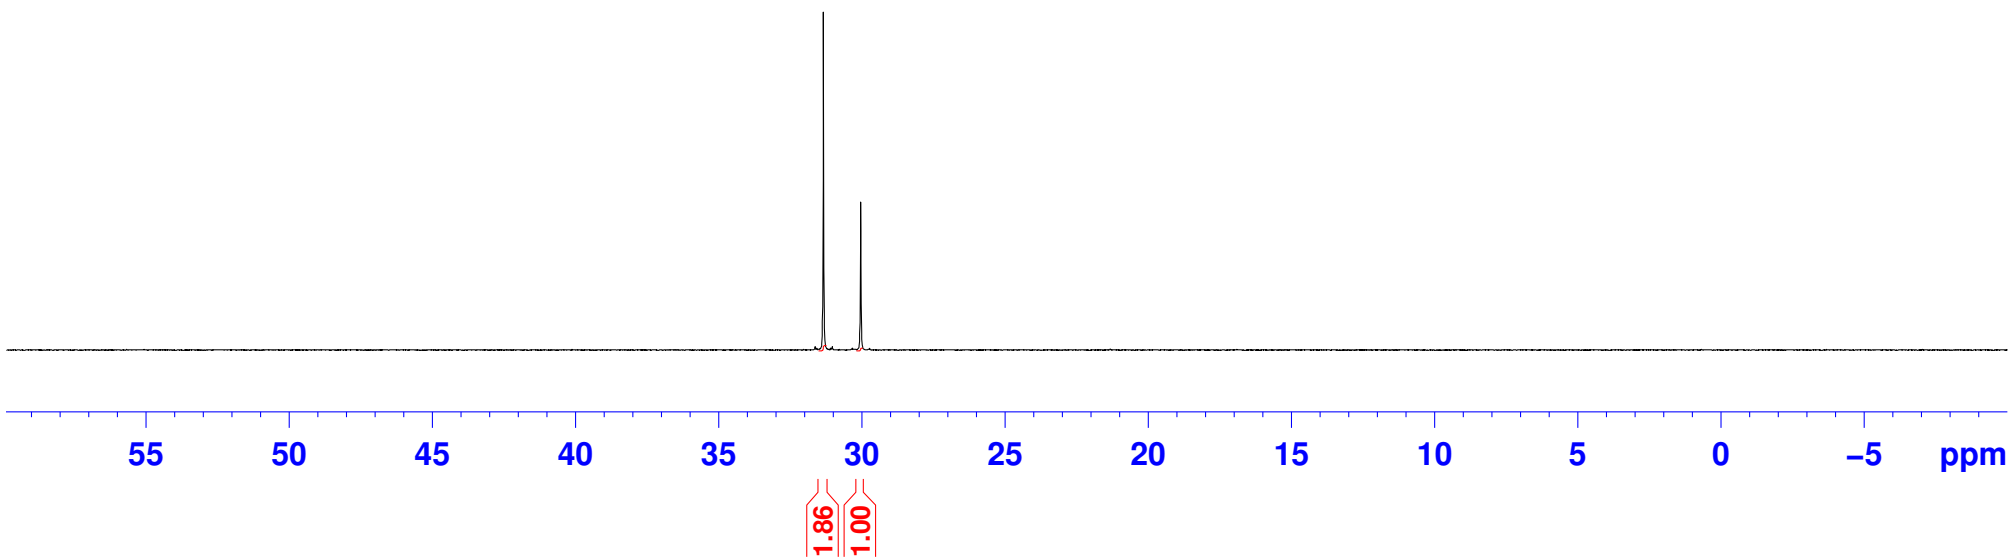

7.647  
7.556  
7.531  
7.512  
7.489  
7.428  
7.417  
7.391  
7.372  
7.353  
7.335  
7.317  
7.305  
7.294  
7.285  
7.276  
7.257  
7.237  
7.228  
7.221  
7.207  
7.188  
7.174  
7.145  
7.073  
7.067  
7.054  
7.048  
7.035

4.724  
4.699  
4.481  
4.465  
4.431  
4.418  
4.137  
4.113

2.756

1.994

1.394  
1.377  
1.355  
1.339  
1.214

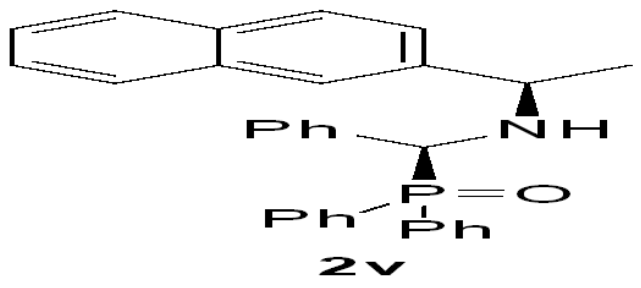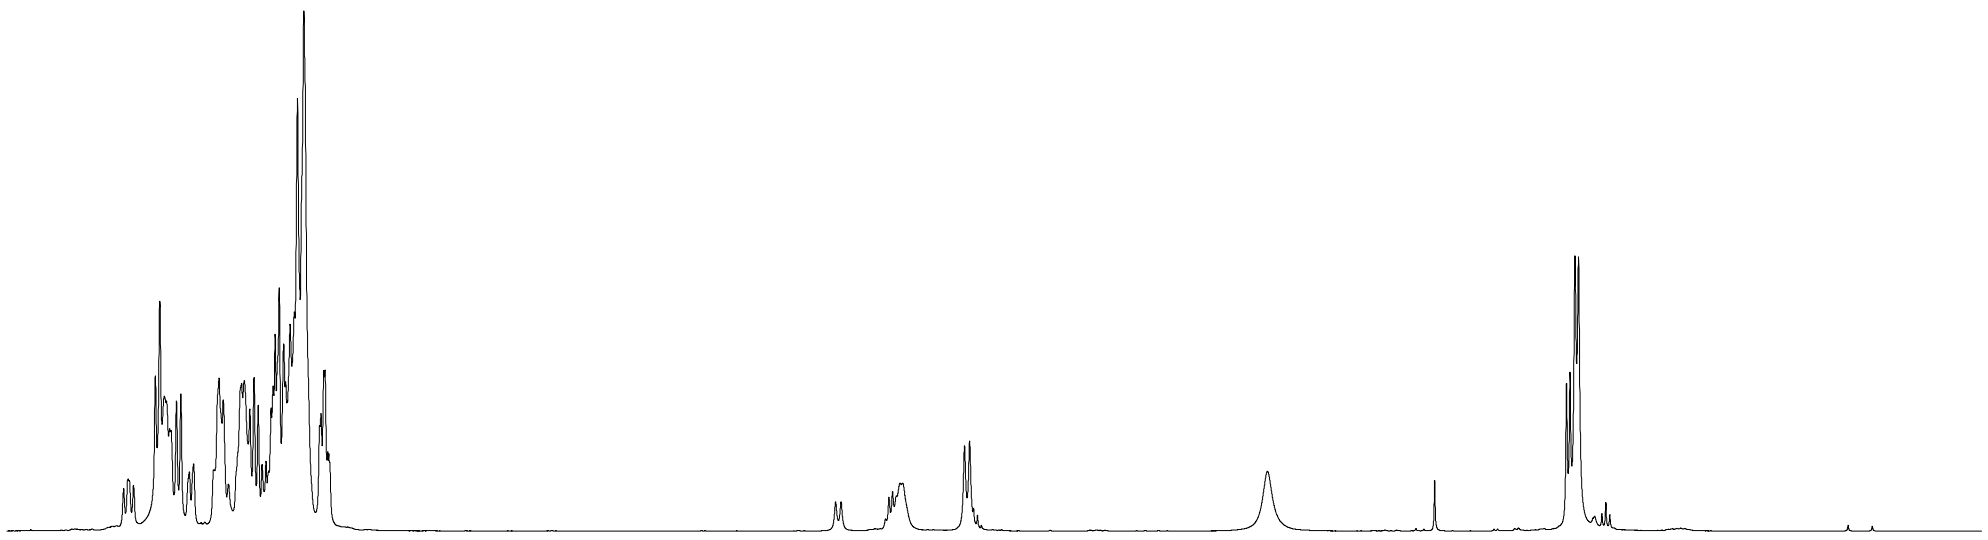

0.55  
4.01  
0.55  
1.99  
3.07  
10.14  
1.84

0.25  
0.99  
0.75

1.07

3.06

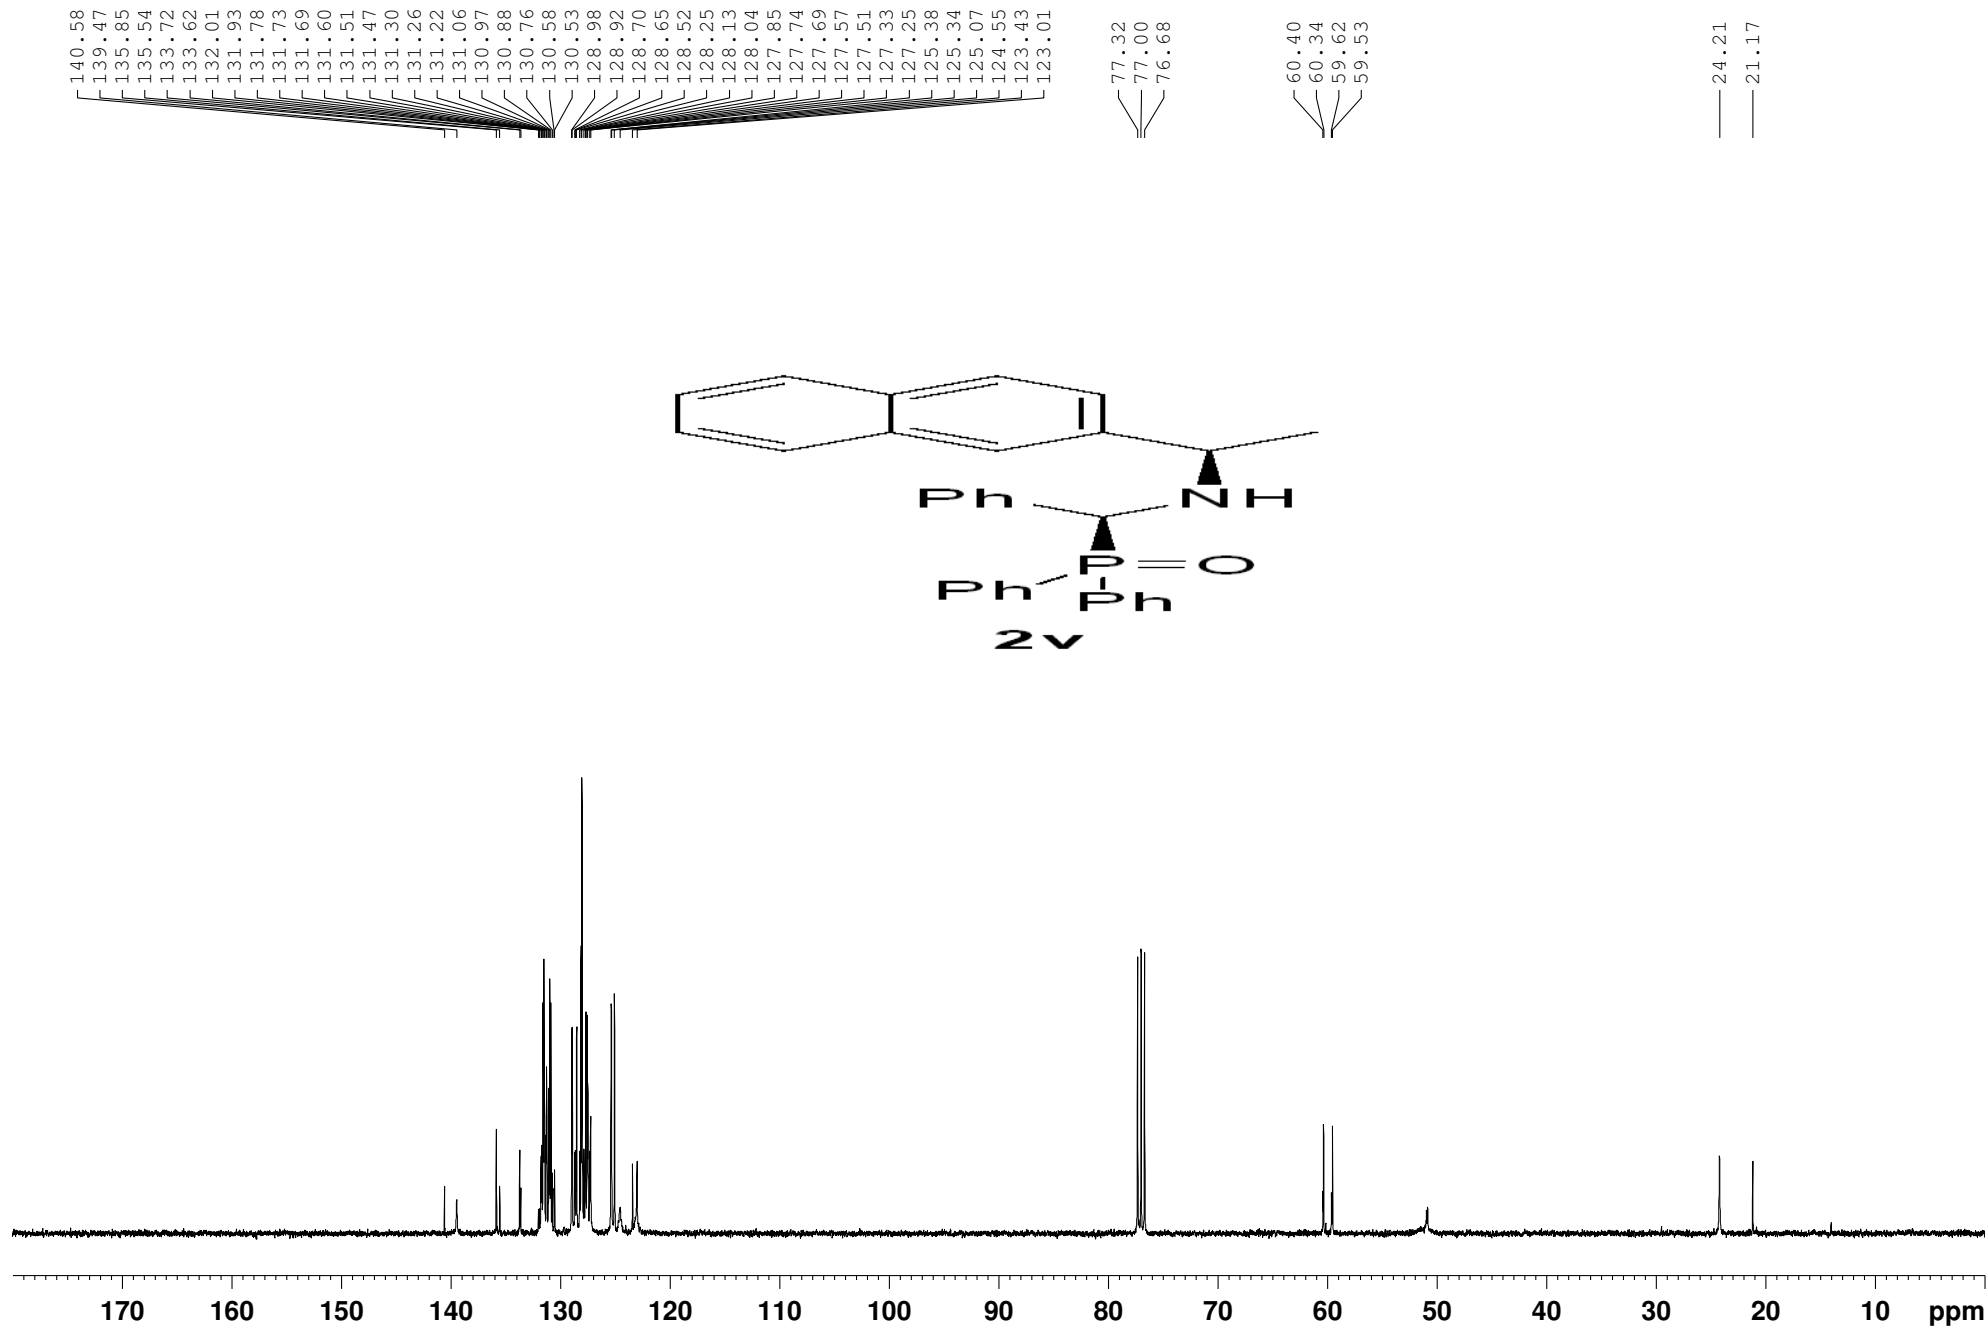

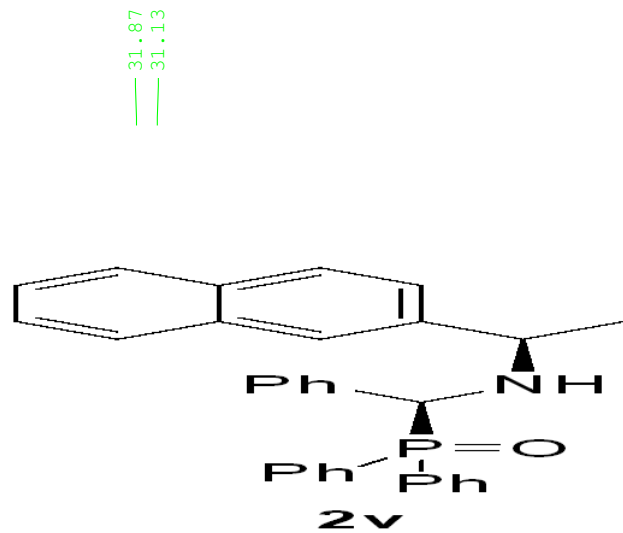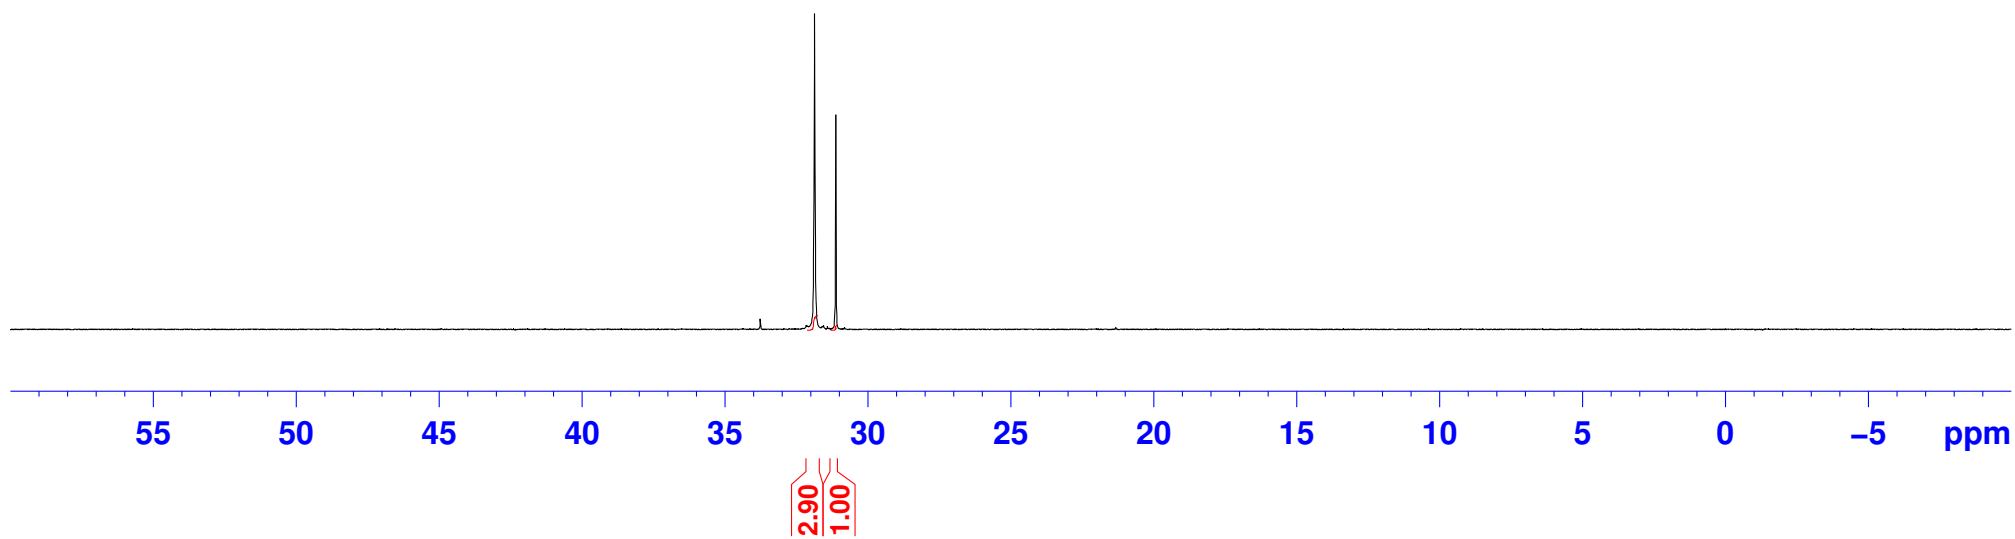

7.783  
7.610  
7.606  
7.603  
7.596  
7.591  
7.587  
7.581  
7.577  
7.572  
7.569  
7.566  
7.562  
7.559  
7.513  
7.506  
7.494  
7.487  
7.480  
7.476  
7.473  
7.462  
7.454  
7.244  
7.239  
7.225  
7.221  
7.213  
7.202  
7.189  
7.184  
5.632  
5.614

— 4.882

3.314  
3.310  
3.306

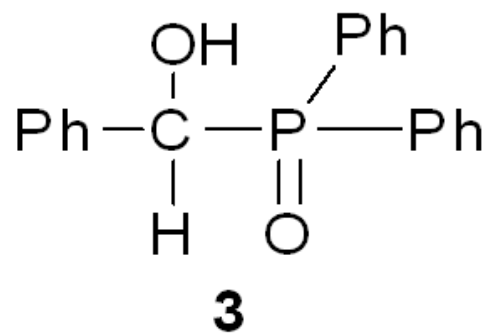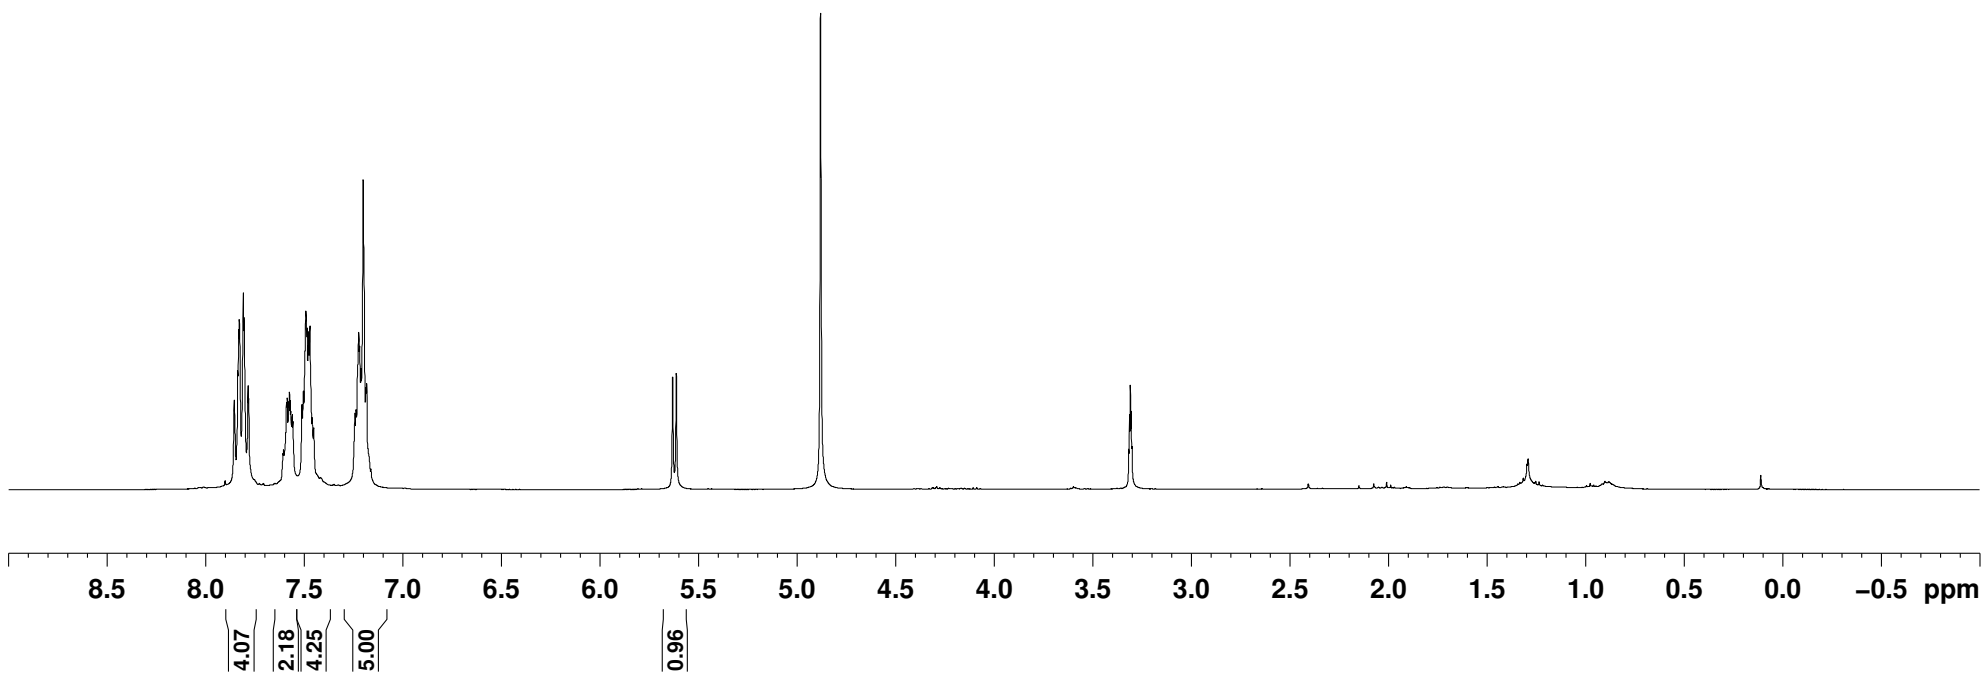

133.80  
133.71  
133.56  
133.48  
133.15  
133.01  
132.92  
132.19  
130.55  
129.82  
129.71  
129.59  
129.50  
129.39  
129.12  
128.98  
128.93

74.63  
73.76

49.79  
49.57  
49.36  
49.15  
48.94  
48.72  
48.51

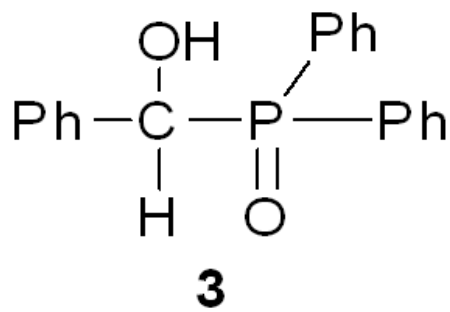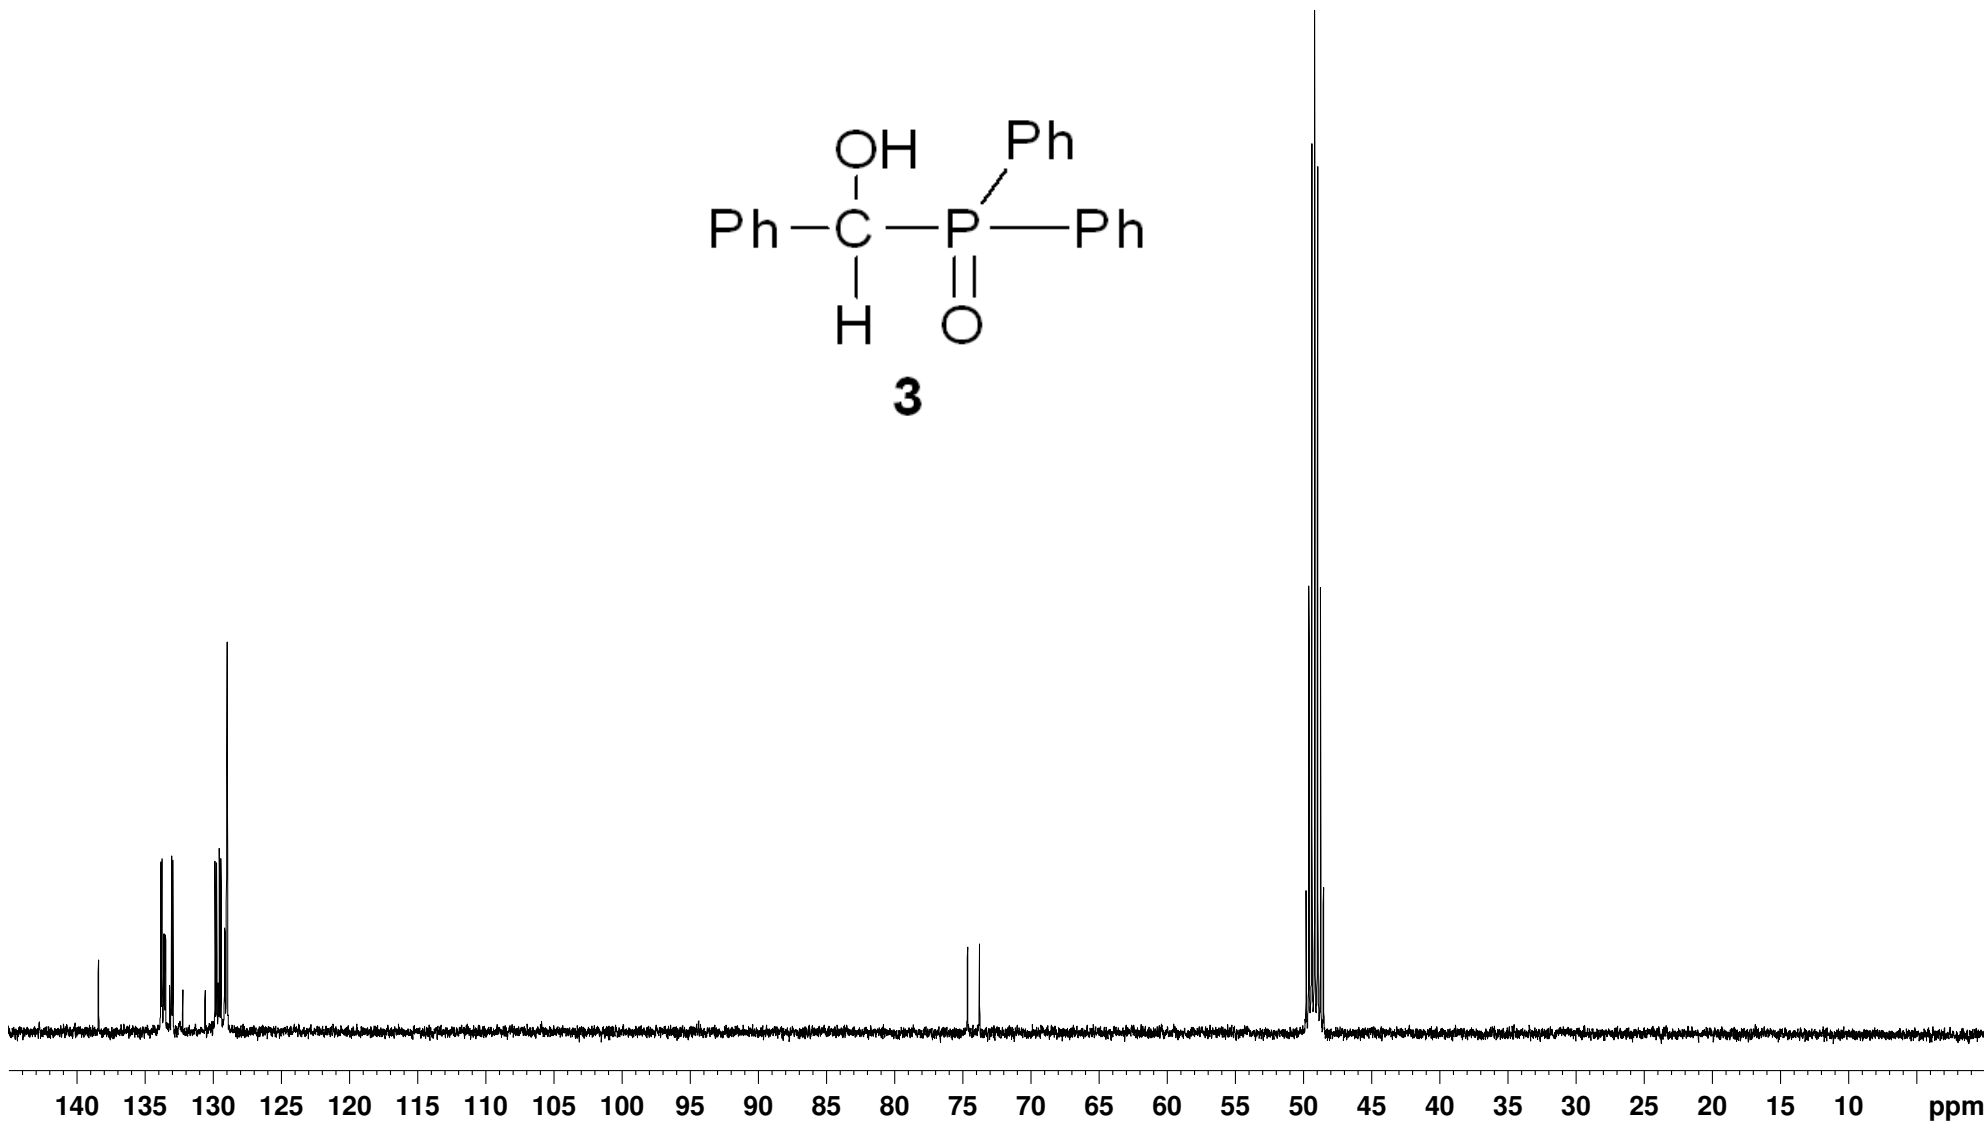

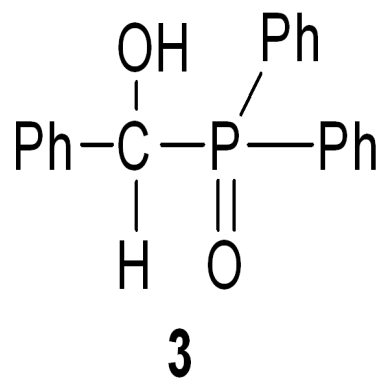

33.04

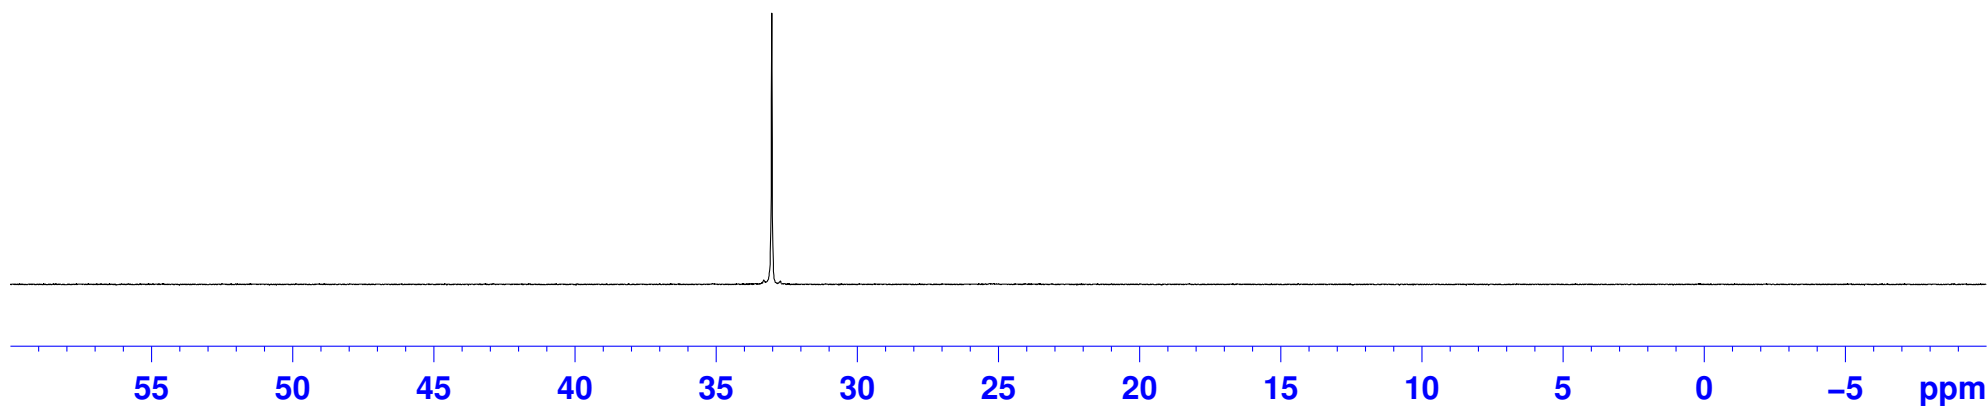

Supplement: c4ra05645k1.pdf [file c4ra05645k1.pdf]
